# Supplementary material
Source: publisher figshare collection journal article supplement (https://acs.figshare.com/ndownloader/files/4687375)

**Supporting Information**

**Structure-Activity Relationship Studies of Spinorphin as the Non-ionic Potent and Competitive Human P2X3 Receptor Antagonist**

Kwan-Young Jung,1 Hyoun Duk Moon,1 Ga Eun Lee, 1 Hyun-Ho Lim,1 Chul-Seung Park,1

Yong-Chul Kim1,2*

1Department of Life Science, Gwangju Institute of Science and Technology, Gwangju 500-712, Republic of Korea.

2Division of Drug Discovery, Angen, Inc. Gwangju 500-712, Republic of Korea.

**Table S1**. Puritya of spinorphin **5** and its derivatives

| **no.** | **sequence** | **purity** | **no.** | | **sequence** | **purity** |
| --- | --- | --- | --- | --- | --- | --- |
| **5** | LVVYPWT | 98.1 | | **14** | cyclic AVVYPWT | 98.1 |
| **6** | AVVYPWT | 98.2 | | **15** | (D)-TWPYVVL | 99.6 |
| **7** | LAVYPWT | 100 | | **16** | VYP | 98.8 |
| **8** | LVAYPWT | 99.0 | | **17** | VYPW | 99.5 |
| **9** | LVVAPWT | 99.8 | | **18** | VYPWT | 99.8 |
| **10** | LVVYAWT | 96.7 | | **19** | YPW | 99.8 |
| **11** | LVVYPAT | 98.1 | | **20** | YPWT | 99.5 |
| **12** | LVVYPWA | 99.6 | | **21** | PWT | 99.0 |
| **13** | cyclic LVVYPWT | 95.2 | | **22** | VVYPWT | 99.5 |

aPurity of spinorphin **5** and modified peptides was checked by HPLC system. Two solvent systems were used (A) was 0.1% TFA in H2O:0.1% TFA in CH3CN = 95:5 to 35:65 in 30 min with flow rate = 1 mL/min. (B) was 0.1% TFA in H2O:0.1% TFA in MeOH = 95:5 to 35:65 in 30 min with flow rate = 1 mL/min. Peaks were detected by UV absorption using a diode array detector.

**Peptide 5 (LVVYPWT)**


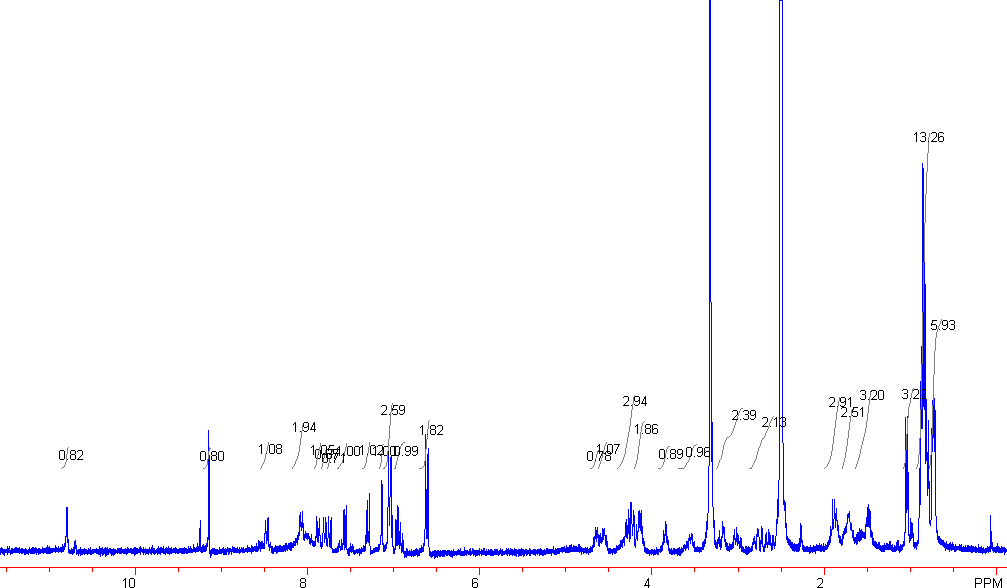

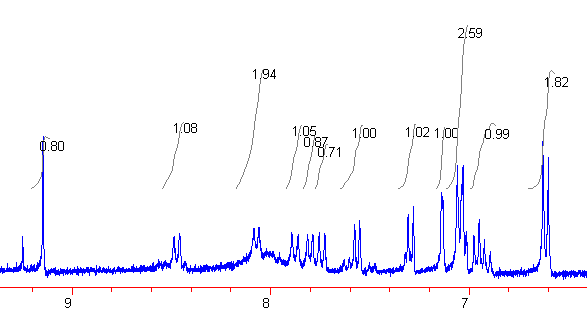

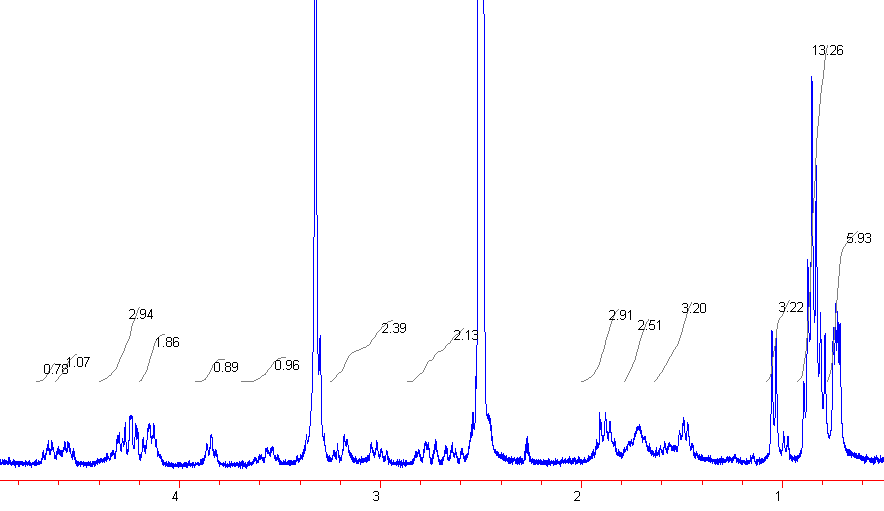


1H-NMR (DMSO-*d6*, 300 MHz) δ 10.74 (s, 1H, Trp); 9.15 (s, 1H, Tyr); 8.46 (d, *J* = 8.4 Hz, 1H, Tyr); 8.06 (d, *J* = 7.5 Hz, 1H, Trp); 7.95 (m, 2H, Leu); 7.86 (d, *J* = 9.6 Hz, 1H, Thr); 7.79 (d, *J* = 7.8 Hz, 1H, Val); 7.73 (d, *J* =8.4 Hz, 1H, Val); 7.55 (d, *J* =7.5 Hz, 1H, Trp); 7.28 (d, *J* = 7.8 Hz, 1H, Trp); 7.13 (s, 1H, Trp); 7.03 (d, *J* = 8.4 Hz, 2H, Tyr); 7.02-7.09 (m, 1H, Trp); 6.95 (dd, *J* = 8.4, 7.5 Hz, 1H, Trp); 6.60 (d, *J* = 8.4 Hz, 2H, Tyr); 4.64 (m, 1H, Tyr); 4.55-4.61 (m, 1H, Trp); 4.28-4.36 (m, 1H, Leu); 4.21-4.27 (m, 2H, 2H of each Val); 4.10-4.19 (m, 2H, each 1H of Thr); 3.84 (t, *J* = 6.9 Hz, 1H, Pro); 3.51-3.63 (m, 2H, Pro); 3.19-3.24 (m, 1H, Trp); 2.97-3.05 (m, 1H, Trp); 2.64-2.77 (tt, *J* = 10.2, 9.8 Hz, 2H, Tyr); 1.83-1.92 (m, 3H, 2H of each Val + 1H of Pro); 1.72 (m, 2H, Pro); 1.56 (m, 1H, Leu); 1.46 (dd, *J* = 6.3, 6.9 Hz, 2H, Leu); 1.03 (d, *J* = 6.3 Hz, 3H, Thr); 0.78-0.89 (m, 12H, 12H of each Val); 0.68-0.74 (d, *J* = 6.9 Hz, 6H, Leu). HRMS (FAB) Calcd. For C45H65N8O10 : 877.4824. Observed m/z 877.4829 HPLC (tR, min) system A: 21.6, system B: 25.6


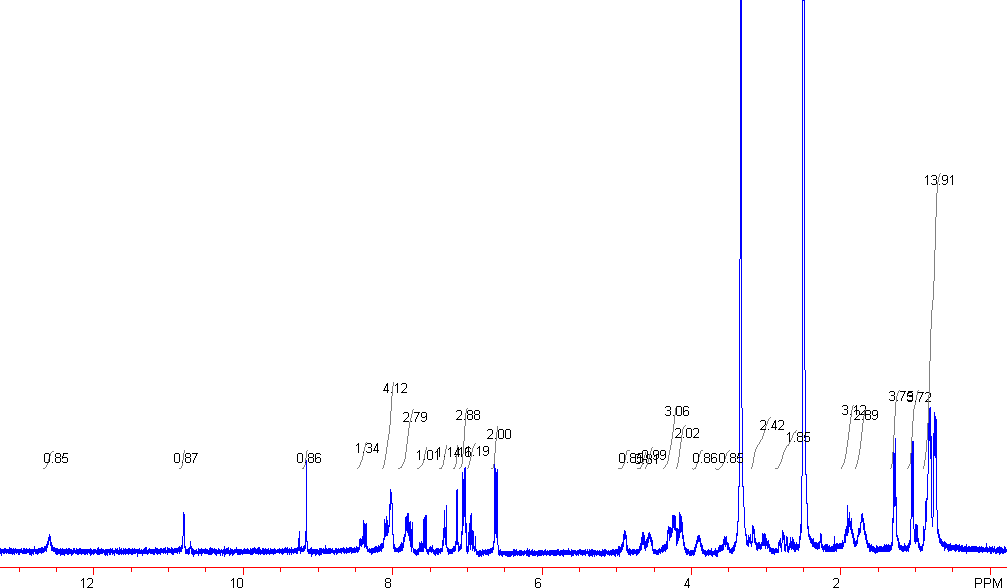

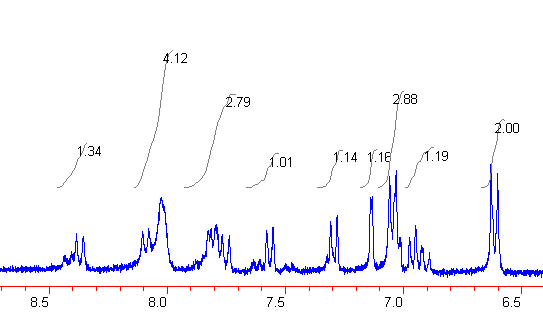

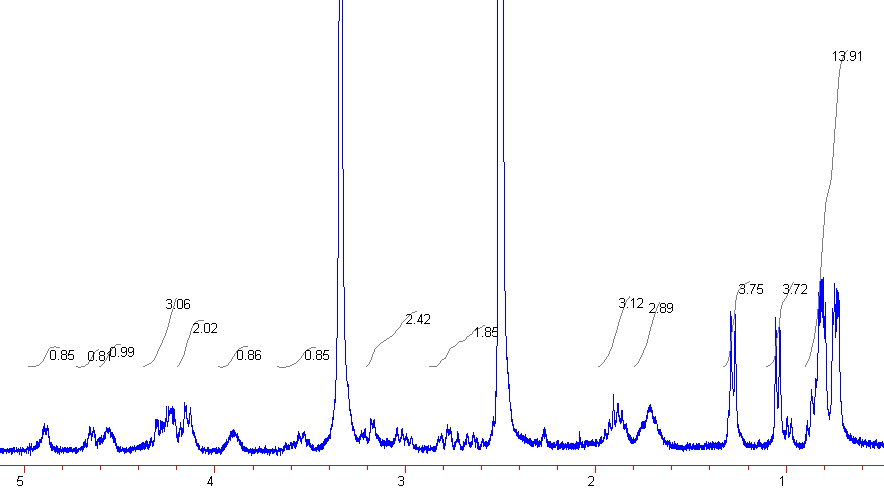


**Peptide 6 (AVVYPWT)**

1H-NMR (DMSO-*d6*, 300 MHz) δ 12.59 (s, 1H, Thr); 10.79 (s, 1H, Trp); 9.15 (s, 1H, Tyr); 8.36 (d, *J* = 8.4 Hz, 1H, Tyr); 8.08 (d, *J* = 7.2 Hz, 1H, Trp); 8.03 (m, 2H, Ala); 7.81 (d, *J* = 9.0 Hz, 1H, Thr); 7.79 (d, *J* = 9.0 Hz, 1H, Val); 7.76 (d, *J* = 9.0 Hz, 1H, Val); 7.55 (d, *J* = 8.1 Hz, 1H, Trp); 7.28 (d, *J* = 8.1 Hz, 1H, Trp); 7.13 (s, 1H, Trp); 7.04 (d, *J* = 8.7 Hz, 2H, Tyr); 7.02-7.04 (m, 1H, Trp); 6.95 (dd, *J* = 9.0, 8.1 Hz, 1H, Trp); 6.60 (d, *J* = 8.7 Hz, 2H, Tyr); 4.87 (d, *J* = 4.5 Hz, 1H, Thr); 4.64 (m, 1H, Tyr); 4.55 (m, 1H, Trp); 4.28-4.31(m, 1H, Ala); 4.24-4.27 (m, 1H, Val); 4.22-4.24 (m, 1H, Val); 4.11-4.18 (m, 1H, Thr); 4.11-4.15 (m, 1H, Thr); 3.90 (m, 1H, Pro); 3.53 (m, 1H, Pro); 3.16-3.27 (m, 1H, Trp); 2.95-3.05 (m, 1H, Trp); 2.64-2.77 (tt, *J* = 10.2, 9.8 Hz, 2H, Tyr); 1.83-1.96 (m, 3H, 2H of each Val + 1H of Pro); 1.67-1.75 (m, 2H, Pro); 1.03 (d, *J* = 6.9 Hz, 3H, Ala); 0.70-0.89 (m, 12H, 12H of each Val). HRMS (FAB) Calcd. For C42H59N8O10 : 835.4354. Observed m/z 835.4351 HPLC (tR, min) system A: 19.8 system B: 21.7


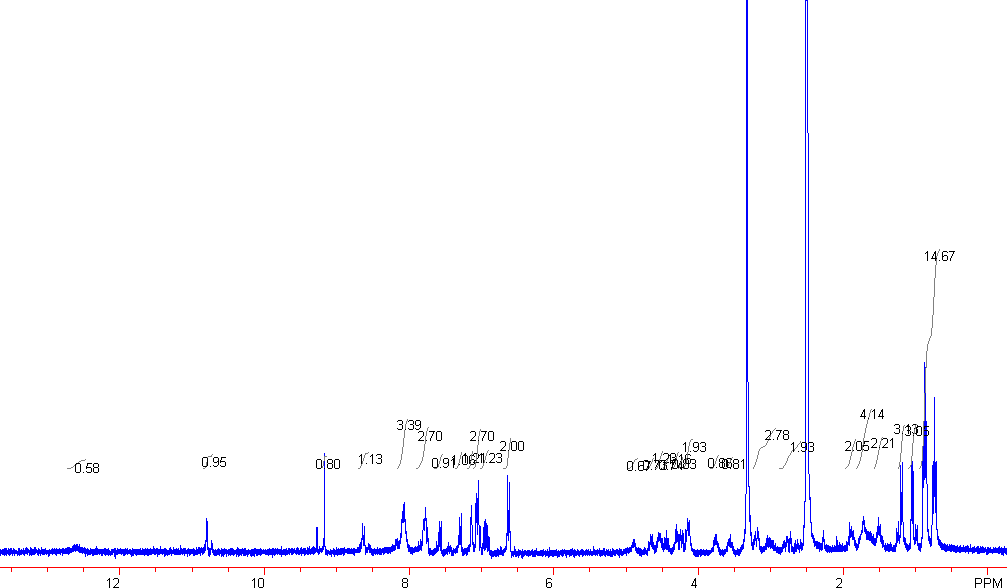

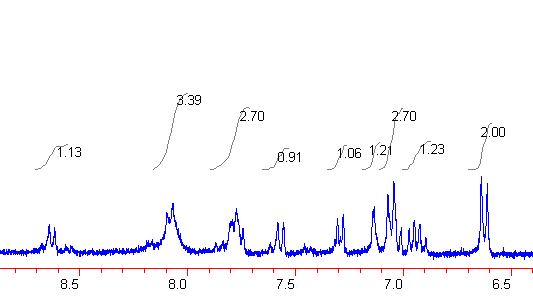

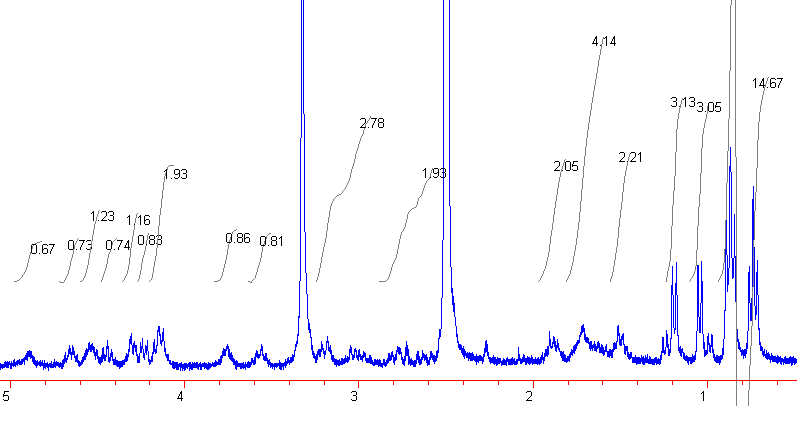


**Peptide 7 (LAVYPWT)**

1H-NMR (DMSO-*d6*, 300 MHz) δ 12.60 (bs, 1H, Thr); 10.78 (s, 1H, Trp); 9.16 (s, 1H, Tyr); 8.61 (d, *J* = 7.8 Hz, 1H, Tyr); 8.08 (d, *J* = 7.8 Hz, 1H, Trp); 8.04 (m, 2H, Leu); 7.80 (m, 1H, Thr); 7.75 (m, 1H, Val); 7.74 (m, 1H, Val); 7.56 (d, *J* = 7.2 Hz, 1H, Trp); 7.28 (d, *J* = 8.1 Hz, 1H, Trp); 7.13 (s, 1H, Trp); 7.05 (d, *J* = 8.4 Hz, 2H, Tyr); 7.01 (m, 1H, Trp); 6.92 (dd, *J* = 8.4, 7.2 Hz, 1H, Trp); 6.61 (d, *J* = 8.4 Hz, 2H, Tyr); 4.90 (m, 1H, Thr); 4.64 (m, 1H, Tyr); 4.53 (m, 1H, Trp); 4.45 (m, 1H, Val); 4.30 (m, 1H, Leu); 4.21 (m, 1H, Ala); 4.14-4.17 (m, 1H, Thr); 4.12-4.14 (m, 1H, Thr); 3.75 (m, 1H, Pro); 3.55 (m, 1H, Pro); 3.16-3.21 (m, 1H, Trp); 2.97-3.05 (m, 1H, Trp); 2.60-2.80 (m, 2H, Tyr); 1.87-1.91 (m, 2H, 1H of Val + 1H of Pro); 1.67-1.79 (m, 2H, Pro); 1.55-1.65 (m, 1H, Leu); 1.45-1.55 (m, 2H, Leu); 1.20 (d, *J* = 6.9 Hz, 3H, Ala); 1.01 (d, *J* = 6.0 Hz, 3H, Tyr); 0.85 (dd, *J* = 7.2, 6.6 Hz, 6H, Val); 0.71 (t, *J* = 6.9 Hz, 6H, Leu). HRMS (FAB) Calcd. For C43H61N8O10 : 849.4511. Observed m/z 849.4511 HPLC (tR, min) system A:21.1 system B: 24.0


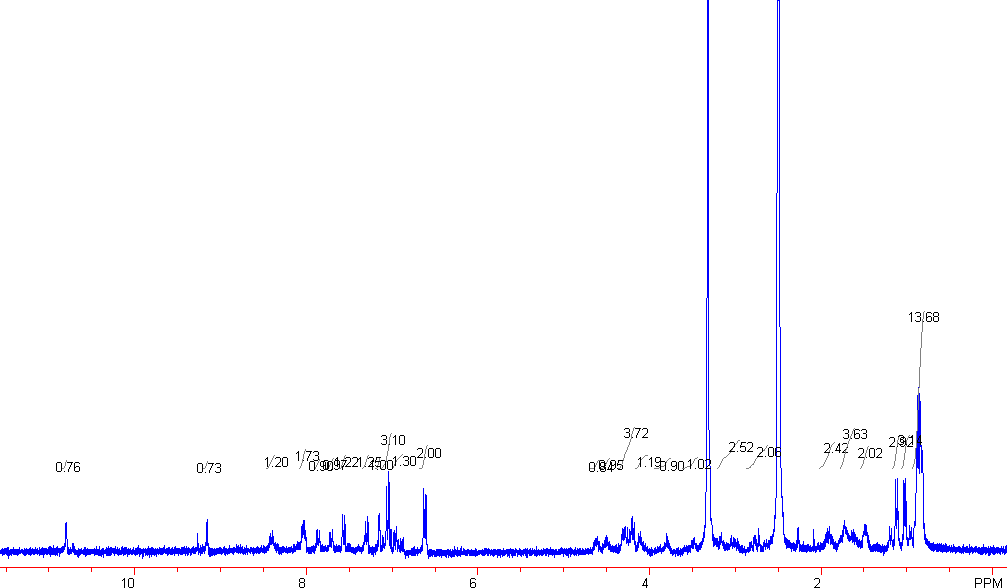

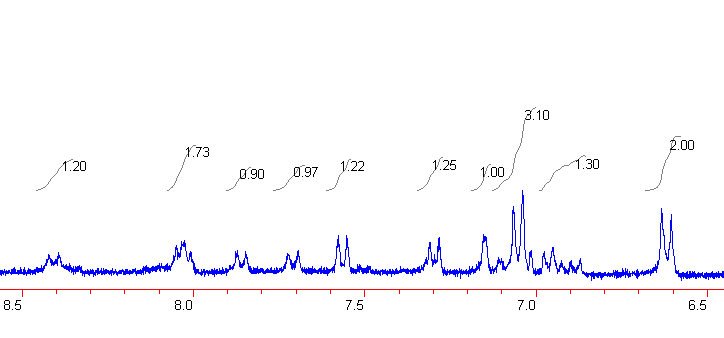

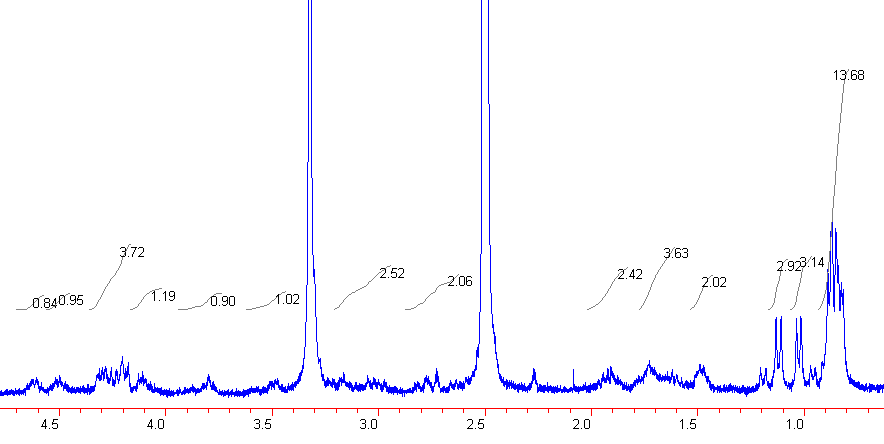


**Peptide 8 (LVAYPWT)**

1H-NMR (DMSO-*d6*, 300 MHz) δ 10.80 (s, 1H, Trp); 9.15 (s, 1H, Tyr); 8.40 (d, *J* = 8.4 Hz, 1H, Tyr); 8.05 (d, *J* = 7.5 Hz, 1H, Trp); 8.00 (m, 2H, Leu); 7.85 (d, *J* = 7.2 Hz, 1H, Thr); 7.70 (d, *J* = 9.2 Hz, 1H, Val); 7.55 (d, *J* = 7.5 Hz, 1H, Trp); 7.28 (d, *J* = 7.5 Hz, 1H, Trp); 7.15 (s, 1H, Trp); 7.05 (d, *J* = 8.7 Hz, 2H, Tyr); 7.00-7.05 (m, 1H, Trp); 6.95 (dd, *J* = 8.7, 7.5 Hz, 1H, Trp); 6.60 (d, *J* = 8.7Hz, 2H, Tyr); 4.60-4.67 (m, 1H, Thr); 4.45-4.55 (m, 1H, Trp); 4.25-4.35 (m, 2H, 1H of Leu + 1H of Val); 4.17-4.25 (m, 2H, 1H of Ala + 1H of Thr); 4.07-4.15 (m, 1H, Thr); 3.65-3.85 (m, 1H, Pro); 3.45-3.55 (m, 1H, Pro); 3.13-3.25 (m, 1H, Trp); 2.98-3.05 (m, 1H, Trp); 2.60-2.85 (m, 2H, Tyr); 1.85-1.98 (m, 2H, 1H of Val + 1H of Pro); 1.70-1.80 (m, 2H, Pro); 1.55-1.65 (m, 1H, Leu); 1.45-1.52 (m, 2H, Leu); 1.10 (d, *J* = 6.9 Hz, 3H, Ala); 1.01 (d, *J* = 6.0 Hz, 3H, Thr); 0.81-0.95 (m, 12H, 6H of Val + 6H of Leu). HRMS (FAB) Calcd. For C43H61N8O10 : 849.4511. Observed m/z 849.4514 HPLC (tR, min) system A: 20.0 system B: 22.5

**Peptide 9 (LVVAPWT)**


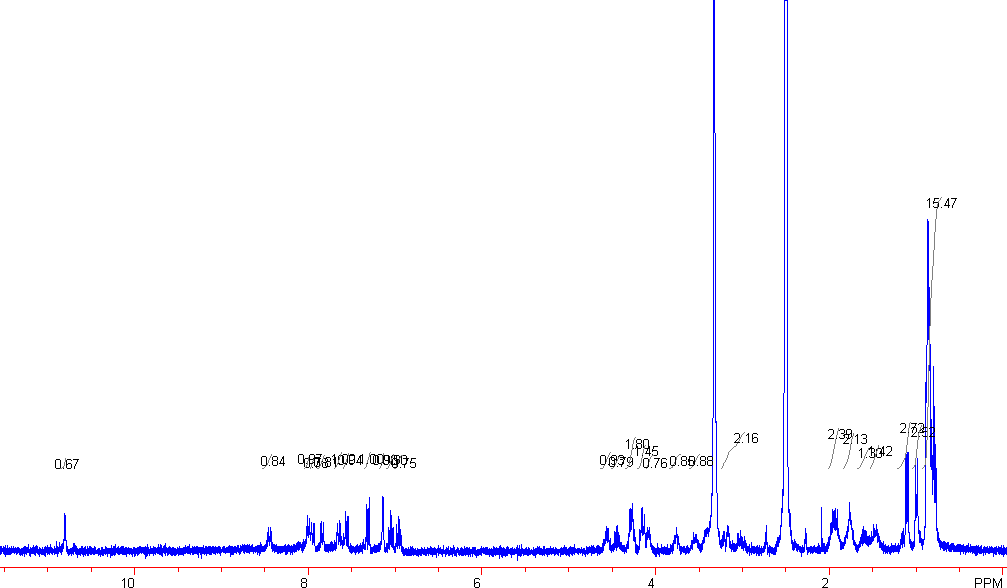

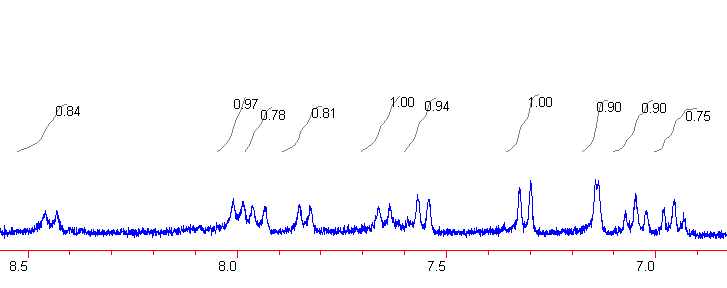

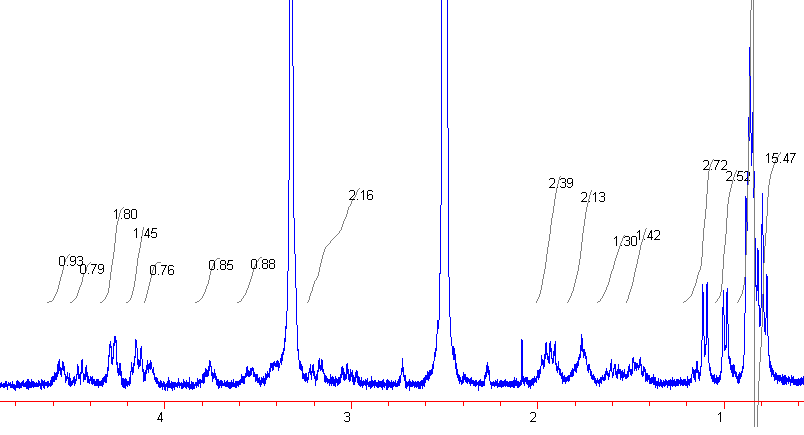


1H-NMR (DMSO-*d6*, 300 MHz) δ 10.80 (s, 1H, Trp); 8.43 (d, *J* = 8.1 Hz, 1H, Ala); 8.00 (d, *J* = 7.2 Hz, 1H, Trp); 7.93 (d, *J* = 9.0 Hz, 1H, Thr); 7.82 (d, *J* = 7.5 Hz, 1H, Val); 7.66 (d, *J* = 8.1 Hz, 1H, Val); 7.55 (d, *J* = 7.8 Hz, 1H, Trp); 7.30 (d, *J* = 7.8 Hz, 1H, Trp); 7.13 (s, 1H, Trp); 7.02 (dd, *J* = 6.9, 7.8 Hz, 1H, Trp); 6.93 (dd, *J* = 6.9, 7.8 Hz, 1H, Trp); 4.50-4.55 (m, 1H, Ala); 4.40-4.48 (m, 1H, Trp); 4.26-4.30 (m, 2H, 2H of each Val); 4.12-4.15 (m, 2H, 1H of Leu + 1H of Thr); 4.05-4.10 (m, 1H, Thr); 3.72-3.80 (m, 1H, Pro); 3.16-3.23 (m, 1H, Trp); 2.97-3.05 (m, 1H, Trp); 1.85-2.00 (m, 3H, 1H of Pro + 2H of each Val); 1.70-1.80 (m, 2H, Pro); 1.55-1.65 (m, 1H, Leu); 1.40-1.50 (m, 2H, Leu); 1.10 (d, *J* = 7.2 Hz, 3H, Ala); 1.00 (d, *J* = 6.0 Hz, 3H, Thr); 0.75-0.88 (m, 18H, 6H of Leu + 12H of each Val). HRMS (FAB) Calcd. For C39H61N8O9 : 785.4562. Observed m/z 785.4579 HPLC (tR, min) system A: 32.4 system B: 23.9

**Peptide 10 (LVVYAWT)**


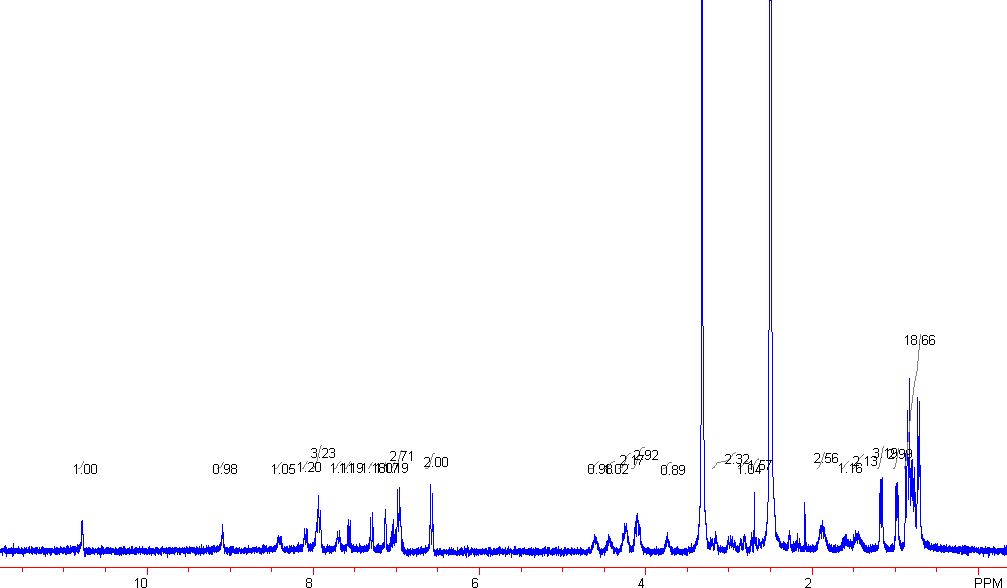

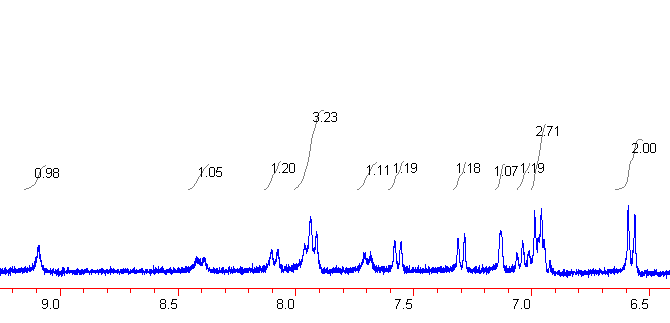

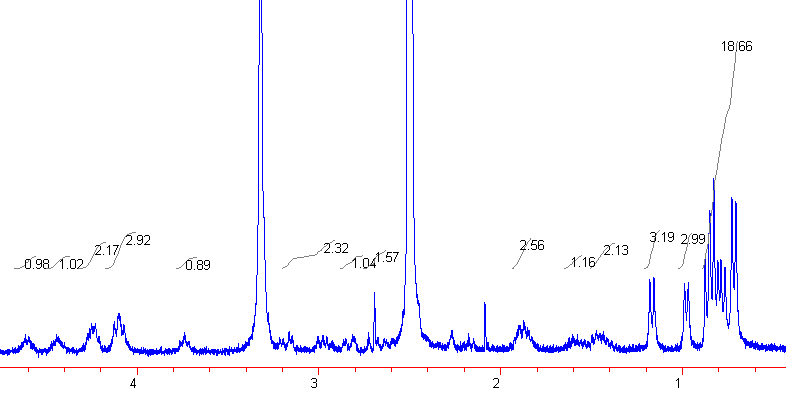


1H-NMR (DMSO-*d6*, 300 MHz) δ 10.77 (s, 1H, Trp); 9.08 (s, 1H, Tyr); 8.40 (m, 1H, Ala); 8.07 (d, *J* = 7.8 Hz, 1H, Tyr); 7.91-7.96 (app.m, 3H, 2H of each Val + 1H of Trp); 7.68 (d, *J* = 6.9 Hz, 1H, Thr); 7.55 (d, *J* = 7.8 Hz, 1H, Trp); 7.28 (d, *J* = 8.1 Hz, 1H, Trp); 7.13 (s, 1H, Trp); 7.03 (dd, *J* = 6.9, 6.6 Hz, 1H, Trp); 6.98 (d, *J* = 8.4 Hz, 2H, Tyr); 6.90-7.00 (m, 1H, Tyr); 6.58 (d, *J* = 8.4 Hz, 2H, Tyr); 4.55-4.65 (m, 1H, Tyr); 4.39-4.50 (m, 1H, Trp); 4.20-4.30 (m, 2H, 2H of each Val); 4.05-4.15 (m, 3H, 1H of Leu + 2H of Thr); 3.70-3.80 (m, 1H, Ala); 3.16-3.20 (m, 1H, Trp); 2.92-3.02 (m, 1H, Trp); 2.60-2.85 (m, 2H, Tyr); 1.80-1.95 (m, 2H, 2H of each Val); 1.50-1.65 (m, 1H, Leu); 1.37-1.50 (m, 2H, Leu); 1.15 (d, *J* = 6.9 Hz, 3H, Ala); 0.97 (d, *J* = 6.3 Hz, 3H, Thr); 0.67-0.87 (m, 18H, 12H of each Val + 6H of Leu). HRMS (FAB) Calcd. For C43H63N8O10 : 851.4667. Observed m/z 851.4653 HPLC (tR, min) system A: 21.2 system B: 23.7

**Peptide 11 (LVVYPAT)**


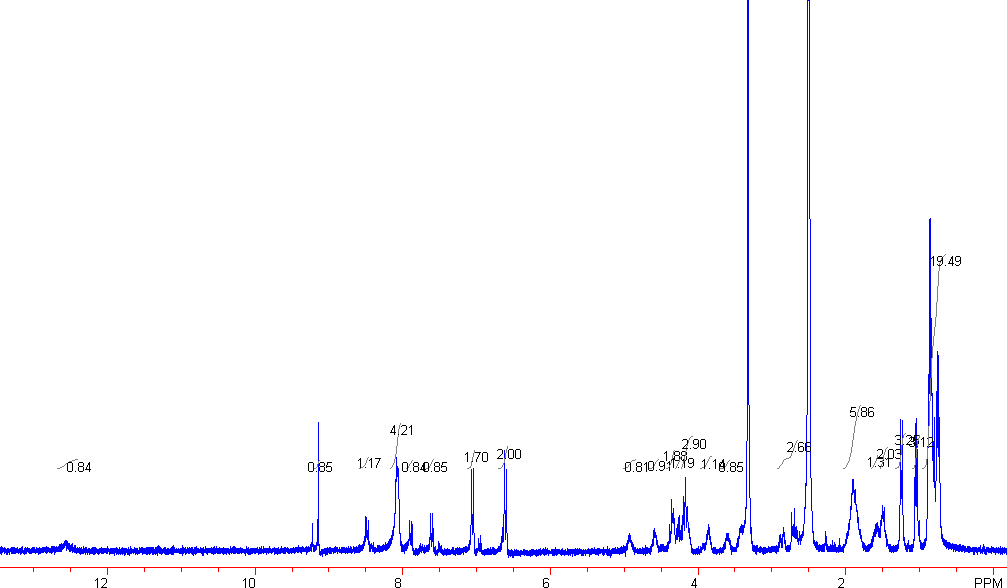

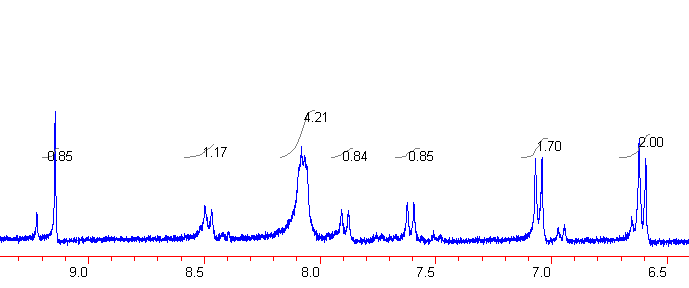

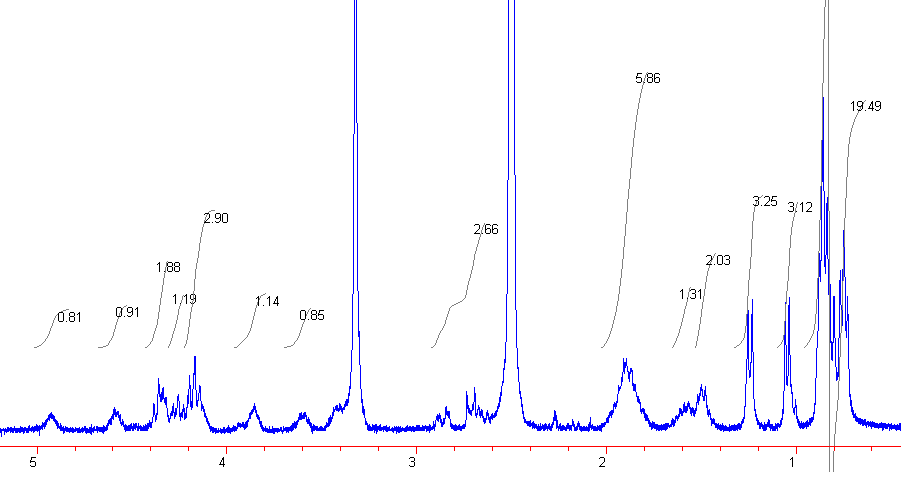


1H-NMR (DMSO-*d6*, 300 MHz) δ 12.58 (s, 1H, Thr); 9.14 (s, 1H, Tyr); 8.47 (d, *J* = 8.4 Hz, 1H, Tyr); 8.05-8.13 (app.m, 4H, 2H of Leu + 1H of Ala + 1H of Thr); 7.87 (d, *J* = 9.3 Hz, 1H, Val); 7.60 (d, *J* = 8.7 Hz, 1H, Val); 7.05 (d, *J* = 8.4 Hz, 1H, Tyr); 6.62 (d, *J* = 8.4 Hz, 1H, Tyr); 4.87-4.97 (m, 1H, Thr); 4.53-4.64 (m, 1H, Tyr); 4.30-4.40 (m, 2H, 2H of each Val); 4.22-4.30 (m, 1H, Leu); 4.10-4.21 (m, 3H, 2H of Thr + 1H of Ala); 3.82-3.90 (m, 1H, Pro); 3.55-3.65 (m, 1H, Pro); 2.62-2.75 (m, 2H, Tyr); 1.80-2.00 (m, 5H, 2H of each Val + 3H of Pro); 1.55-1.65 (m, 1H, Leu); 1.45-1.55 (m, 2H, Leu); 1.23 (d, *J* = 7.2 Hz, 3H, Ala); 1.01 (d, *J* = 6.0 Hz, 3H, Thr); 0.70-0.90 (m, 18H, 6H of Leu + 12H of each Val). HRMS (FAB) Calcd. For C37H60N7O10 : 762.4402. Observed m/z 762.4416 HPLC (tR, min) system A: 14.9 system B: 17.6

**Peptide 12 (LVVYPWA)**


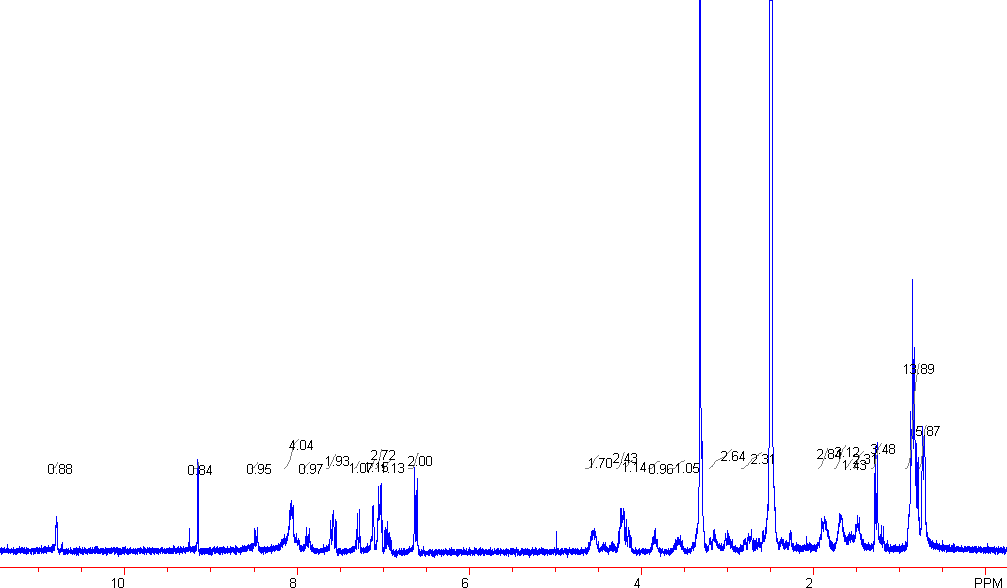

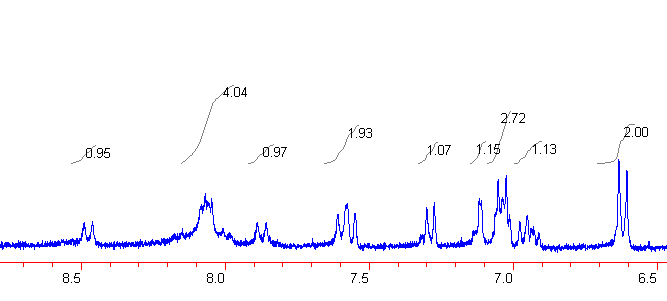

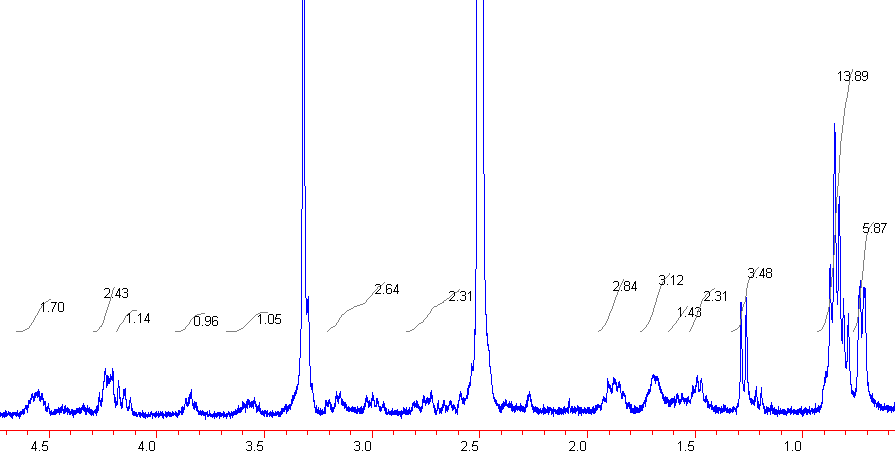


1H-NMR (DMSO-*d6*, 300 MHz) δ 10.80 (s, 1H, Trp); 9.15 (s, 1H, Tyr); 8.46 (d, *J* = 8.4 Hz, 1H, Tyr); 8.00-8.20 (m, 4H, 2H of Leu + 2H of each Val); 7.88 (d, *J* = 9.6 Hz, 1H, Thr); 7.60 (d, *J* = 7.8 Hz, 1H, Trp); 7.55 (d, *J* = 8.1 Hz, 1H, Trp); 7.27 (d, *J* = 8.1 Hz, 1H, Trp); 7.11 (s, 1H, Trp); 7.03 (d, *J* = 8.7 Hz, 2H, Tyr); 7.00-7.02 (m, 1H, Trp); 6.95 (m, 1H, Trp); 6.60 (d, *J* = 8.7 Hz, 2H, Tyr); 4.50-4.60 (m, 2H, 1H of Trp + 1H of Tyr); 4.20-4.30 (m, 3H, 1H of Leu + 1H of Ala + 1H of Val); 4.12-4.18 (dd, *J* = 9.6, 8.4 Hz, 1H, Val); 3.80-3.90 (m, 1H, Pro); 3.52-3.62 (m, 1H, Pro); 3.12-3.22 (m, 1H, Trp); 2.97-3.05 (m, 1H, Trp); 2.60-2.82 (m, 2H, Tyr); 1.81-1.93 (m, 3H, 1H of Pro + 2H of each Val); 1.65-1.75 (m, 3H, 2H of Val + 1H of other Val); 1.53-1.61 (m, 1H, Leu); 1.45-1.52 (m, 2H, Leu); 1.27 (d, *J* = 7.2 Hz, 3H, Ala); 0.70-0.90 (m, 18H, 6H of Leu + 12H of each Val). HRMS (FAB) Calcd. For C44H63N8O9: 847.4718. Observed m/z 847.4716 HPLC (tR, min) system A: 20.0 system B: 25.2

**Peptide 13 (cyclic LVVYPWT)**


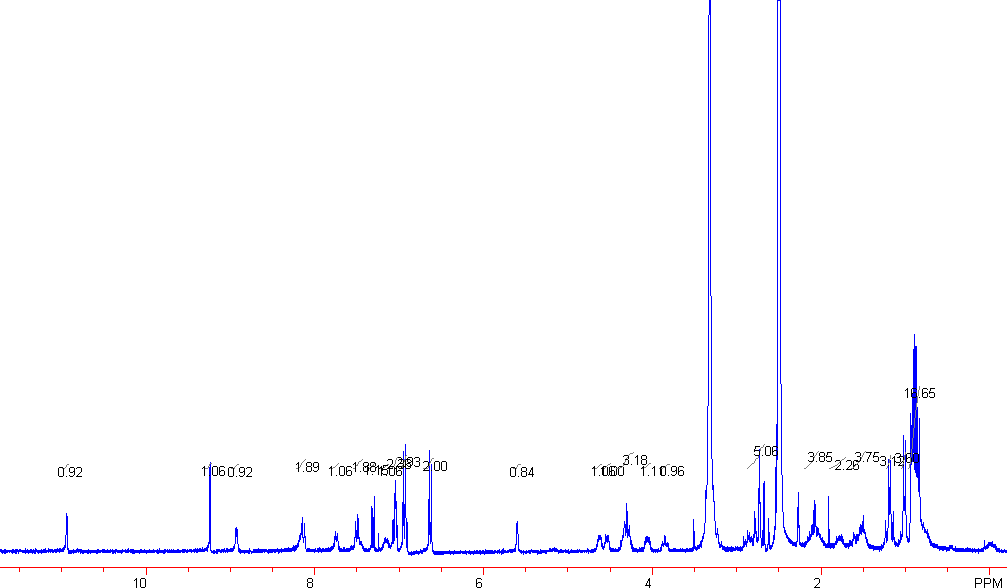

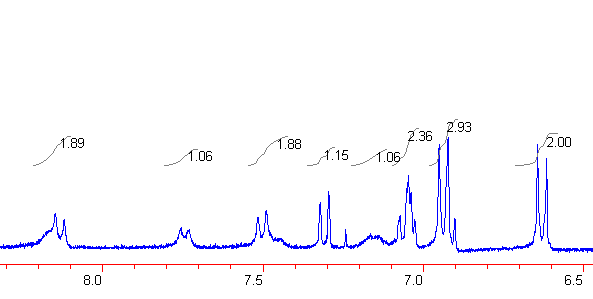

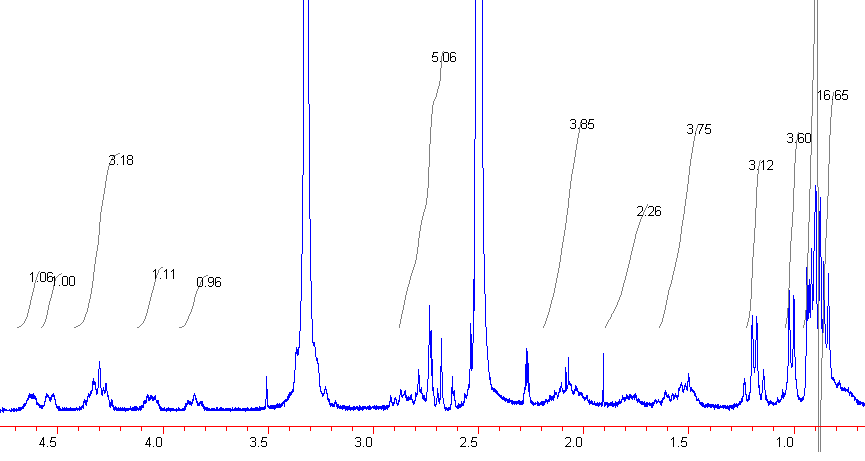


1H-NMR (DMSO-*d6*, 300 MHz) δ10.93 (s, 1H, Trp); 9.24 (s, 1H, Tyr); 8.91 (d, *J* = 4.5 Hz, 1H, Tyr); 8.15 (d, *J* = 9.3 Hz, 1H, Trp); 7.76 (d, *J* = 9.6 Hz, 1H, Thr); 7.52 (d, *J* = 7.5 Hz, 1H, Val); 7.49 (d, *J* = 7.5 Hz, 1H, Val); 7.32 (d, *J* = 7.5 Hz, 1H, Trp); 7.25 (s, 1H, Trp); 7.07 (d, *J* = 7.8 Hz, 1H, Trp); 6.92 (d, *J* = 8.4 Hz, 2H, Tyr); 6.90 (1H, Trp); 6.64 (d, *J* = 8.4 Hz, 2H, Tyr); 5.59 (s, 1H, Leu), 4.64 (m, 1H, Tyr); 4.55 (m, 1H, Trp); 4.22-4.41 (m, 4H, 1H of Leu + 2H of each Val + 1H of Thr); 4.06 (m, 1H, Thr); 3.85 (m, 1H, Pro); 2.62-2.91 (m, 4H, 2H of Trp + 2H of Tyr); 2.10-2.20 (m, 2H, each Val); 1.98-2.10 (m, 2H, Pro); 1.82 (m, 2H, Pro); 1.63 (m, 1H, Leu); 1.50 (m, 2H, Leu); 1.23 (d, *J* = 6.3 Hz, 3H, Thr); 0.78-1.02 (m, 12H of each Val + 6H of Leu). MS (MALDI-TOF) Calcd. For C45H62N8O9: 859.0. Observed m/z 859.3 HPLC (tR, min) system A: 26.3 system B: 30.2

**Peptide 14 (cyclic AVVYPWT)**


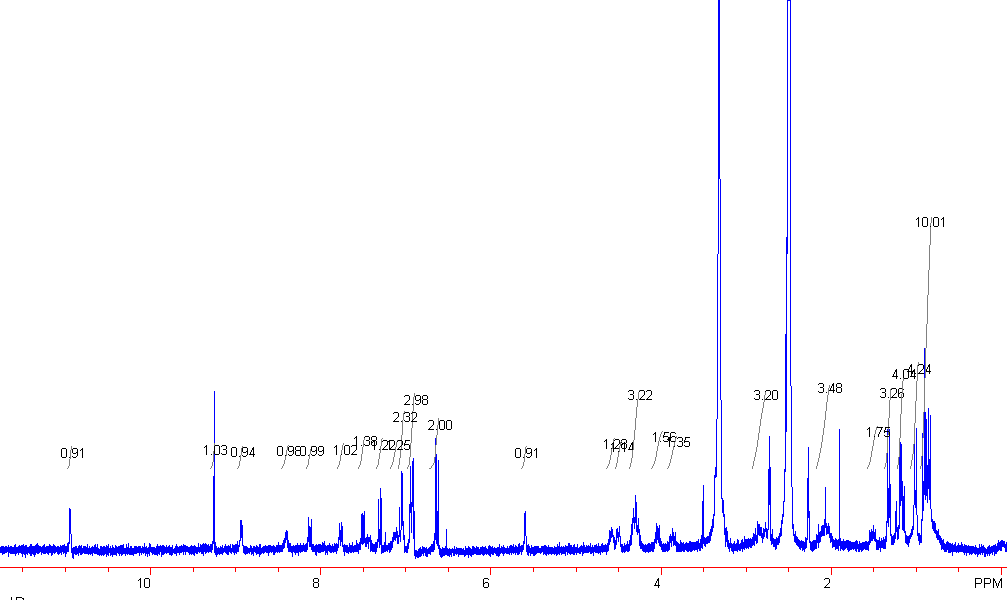

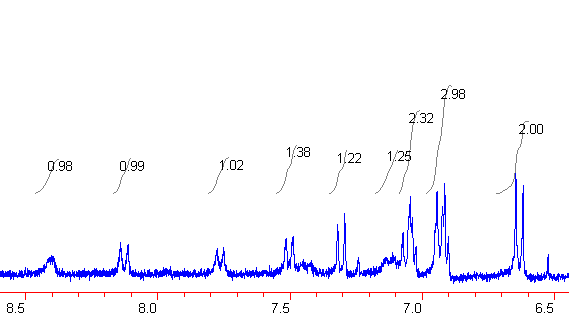

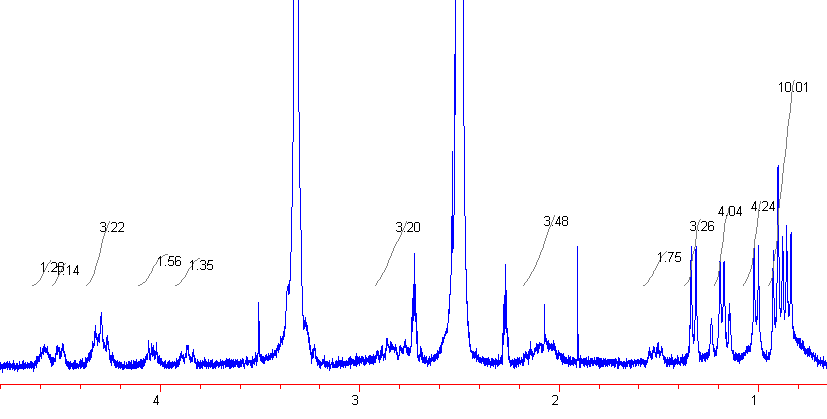


1H-NMR (DMSO-*d6*, 300 MHz) δ10.95 (s, 1H, Trp); 9.25 (s, 1H, Tyr); 8.94 (d, *J* = 4.8 Hz, 1H, Tyr); 8.41 (bs, 1H, Thr); 8.14 (d, *J* = 8.1 Hz, 1H, Trp); 7.78 (d, *J* = 7.2 Hz, 1H, Val); 7.49 (d, *J* = 7.8 Hz, 1H, Val); 7.29 (d, *J* = 8.1 Hz, 1H, Trp); 7.13 (s, 1H, Trp); 7.06 (d, *J* = 8.1 Hz, 1H, Trp); 7.02 (d, *J* = 4.2 Hz, 1H, Trp); 6.94 (d, *J* = 8.4 Hz, 2H, Tyr); 6.65 (d, *J* = 8.4 Hz, 2H, Tyr); 5.59 (s, 1H, Ala); 4,61 (m, 1H, Tyr); 4.50 (m, 1H, Trp); 4.20-4.38 (m, 3H, 1H of Ala + 2H of each Val); 4.01 (m, 1H, Thr); 3.85 (m, 1H, Pro); 2.80 (m, 2H, Tyr); 2.01-2.21 (m, 2H, Pro); 1.50-1.59 (m, 2H, Pro); 1.31 (d. *J* = 7.2 Hz, 3H, Thr); 1.16 (d, *J* = 6.0 Hz, 3H, Ala); 0.78-1.02 (m, 12H, 12H of each Valine). MS (MALDI-TOF) Calcd. For C42H56N8O9: 816.9 Observed m/z 817.7 HPLC (tR, min) system A: 22.2 system B: 25.7


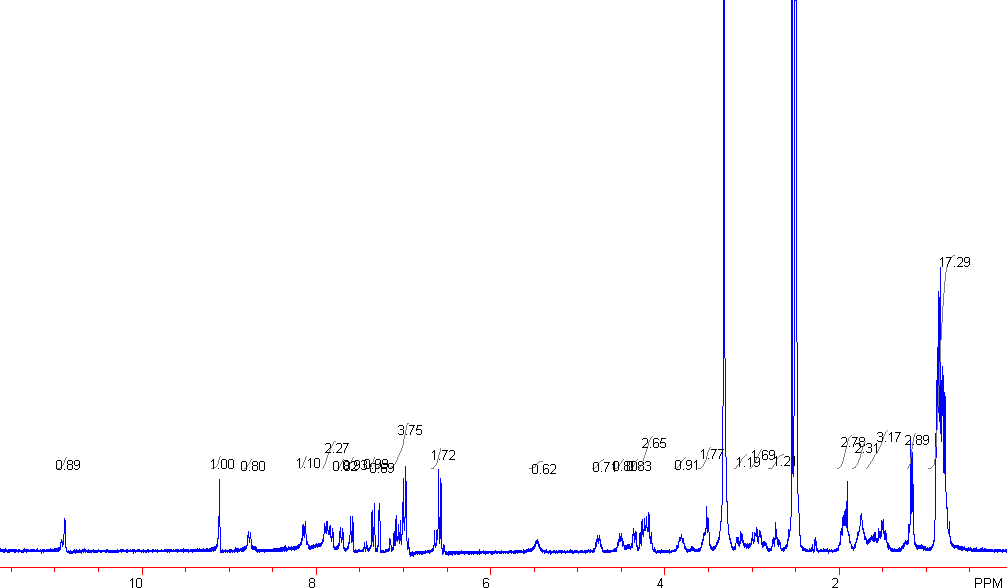

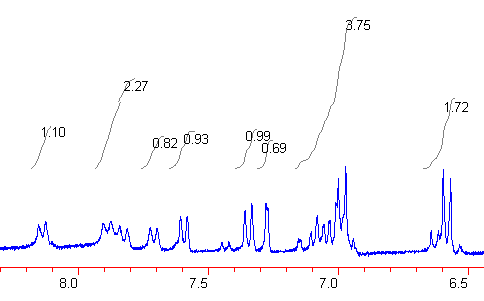

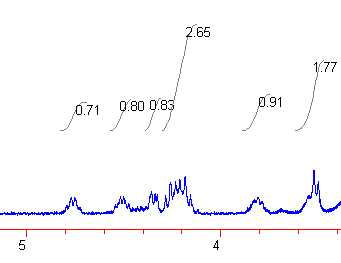

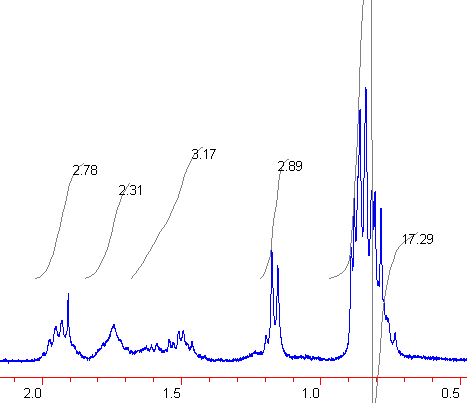


**Peptide 15 (D)-TWPYVVL**

1H-NMR (DMSO-*d6*, 300 MHz) δ 10.88 (s, 1H, Trp); 9.11 (s, 1H, Tyr); 8.77 (d, *J* = 7.2 Hz, 1H, Tyr); 8.13 (d, *J* = 7.2 Hz, 1H, Trp); 7.87 (d, *J* = 9.0 Hz, 1H, Leu); 7.82 (d, *J* = 9.0 Hz, 1H, Val); 7.70 (d, *J* = 7.8 Hz, 1H, Val); 7.58 (d, *J* = 7.8 Hz, 1H, Trp); 7.33 (d, *J* = 7.8 Hz, 1H, Trp); 7.27 (s, 1H, Trp); 7.04-7.12 (m, 1H, Trp); 7.00 (d, *J* = 8.4 Hz, 2H, Tyr); 6.90-7.00 (m, 1H, Trp); 6.60 (d, *J* = 8.4 Hz, 2H, Tyr); 5.40-5.52 (m, 1H, Thr); 4.72-4.80 (m, 1H, Tyr); 4.46-4.55 (m, 1H, Trp); 4.32-4.38 (m, 1H, Leu); 4.16-4.30 (m, 3H, 1H of Thr + 2H of each Val); 3.76-3.84 (m, 1H, Pro); 3.48-3.50 (m, 2H, Pro); 3.08-3.17 (m, 1H, Trp); 2.91-3.00 (m, 1H, Trp); 2.82-3.00 (m, 1H, Tyr); 2.67-2.75 (m, 1H, Tyr); 1.88-2.00 (m, 3H, 1H of Pro + 2H of each Val); 1.70-1.80 (m, 3H, Pro); 1.57-1.66 (m, 1H, Leu); 1.45-1.53 (m, 2H, Leu); 1.18 (d, *J* = 6.0 Hz, 3H, Thr); 0.74-0.90 (m, 18H, 6H of Leu + 12H of each Val). HRMS (FAB) Calcd. For C45H65N8O10 : 877.4824. Observed m/z 877.4805 HPLC (tR, min) system A: 23.1 system B: 26.1

**Peptide 16 (VYP)**

1H-NMR (DMSO-*d6*, 300 MHz) δ12.51 (s, 1H, Pro); 9.23 (s, 1H, Tyr); 8.66 (d, *J* = 7.8 Hz, 1H, Tyr); 7.98 (bs, 2H, Val); 7.12 (d, *J* = 8.4 Hz, 2H, Tyr); 6.67 (d, *J* = 8.4 Hz, 2H, Tyr); 4.62 (m, 1H, Tyr); 4.21 (d, *J* = 4.5 Hz, 1H, Pro); 3.72 (m, 1H, Val); 3.58 (m, 2H, Pro); 3.44 (m, 1H, Val); 2.73 (d, *J* = 5.7 Hz, 2H, Tyr); 2.09 (m, 3H, 1H of Pro + 1H of Val); 1.80-1.92 (m, 3H, Pro); 0.89 (m, 6H, Val). MS (MALDI-TOF) Calcd. For C19H27N3O5 : 377.4 Observed m/z 377.7 HPLC (tR, min) system A: 11.9

**Peptide 17 (VYPW)**

1H-NMR (DMSO-*d6*, 300 MHz) δ12.61 (s, 1H, Trp); 10.85 (s, 1H, Trp); 9.28 (s, 1H, Tyr); 8.66 (d, *J* = 7.5 Hz, 1H, Tyr); 7.99 (d, *J* = 7.5 Hz, 1H, Trp); 7.56 (d, *J* = 7.8 Hz, 1H, Trp); 7.33 (d, *J* = 8.4 Hz, 1H, Trp); 7.18 (s, 1H, Trp); 7.11 (d, *J* = 8.4 Hz, 2H, Tyr); 7.03 (m, 1H, Trp); 6.98 (m, 1H, Trp); 6.64 (d, *J* = 8.4 Hz, 2H, Tyr); 4.61 (m, 1H, Tyr); 4.52 (m, 2H, 1H of Val + 1H of Trp); 4.41 (m, 1H, Pro); 3.71 (m, 2H, Pro); 3.13 (m, 2H, Trp); 2.60-2.81 (m, 2H, Tyr); 2.07 (m, 2H, Pro); 1.78-1.82 (m, 3H, 1H of Val + 2H of Pro); 0.94 (dd, *J* = 6.6, 7.2 Hz, 6H, Val). MS (MALDI-TOF) Calcd. For C30H37N5O6 : 563.7 Observed m/z 562.8 HPLC (tR, min) system A: 18.2

**Peptide 18 (VYPWT)**

1H-NMR (DMSO-*d6*, 300 MHz) δ10.79 (s, 1H, Trp); 9.24 (s, 1H, Tyr); 8.64 (d, *J* = 7.8 Hz, 1H, Tyr); 7.84 (d, *J* = 7.8 Hz, 1H, Trp); 7.76 (d, *J* = 8.4 Hz, 1H, Thr); 7.59 (d, *J* = 7.8 Hz, 1H, Trp); 7.28 (d, *J* = 8.4 Hz, 1H, Trp); 7.15 (s, 1H, Trp); 7.09 (d, *J* = 8.4 Hz, 2H, Tyr); 7.01 (t, *J* = 6.9 Hz, 1H, Trp); 6.92 (m, 1H, Trp); 6.65 (d, *J* = 8.4 Hz, 2H, Tyr); 4.68 (m, 1H, Tyr); 4.57 (m, 1H, Pro); 4.49 (m, 1H, Val); 4.33 (m, 1H, Trp); 4.24 (dd, *J* = 3.3 Hz, 1H, Thr); 4.13 (m, 1H, Thr); 3.51 (m, 2H, pro); 3.17 (d, *J* = 5.4 Hz, 2H, Trp); 3.05 (d, *J* = 7.8 Hz, 2H, Tyr); 2.08 (m, 1H, Val); 1.76-1.91 (m, 4H, Pro); 1.05 (d, *J* = 6.6 Hz, 3H, Thr); 0.83-1.02 (m, 6H, Val). MS (MALDI-TOF) Calcd. For C34H44N6O8 : 664.8 Observed m/z 664.2 HPLC (tR, min) system A: 18.9

**Peptide 19 (YPW)**

1H-NMR (DMSO-*d6*, 300 MHz) δ12.70 (s, 1H, Trp); 10.86 (s, 1H, Trp); 9.35 (s, 1H, Tyr); 8.18 (d, *J* = 7.5 Hz, 1H, Trp); 8.01 (s, 2H, Tyr); 7.58 (d, *J* = 8.7 Hz, 1H, Trp); 7.34 (d, *J* = 8.1 Hz, 1H, Trp); 7.21 (s, 1H, Trp); 7.14 (d, *J* = 8.4 Hz, 2H, Tyr); 7.06 (dd, *J* = 6.9, 7.2 Hz, 1H, Trp); 6.95 (m, 1H, Trp); 6.68 (d, *J* = 8.4 Hz, 2H, Tyr); 4.70-4.53 (m, 2H, 1H of Tyr + 1H of Trp); 4.22 (m, 1H, Pro); 3.57-3.65 (m, 2H, Pro); 3.09 (m, 2H, Trp); 2.76-2.99 (m, 2H, Tyr); 2.06 (m, 1H, Pro); 1.73-1.85 (m, 3H, 2H of Pro + 1H of Pro). MS (MALDI-TOF) Calcd. For C25H28N4O5 : 464.5 Observed m/z 464.7 HPLC (tR, min) system A: 18.8

**Peptide 20 (YPWT)**

1H-NMR (DMSO-*d6*, 300 MHz) δ12.63 (s, 1H, Thr); 10.80 (s, 1H, Trp); 9.36 (s, 1H, Tyr); 8.26 (d, *J* = 8.4 Hz, 1H, Trp); 8.01 (s, 2H, Tyr); 7.81 (d, *J* = 8.4 Hz, 1H, Thr); 7.64 (d, *J* = 7.2 Hz, 1H, Trp); 7.29 (d, *J* = 7.8 Hz, 1H, Trp); 7.20 (s, 1H, Trp); 7.12 (d, *J* = 8.4 Hz, 2H, Tyr); 7.02 (dd, *J* = 7.2, 8.4 Hz, 1H, Trp); 6.90 (m, 1H, Trp); 6.68 (d, *J* = 8.4 Hz, 2H, Tyr); 4.92 (m, 1H, Pro); 4.70 (m, 1H, Tyr); 4.42 (m, 1H, Trp); 4.25 (m, 1H, Thr); 4.15 (m, 1H, Thr); 3.57 (m, 2H, Pro); 3.11-3.28 (m, 2H, Trp); 2.73-3.11 (m, 2H, Tyr); 2.01 (m, 1H, Pro); 1.64-1.80 (m, 3H, 2H of Pro + 1H of Pro); 1.02 (d, *J* = 6.3 Hz, 3H, Thr). MS (MALDI-TOF) Calcd. For C29H35N5O7 : 565.6 Observed m/z 566.1 HPLC (tR, min) system A: 16.6

**Peptide 21 (PWT)**

1H-NMR (DMSO-*d6*, 300 MHz) δ10.84 (s, 1H, Trp); 8.73 (d, *J* = 8.1 Hz, 1H, Trp); 8.09 (d, *J* = 8.7 Hz, 1H, Trp); 7.71 (d, *J* = 8.1 Hz, 1H, Thr); 7.34 (d, *J* = 8.1 Hz, 1H, Trp); 7.20 (s, 1H, Trp); 7.07 (dd, *J* = 7.2, 8.7 Hz, 1H, Trp); 6.95 (dd, *J* = 7.2, 8.1 Hz, 1H, Trp); 5.02 (m, 1H, Pro); 4.79(m, 1H, Trp); 4.28 (dd, *J* = 3.0, 3.3 Hz, 1H, Thr); 4.19 (m, 1H, Thr); 4.07 (m, 1H, Pro); 3.16-3.24 (m, 2H, Trp); 2.98 (m, 1H, Pro); 2.27 (m, 1H, Pro); 1.81 (m, 2H, Pro); 1.07 (d, *J* = 6.3 Hz, 3H, Thr). MS (MALDI-TOF) Calcd. For C20H26N4O5 : 402.5 Observed 402.9 HPLC (tR, min) system A: 13.4

**Peptide 22 (VVYPWT)**

1H-NMR (DMSO-*d6*, 300 MHz) δ12.57 (s, 1H, Thr); 10.78 (s, 1H, Trp); 9.13 (s, 1H, Tyr); 8.30 (d, *J* = 7.8 Hz, 1H, Val); 8.18 (d, *J* = 9.0 Hz, 1H, Tyr); 7.99 (s, 2H, Val); 7.83 (d, *J* = 7.8 Hz, 1H, Trp); 7.74 (d, *J* = 8.4 Hz, 1h, Thr); 7.58 (d, *J* = 7.8 Hz, 1H, Trp); 7.31 (d, *J* = 8.4 Hz, 1H, Trp); 7.15 (s, 1H, Trp); 7.02-7.07 (m, 1H, Trp); 7.01 (d, *J* = 8.4 Hz, 2H, Tyr); ;6.93 (dd, *J* = 7.8, 8.4 Hz, 1H, Trp); 6.61 (d, *J* = 8.4 Hz, 2H, Tyr); 4.88 (m, 1H, Val); 4.65 (m, 1H, Tyr); 4.58 (m, 1H, Val); 4.32 (m, 1H, Pro); 4.25 (m, 1H, Trp); 4.20 (m, 1H, Thr); 4.11 (m, 1H, Thr); 3.53-3.67 (m, 2H, Pro); 3.17 (m, 2H, Trp); 3.02 (m, 1H, Pro); 2.61-2.82 (m, 2H, Tyr); 1.90-2.11 (m, 3H, 2H of each Val + 1H of Pro); 1.74 (m, 3H, 1H of Pro + 2H of Pro); 1.06 (d, *J* = 6.3 Hz, 3H, Thr); 0.80-0.92 (m, 12H, two Val). MS (MALDI-TOF) Calcd. For C39H53N7O9 : 763.9 Observed 763.9 HPLC (tR, min) system A: 19.4

**Mass spectra of peptide derivatives**


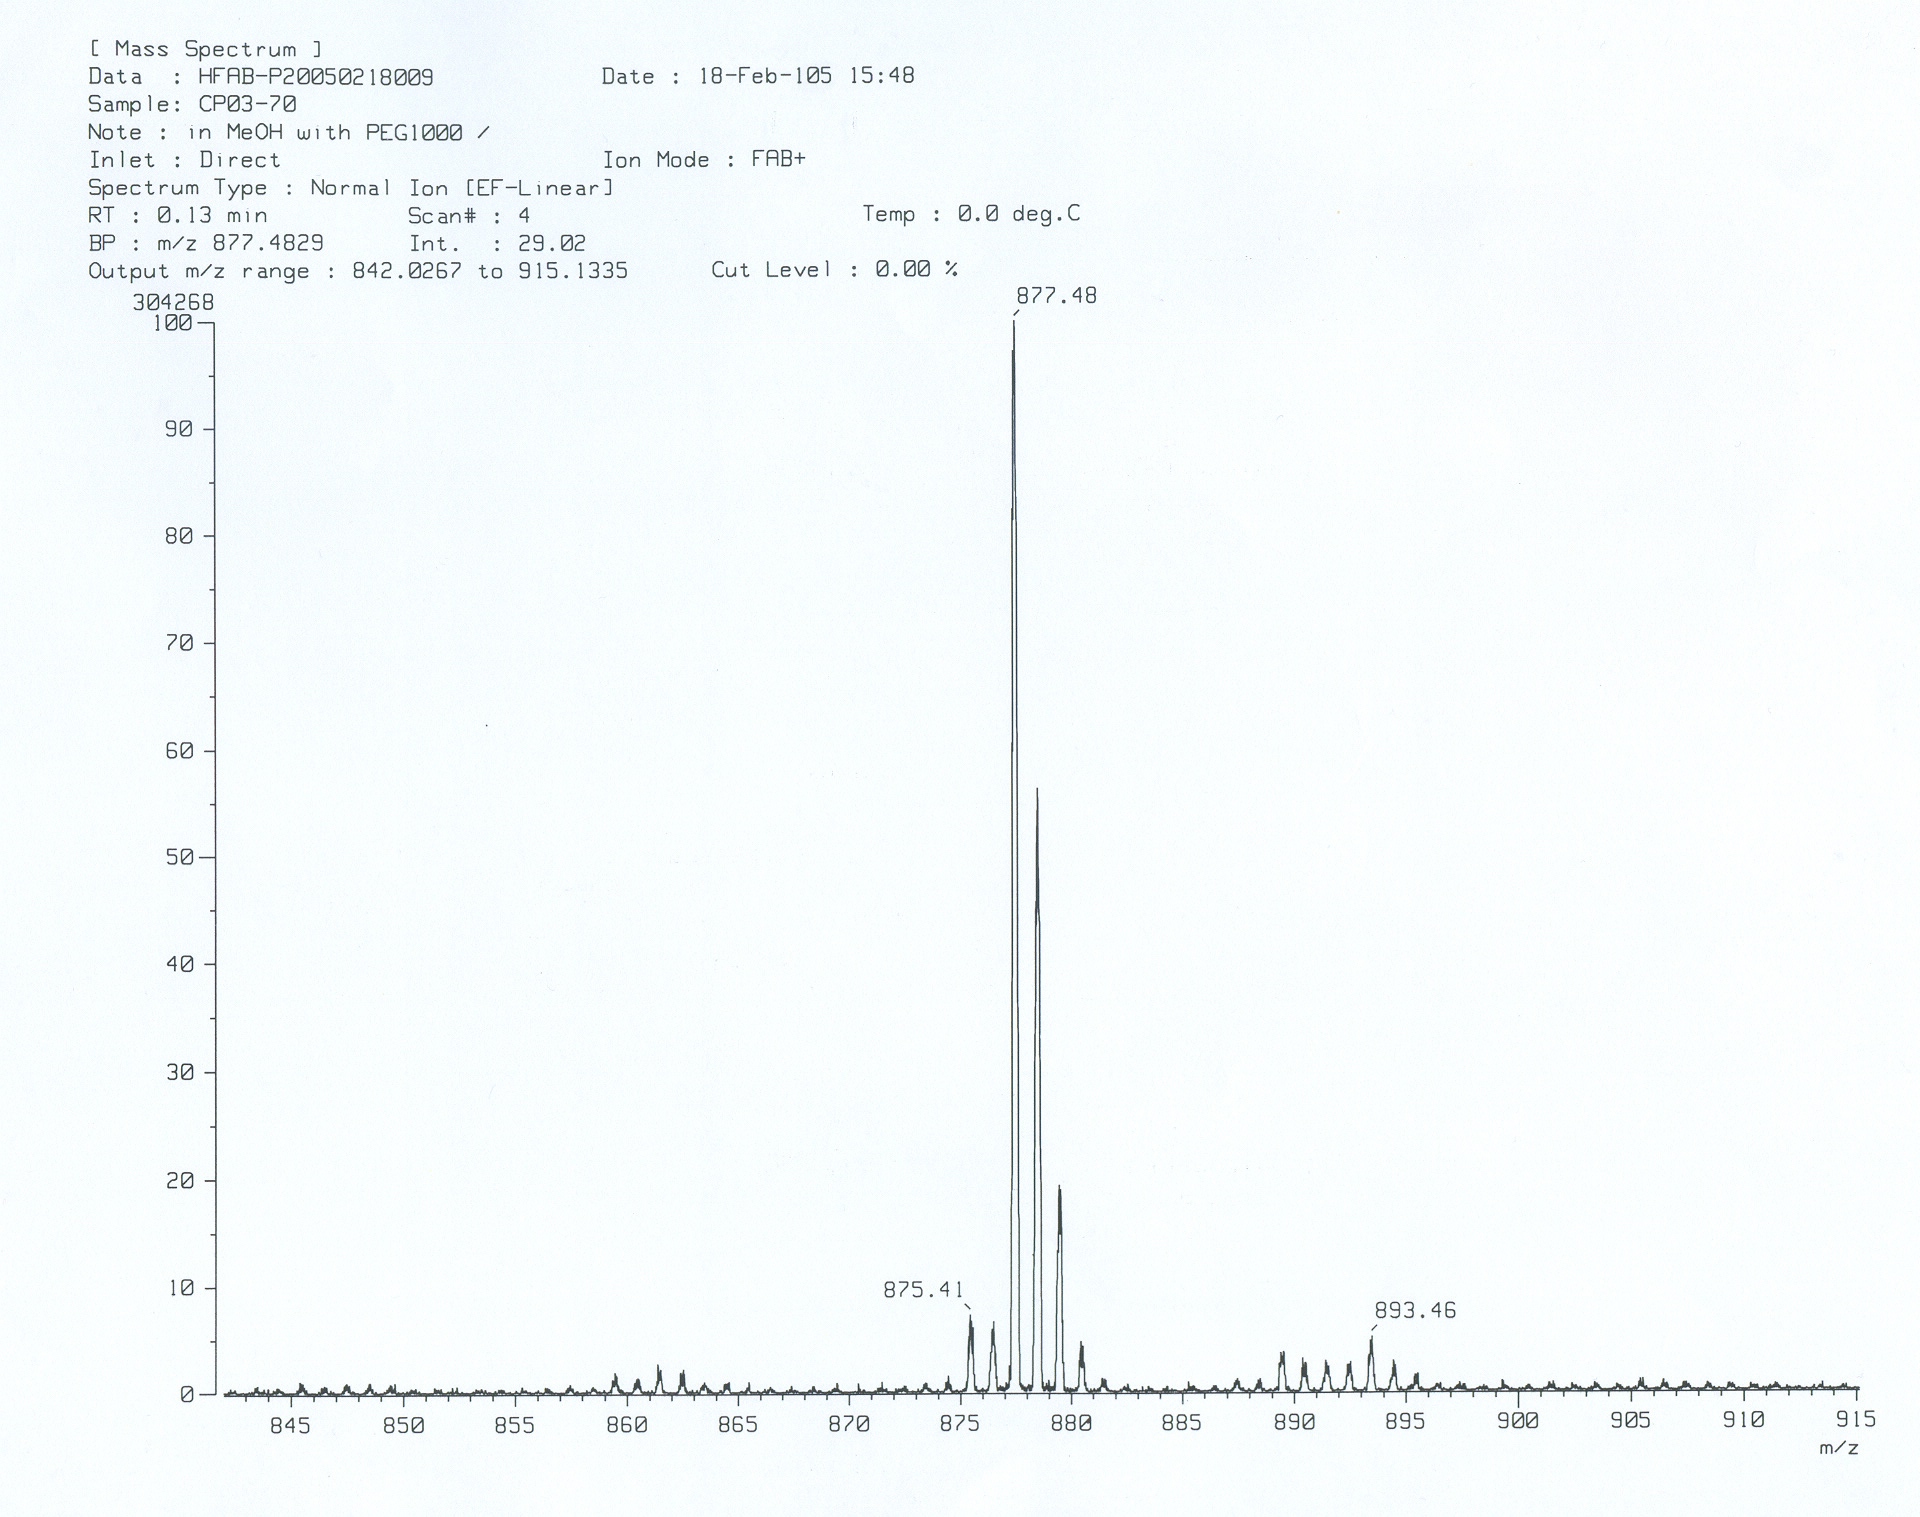

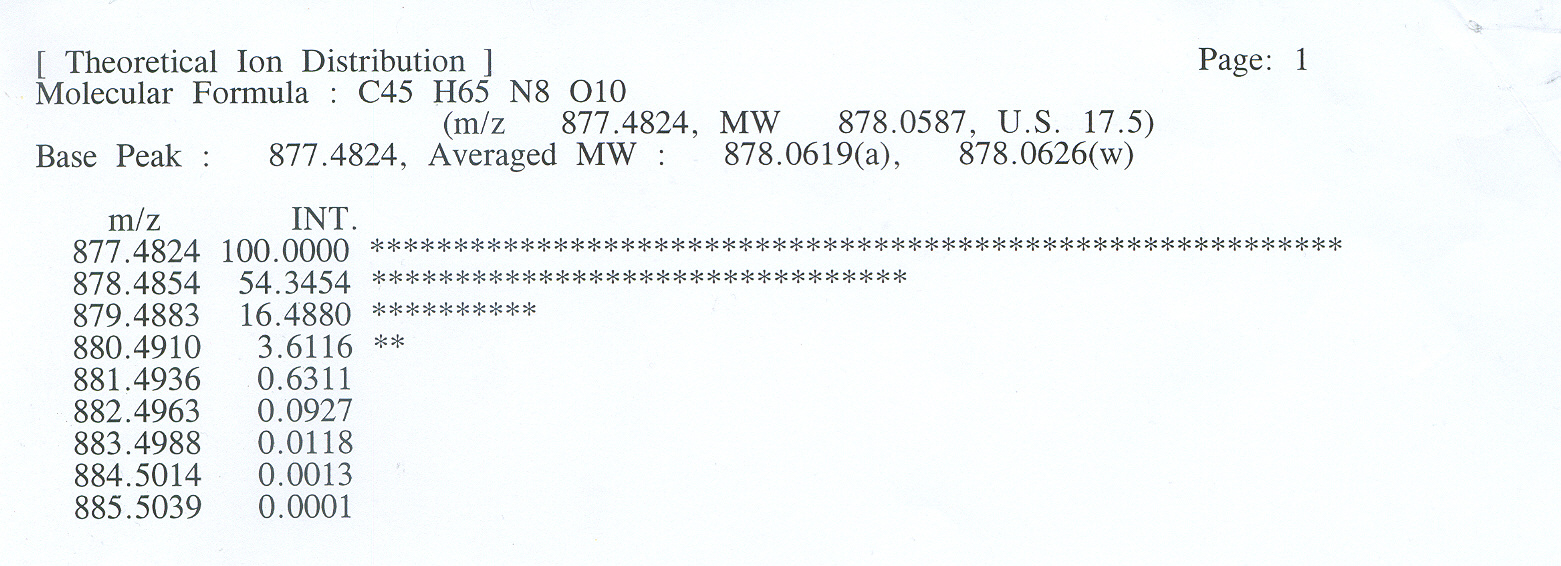

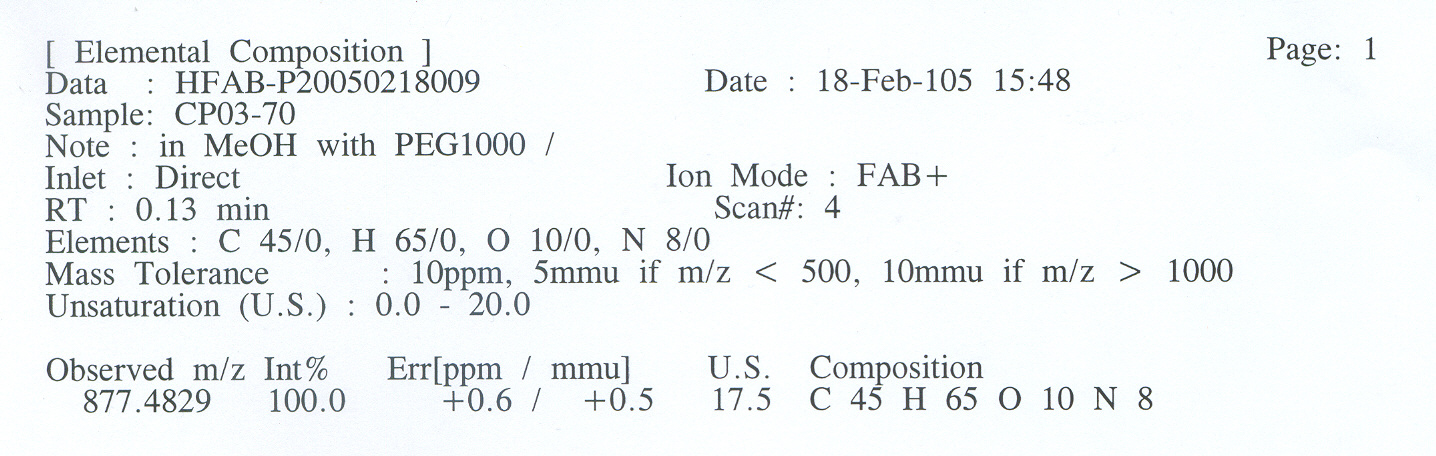


**Peptide 5 (LVVYPWT)**


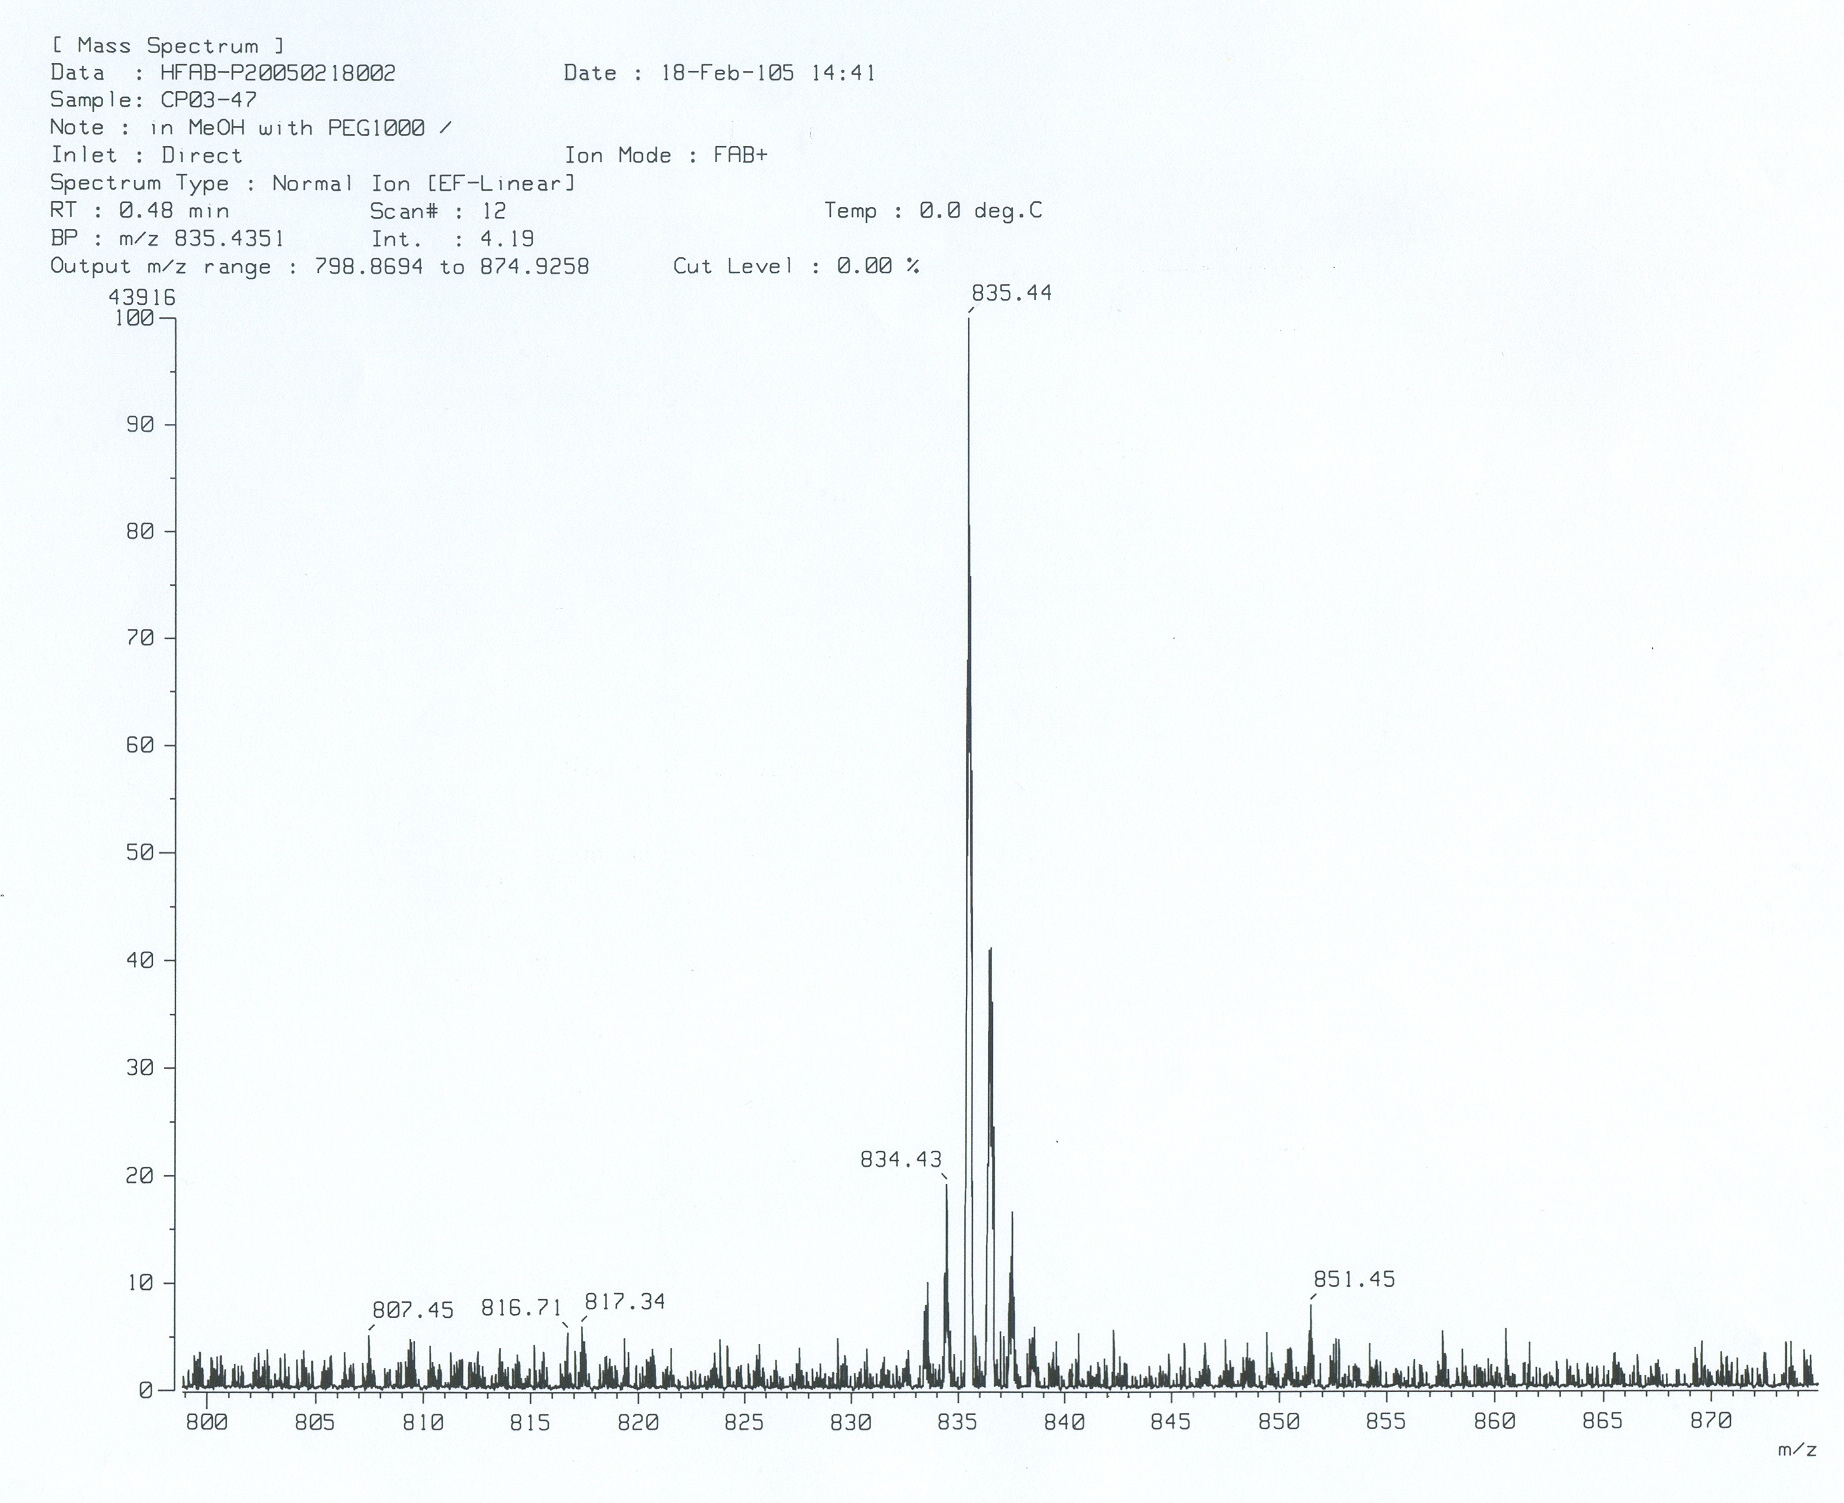

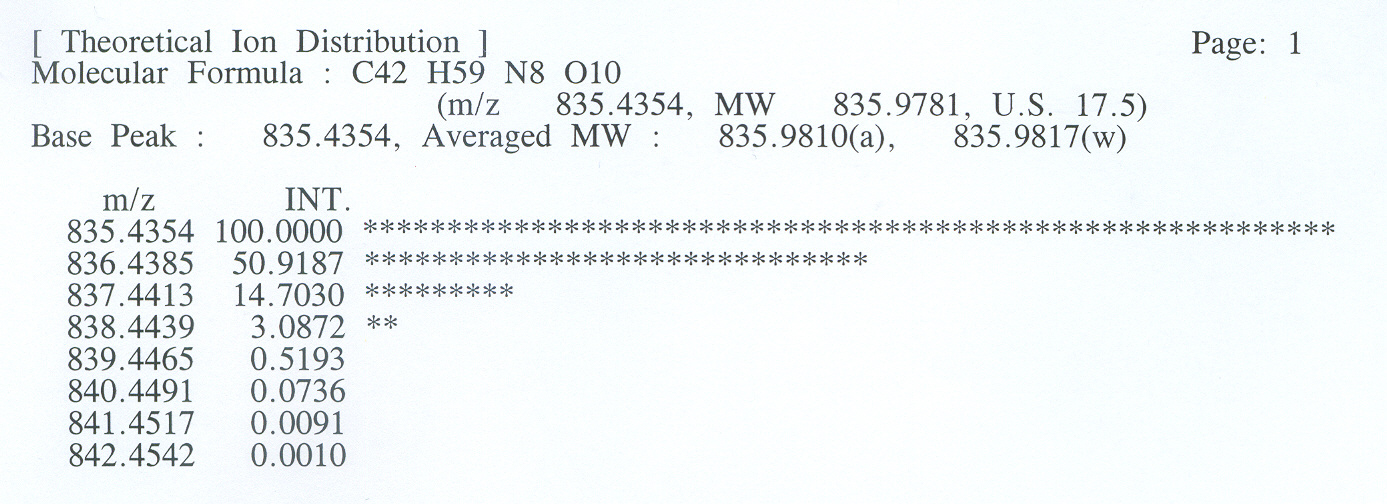

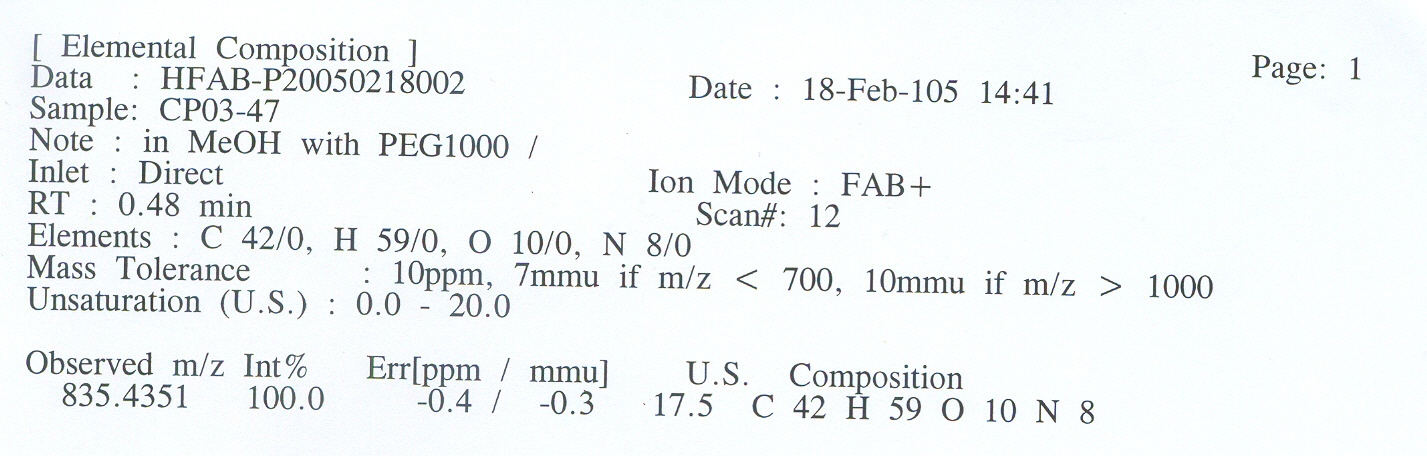


**Peptide 6 (AVVYPWT)**


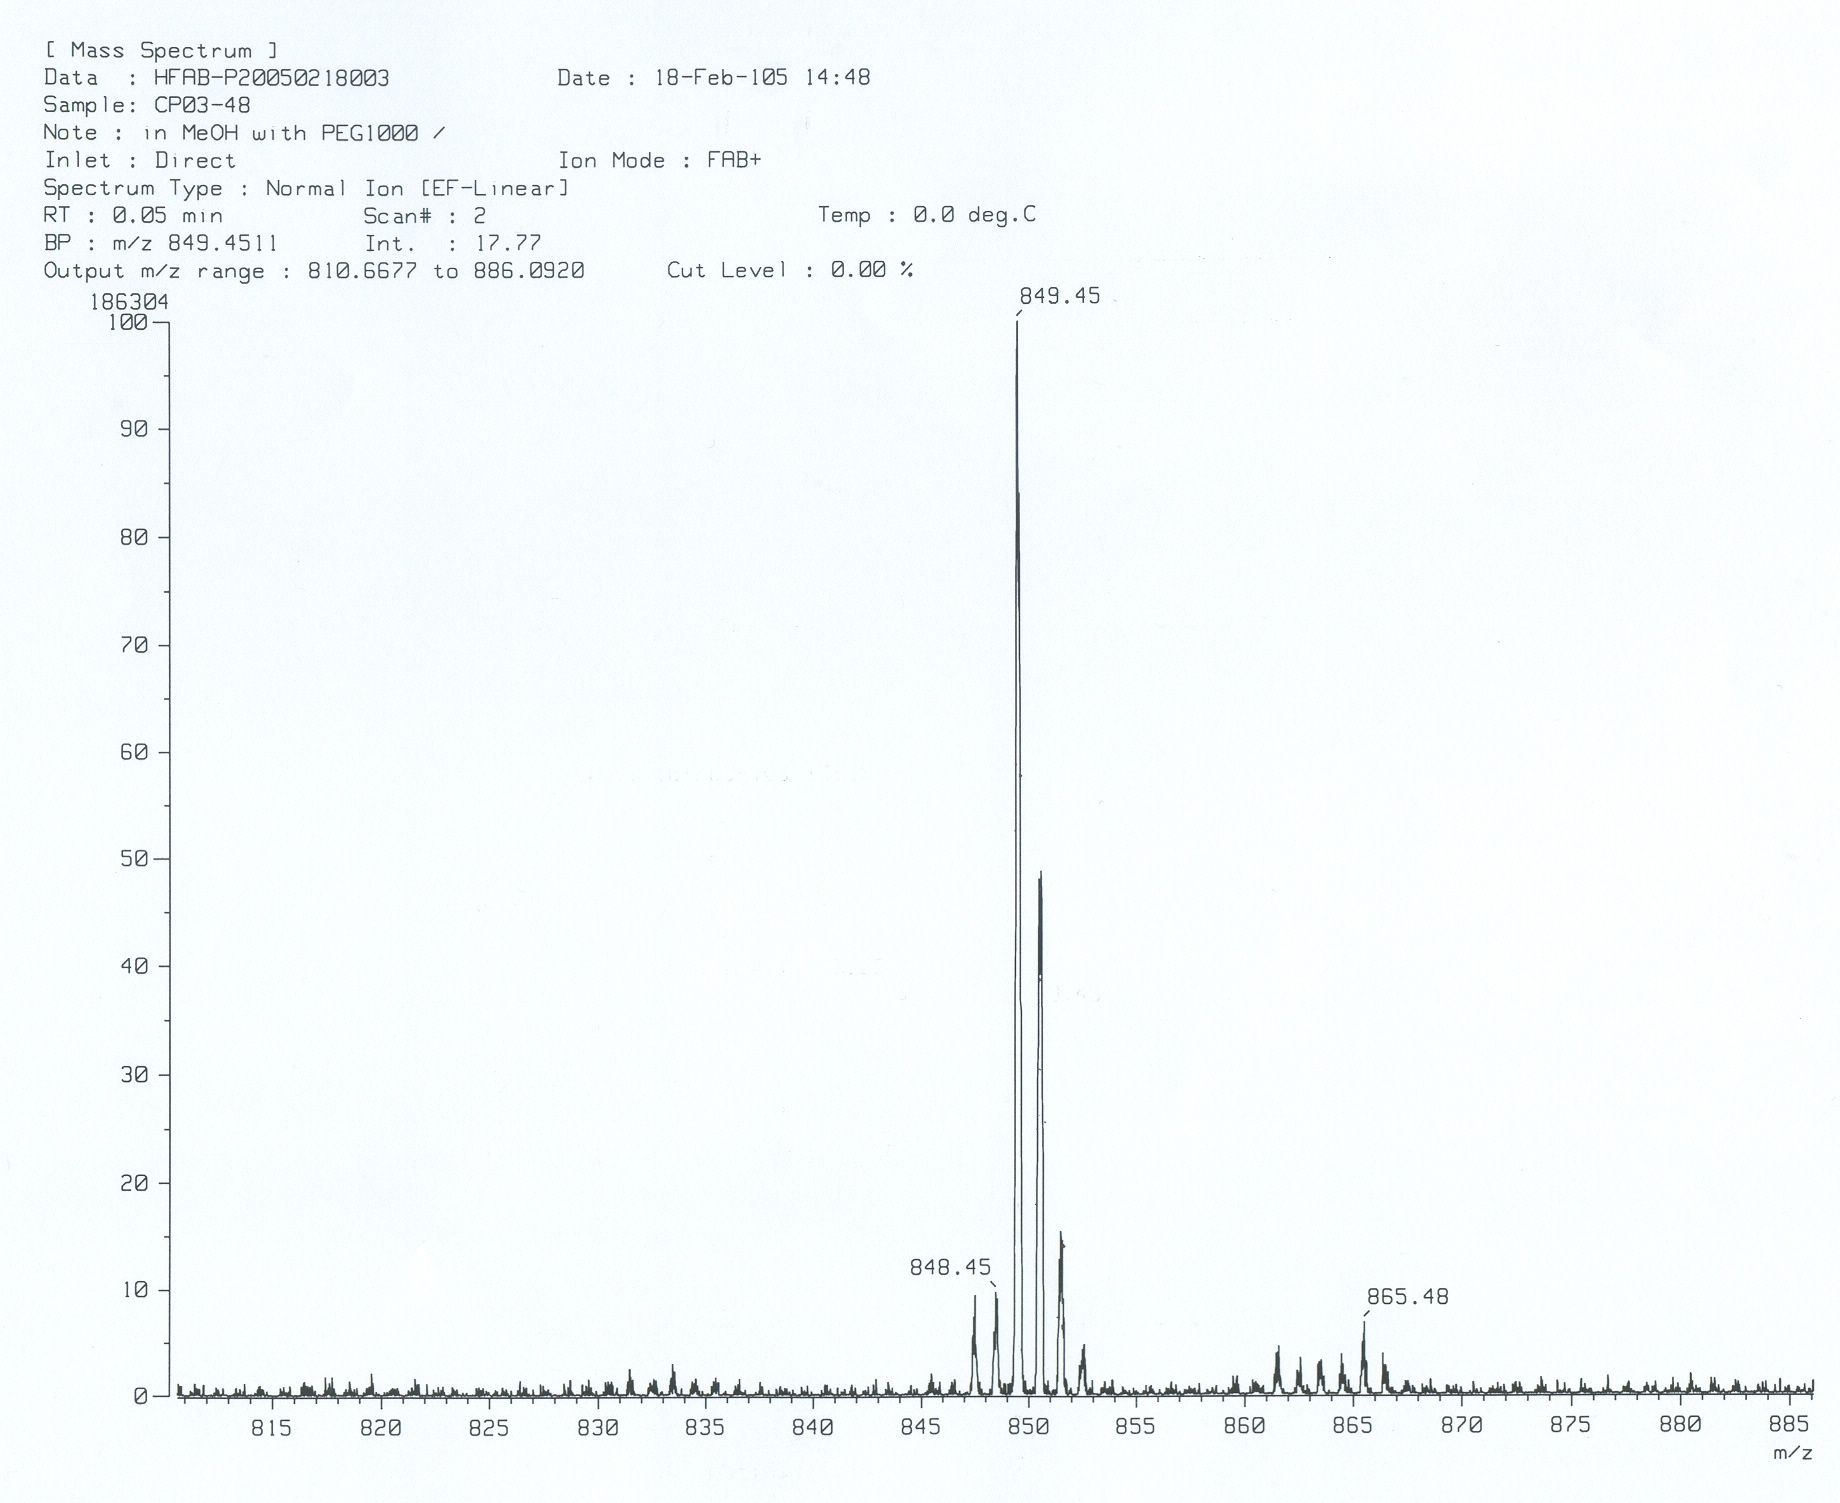

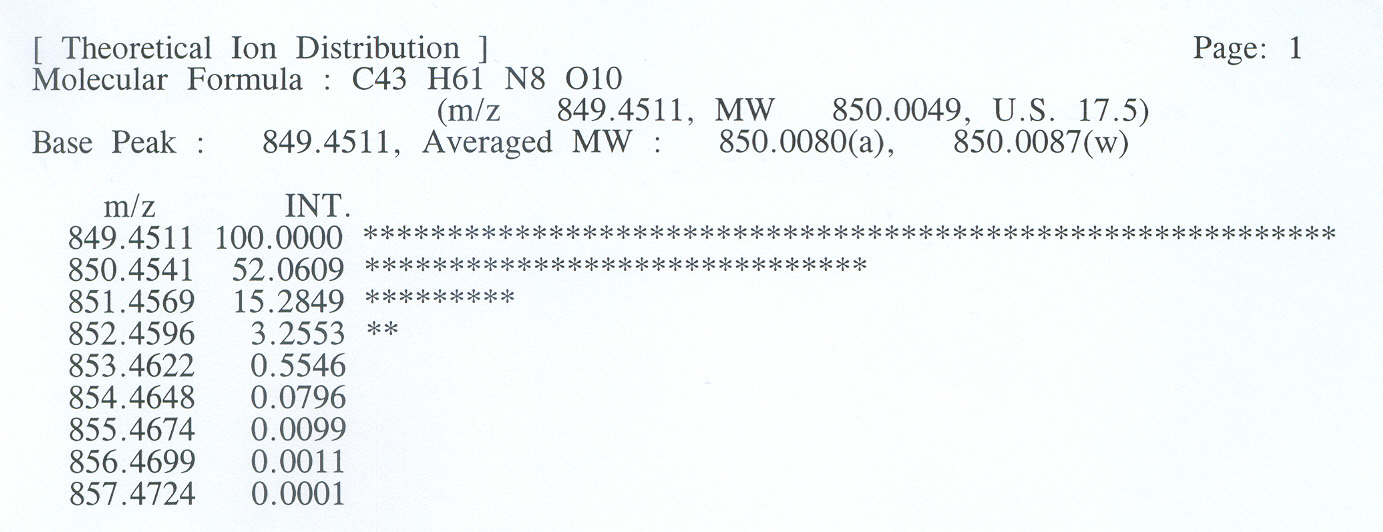

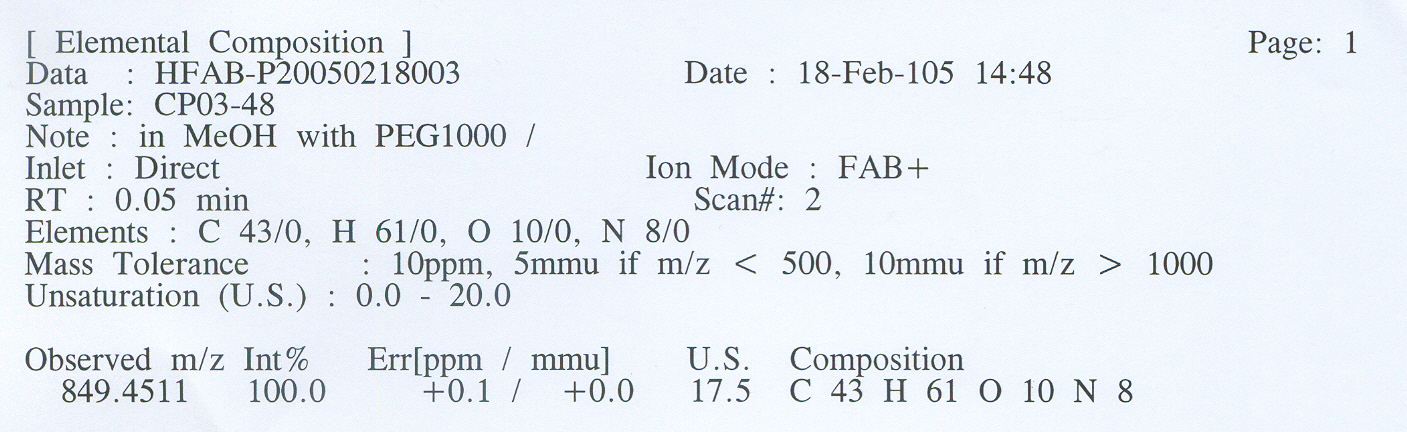


**Peptide 7 (LAVYPWT)**


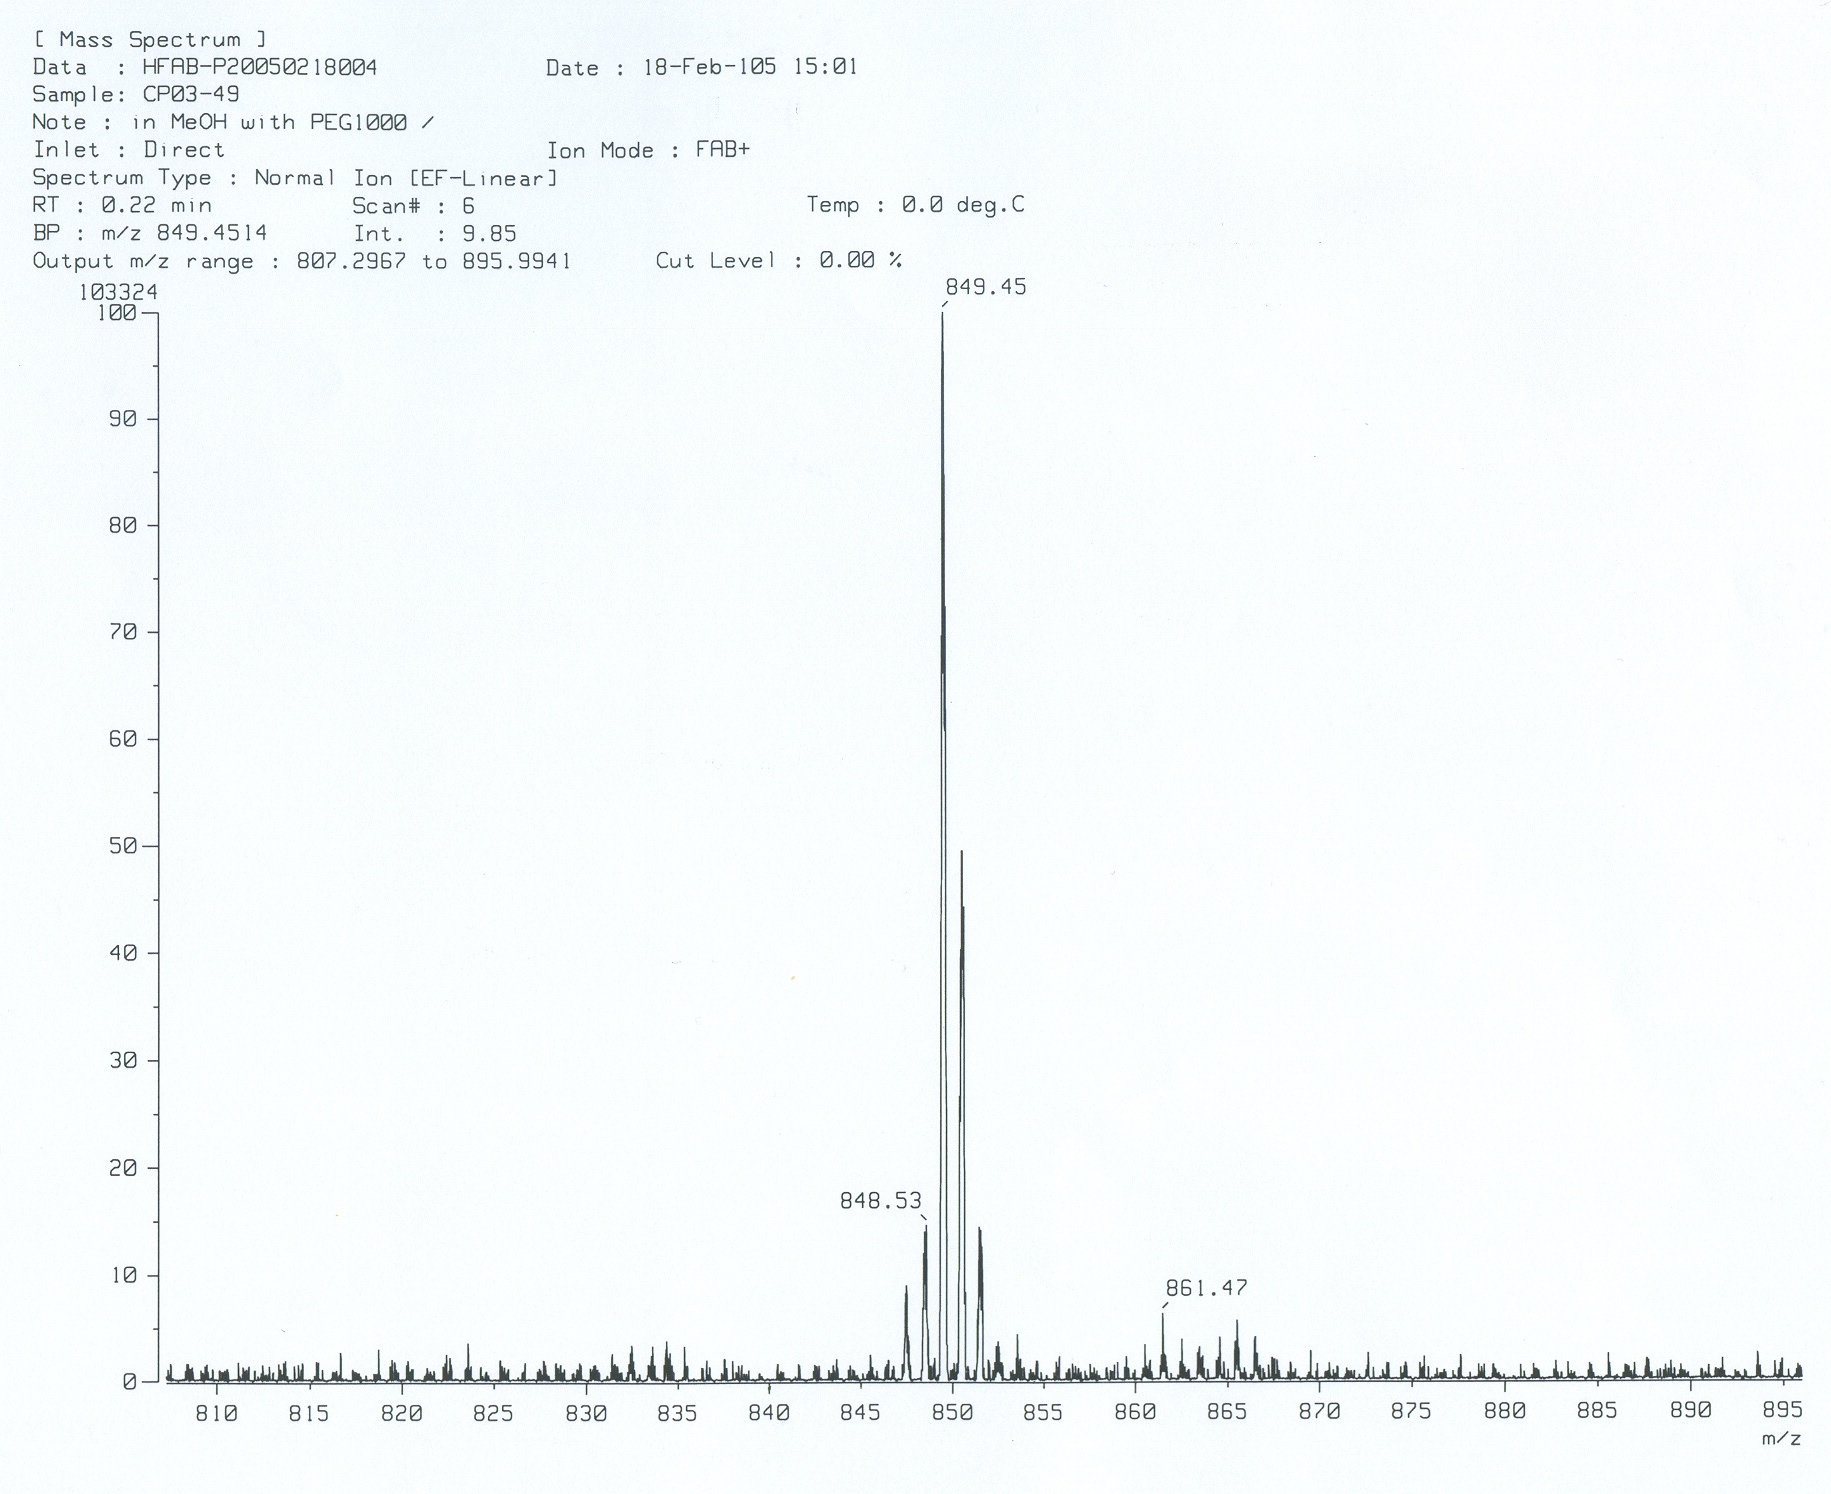

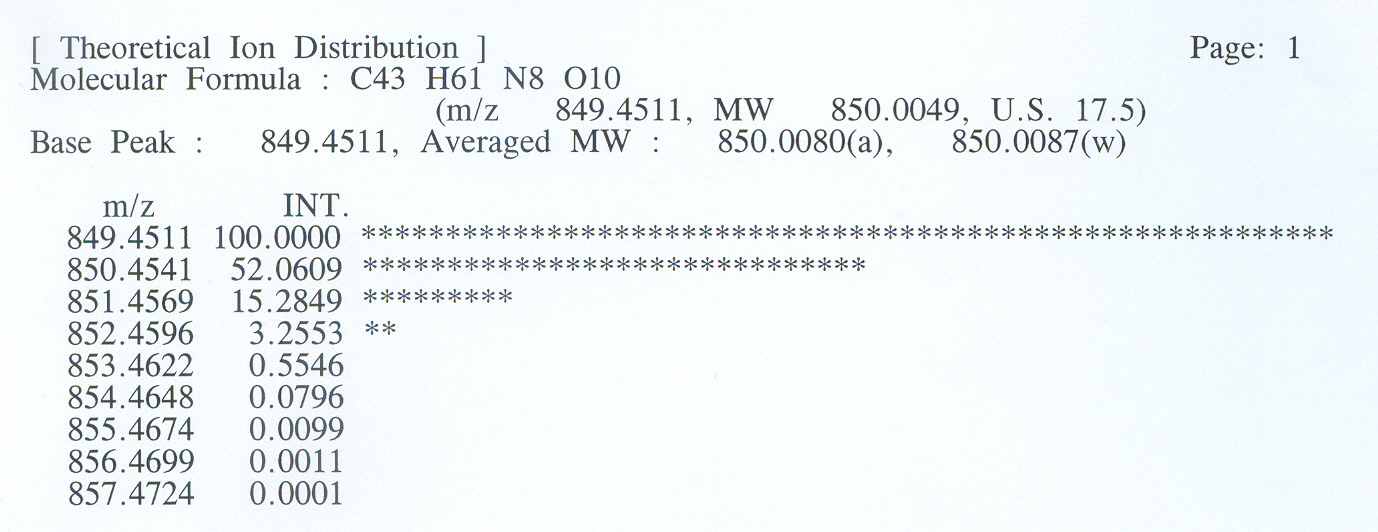

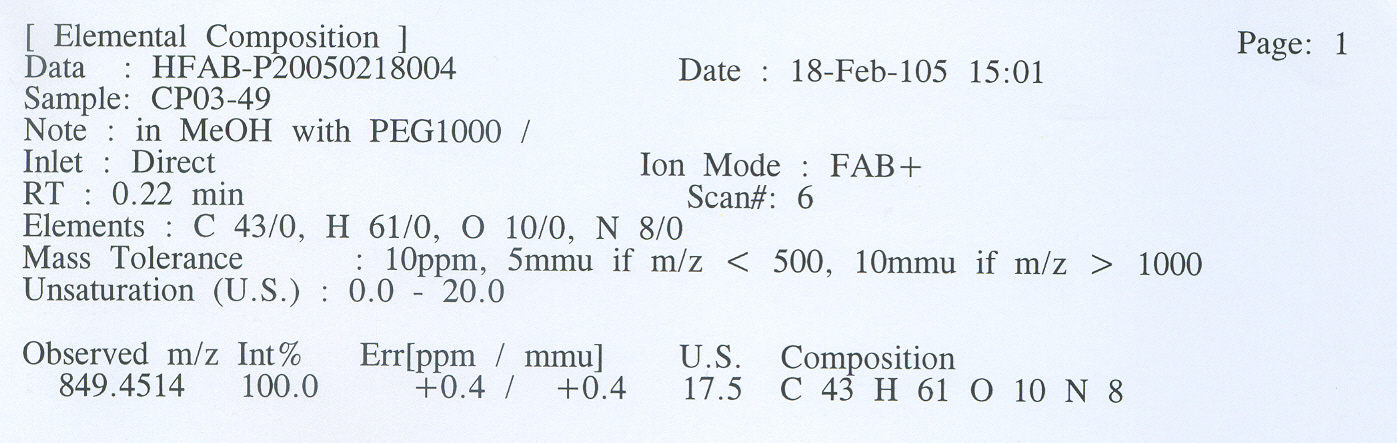


**Peptide 8 (LVAYPWT)**


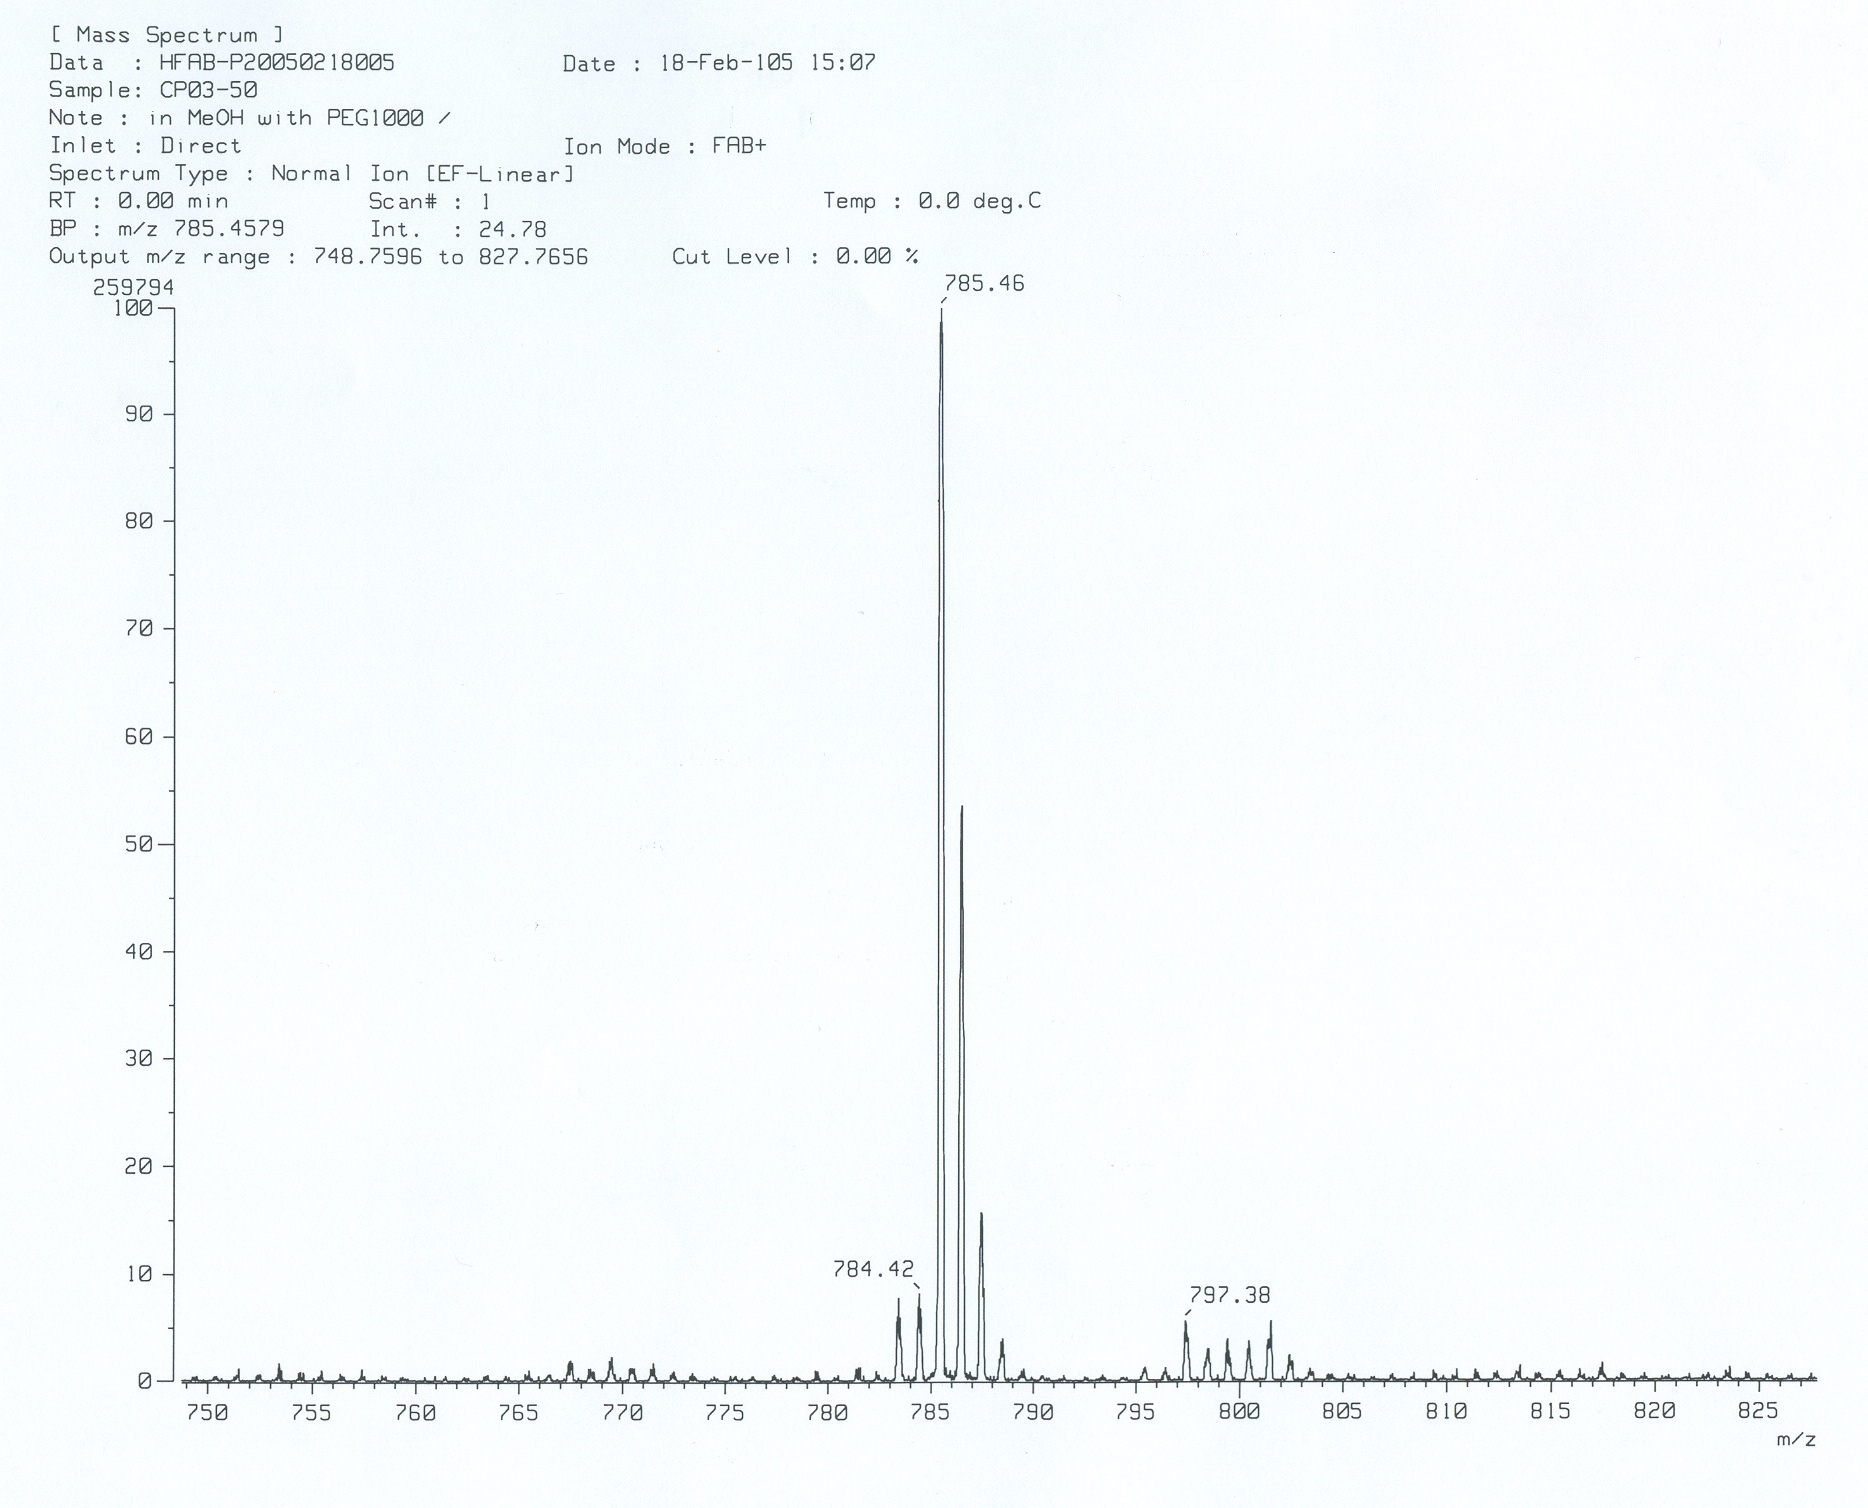

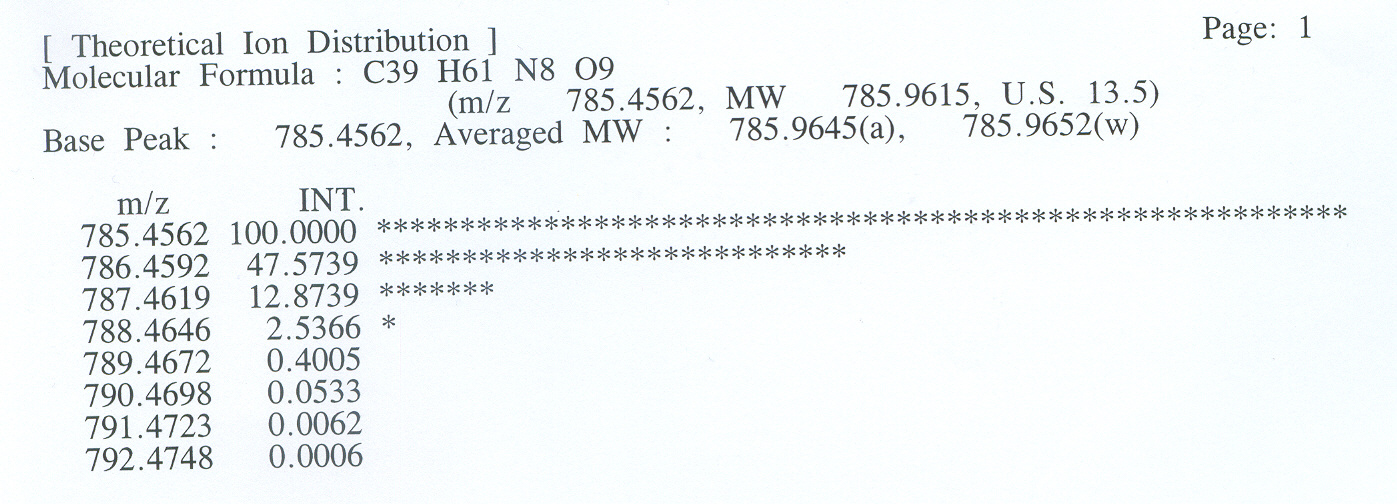

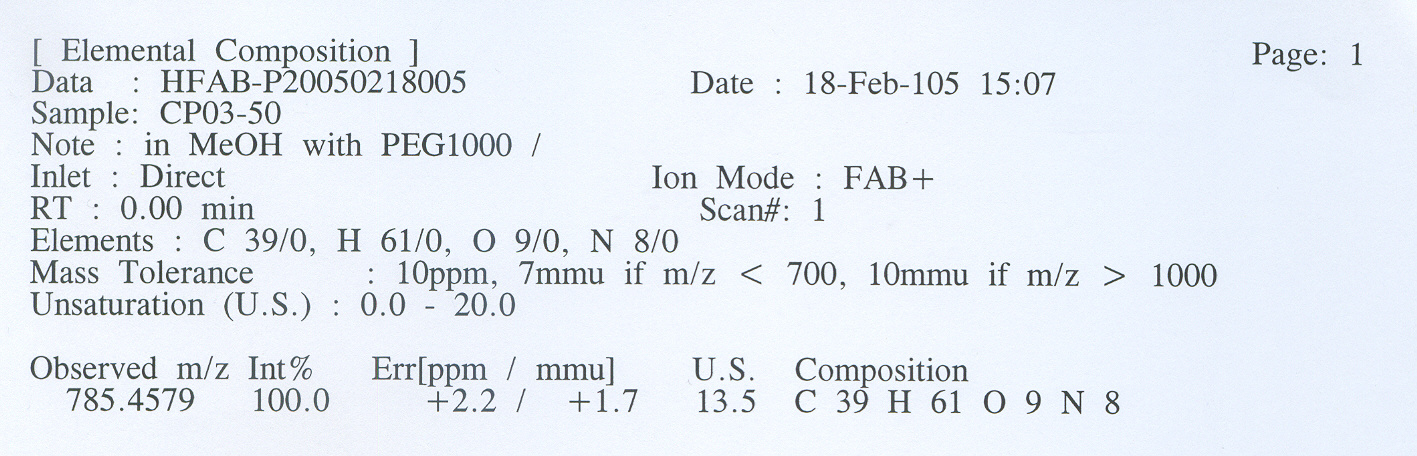


**Peptide 9 (LVVAPWT)**


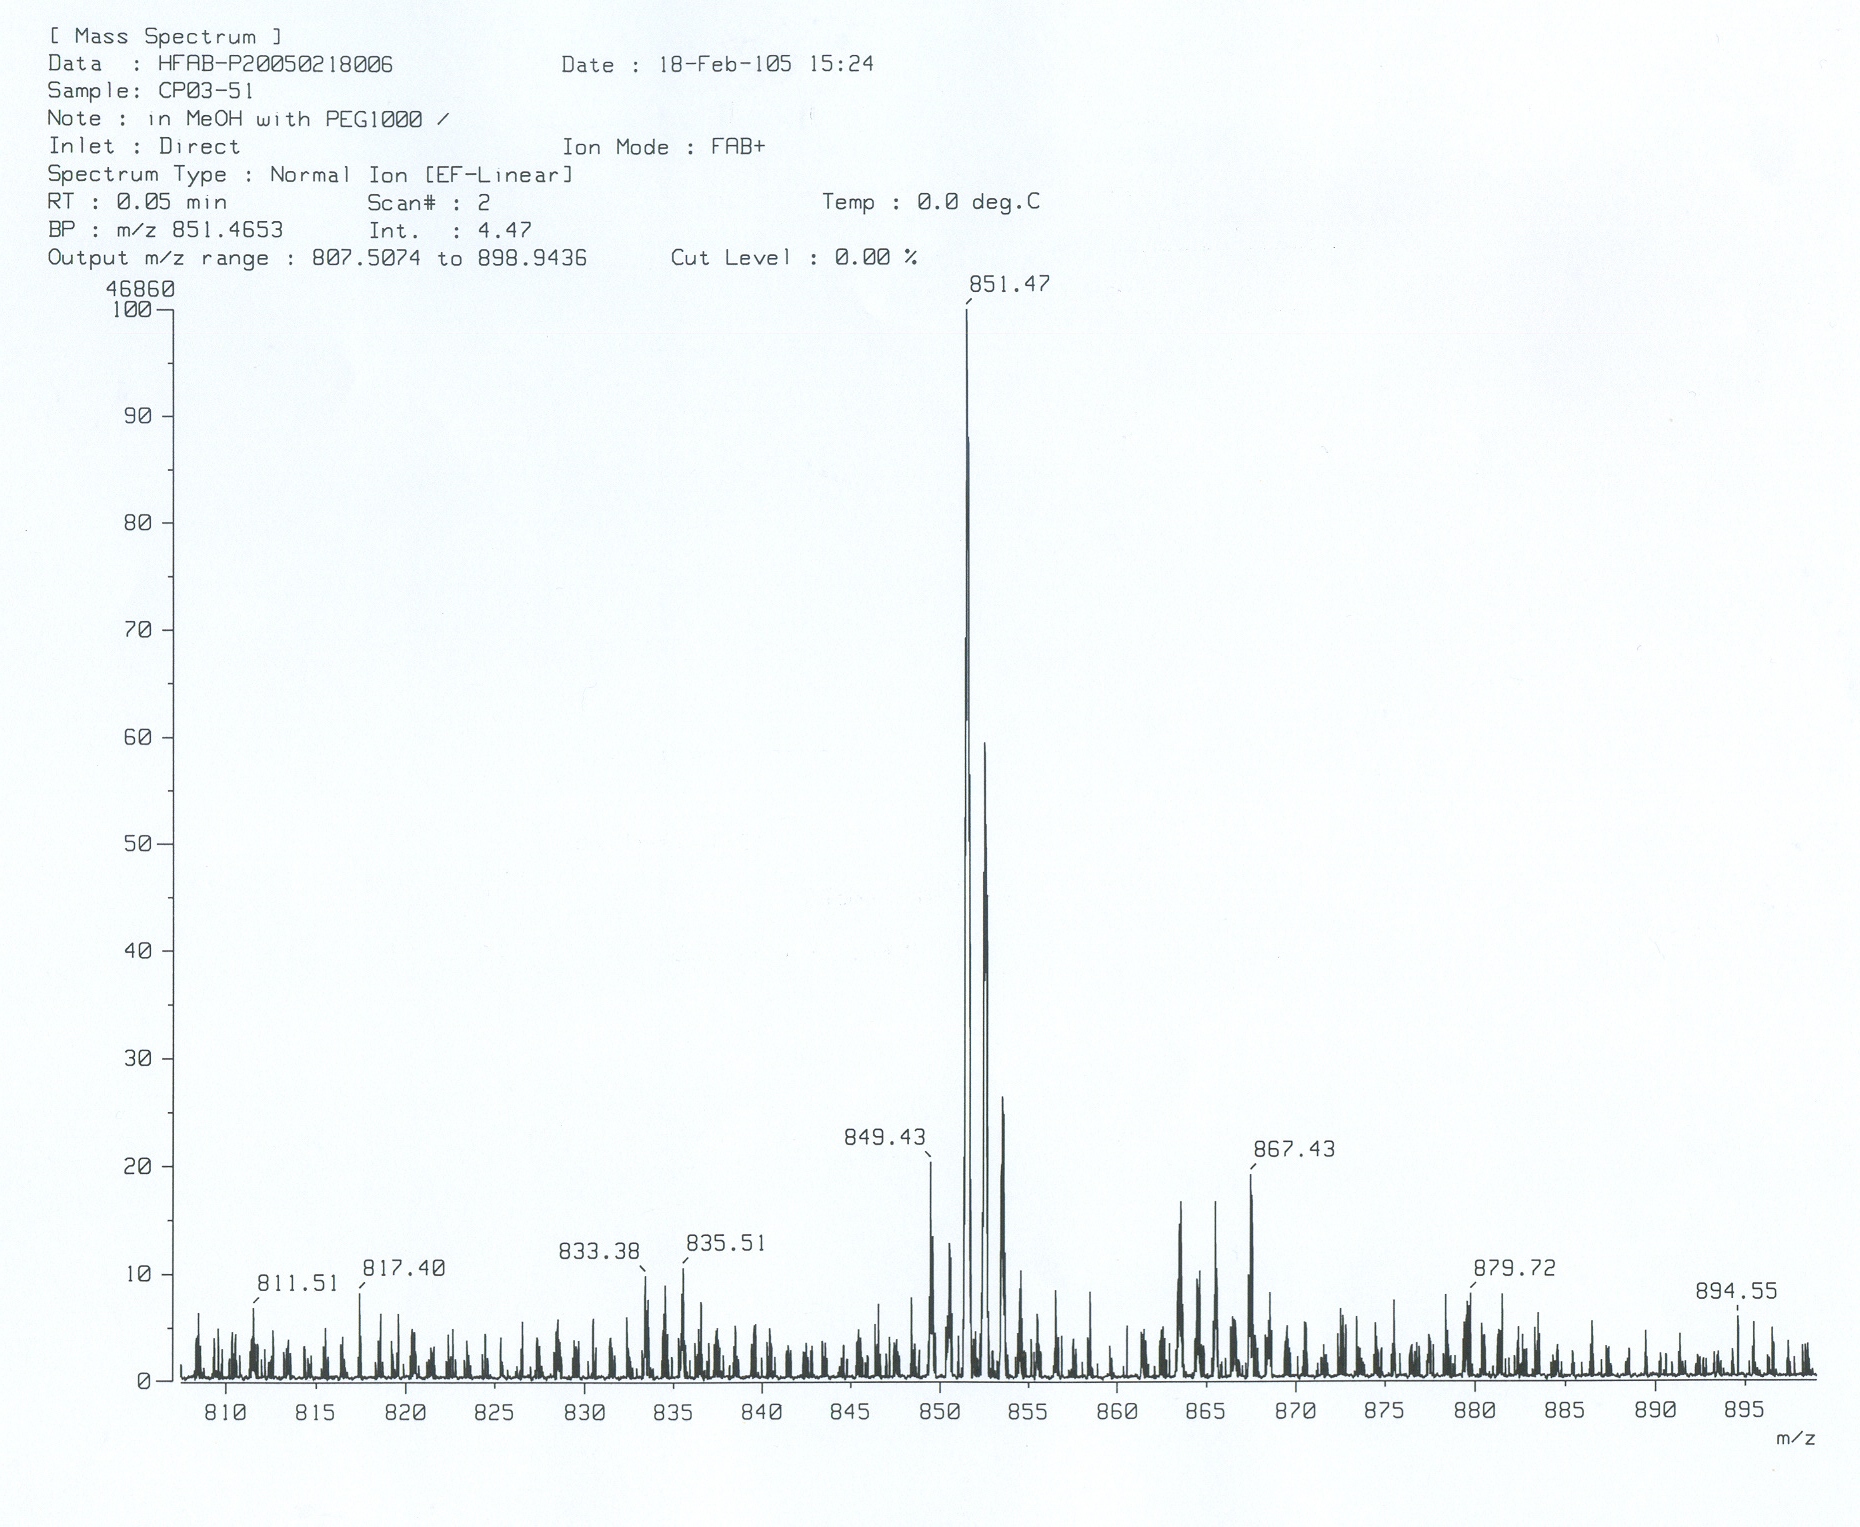

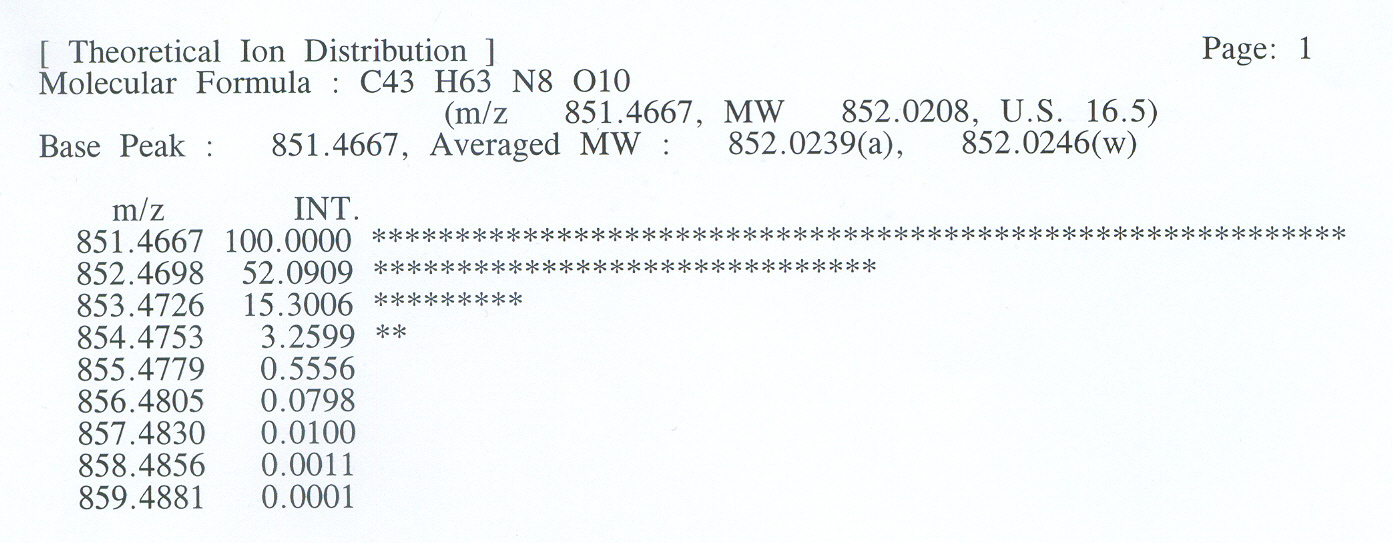

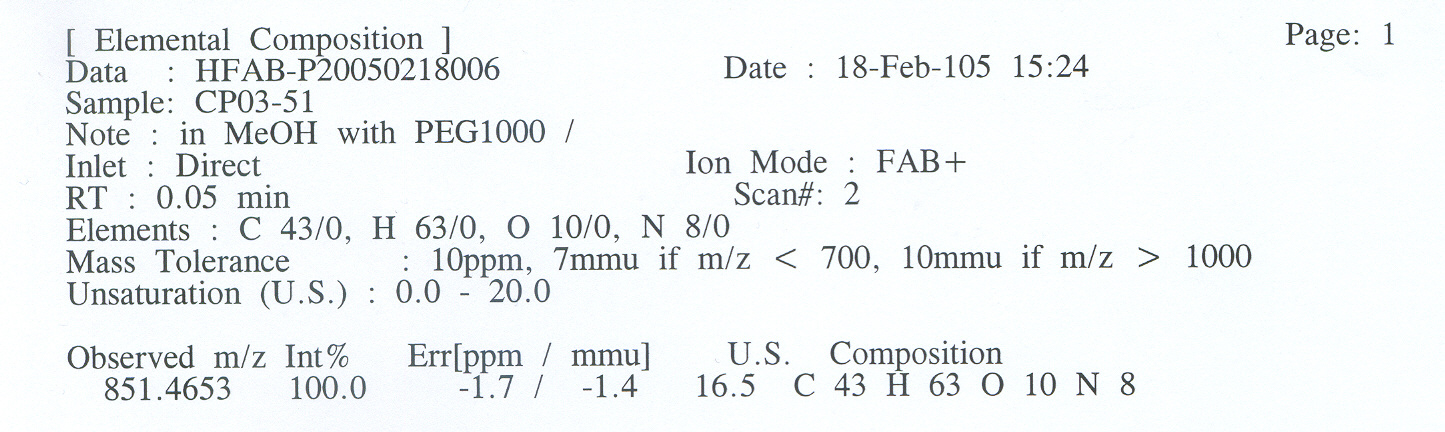


**Peptide 10 (LVVYAWT)**


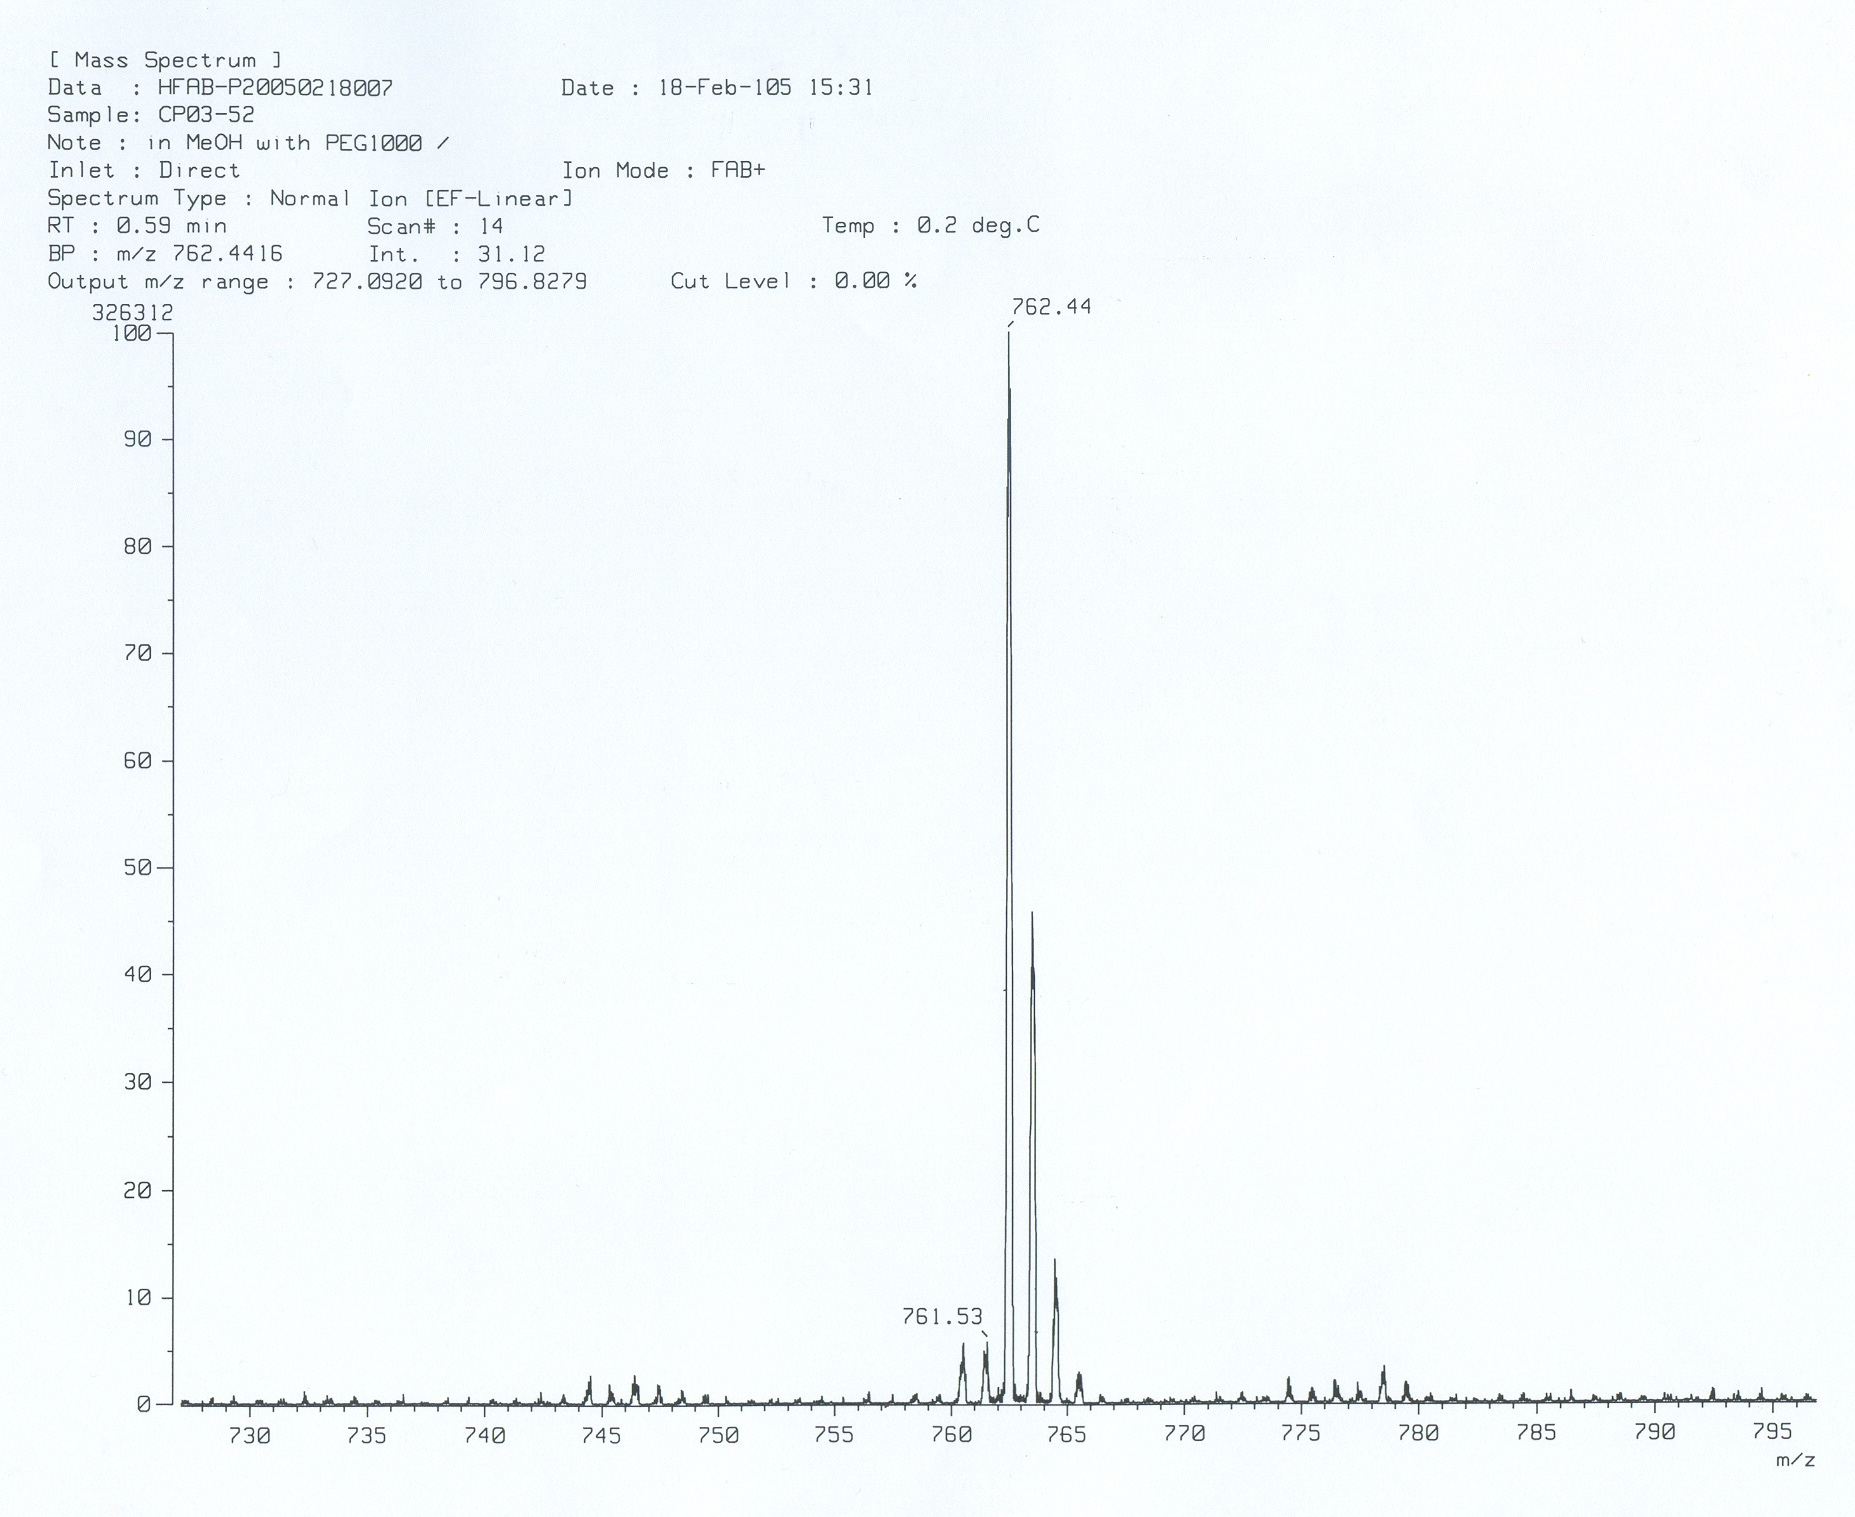

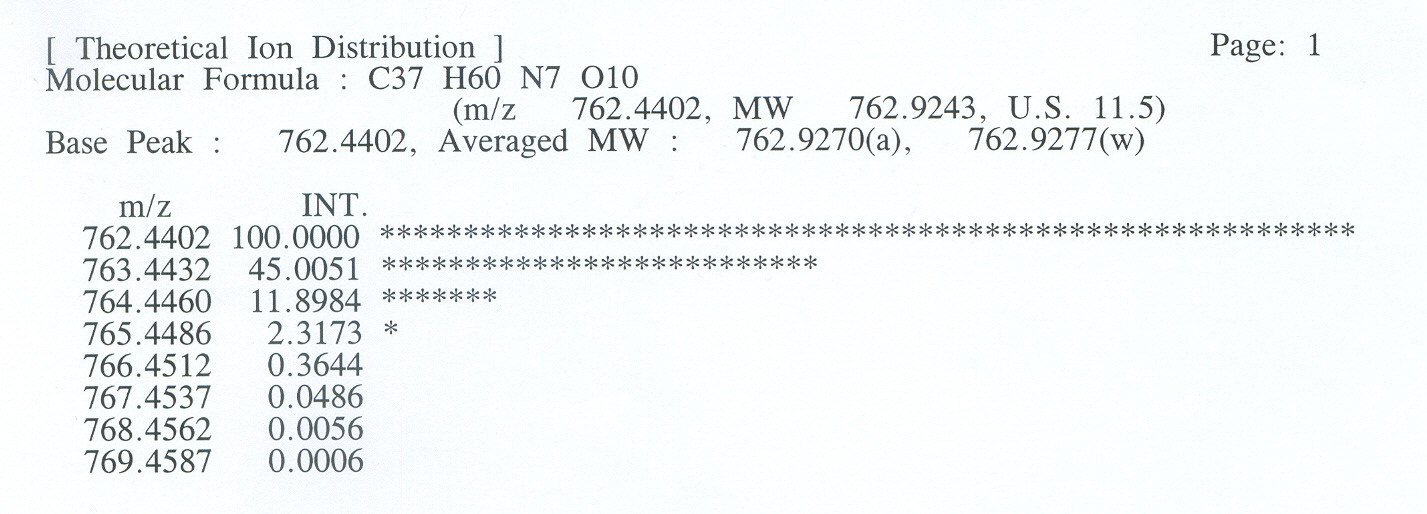

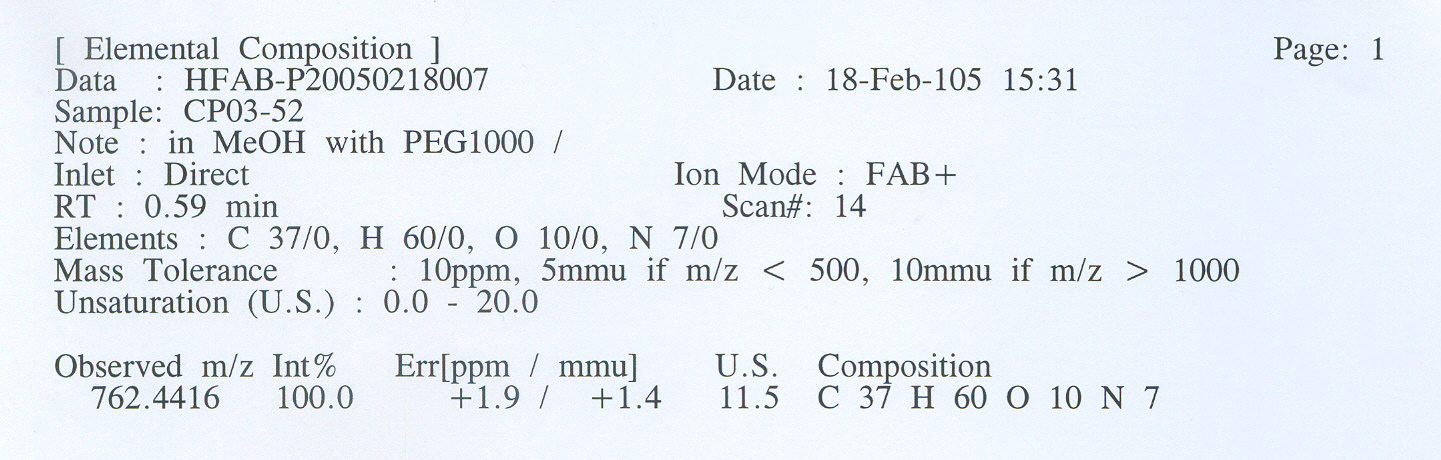


**Peptide 11 (LVVYPAT)**


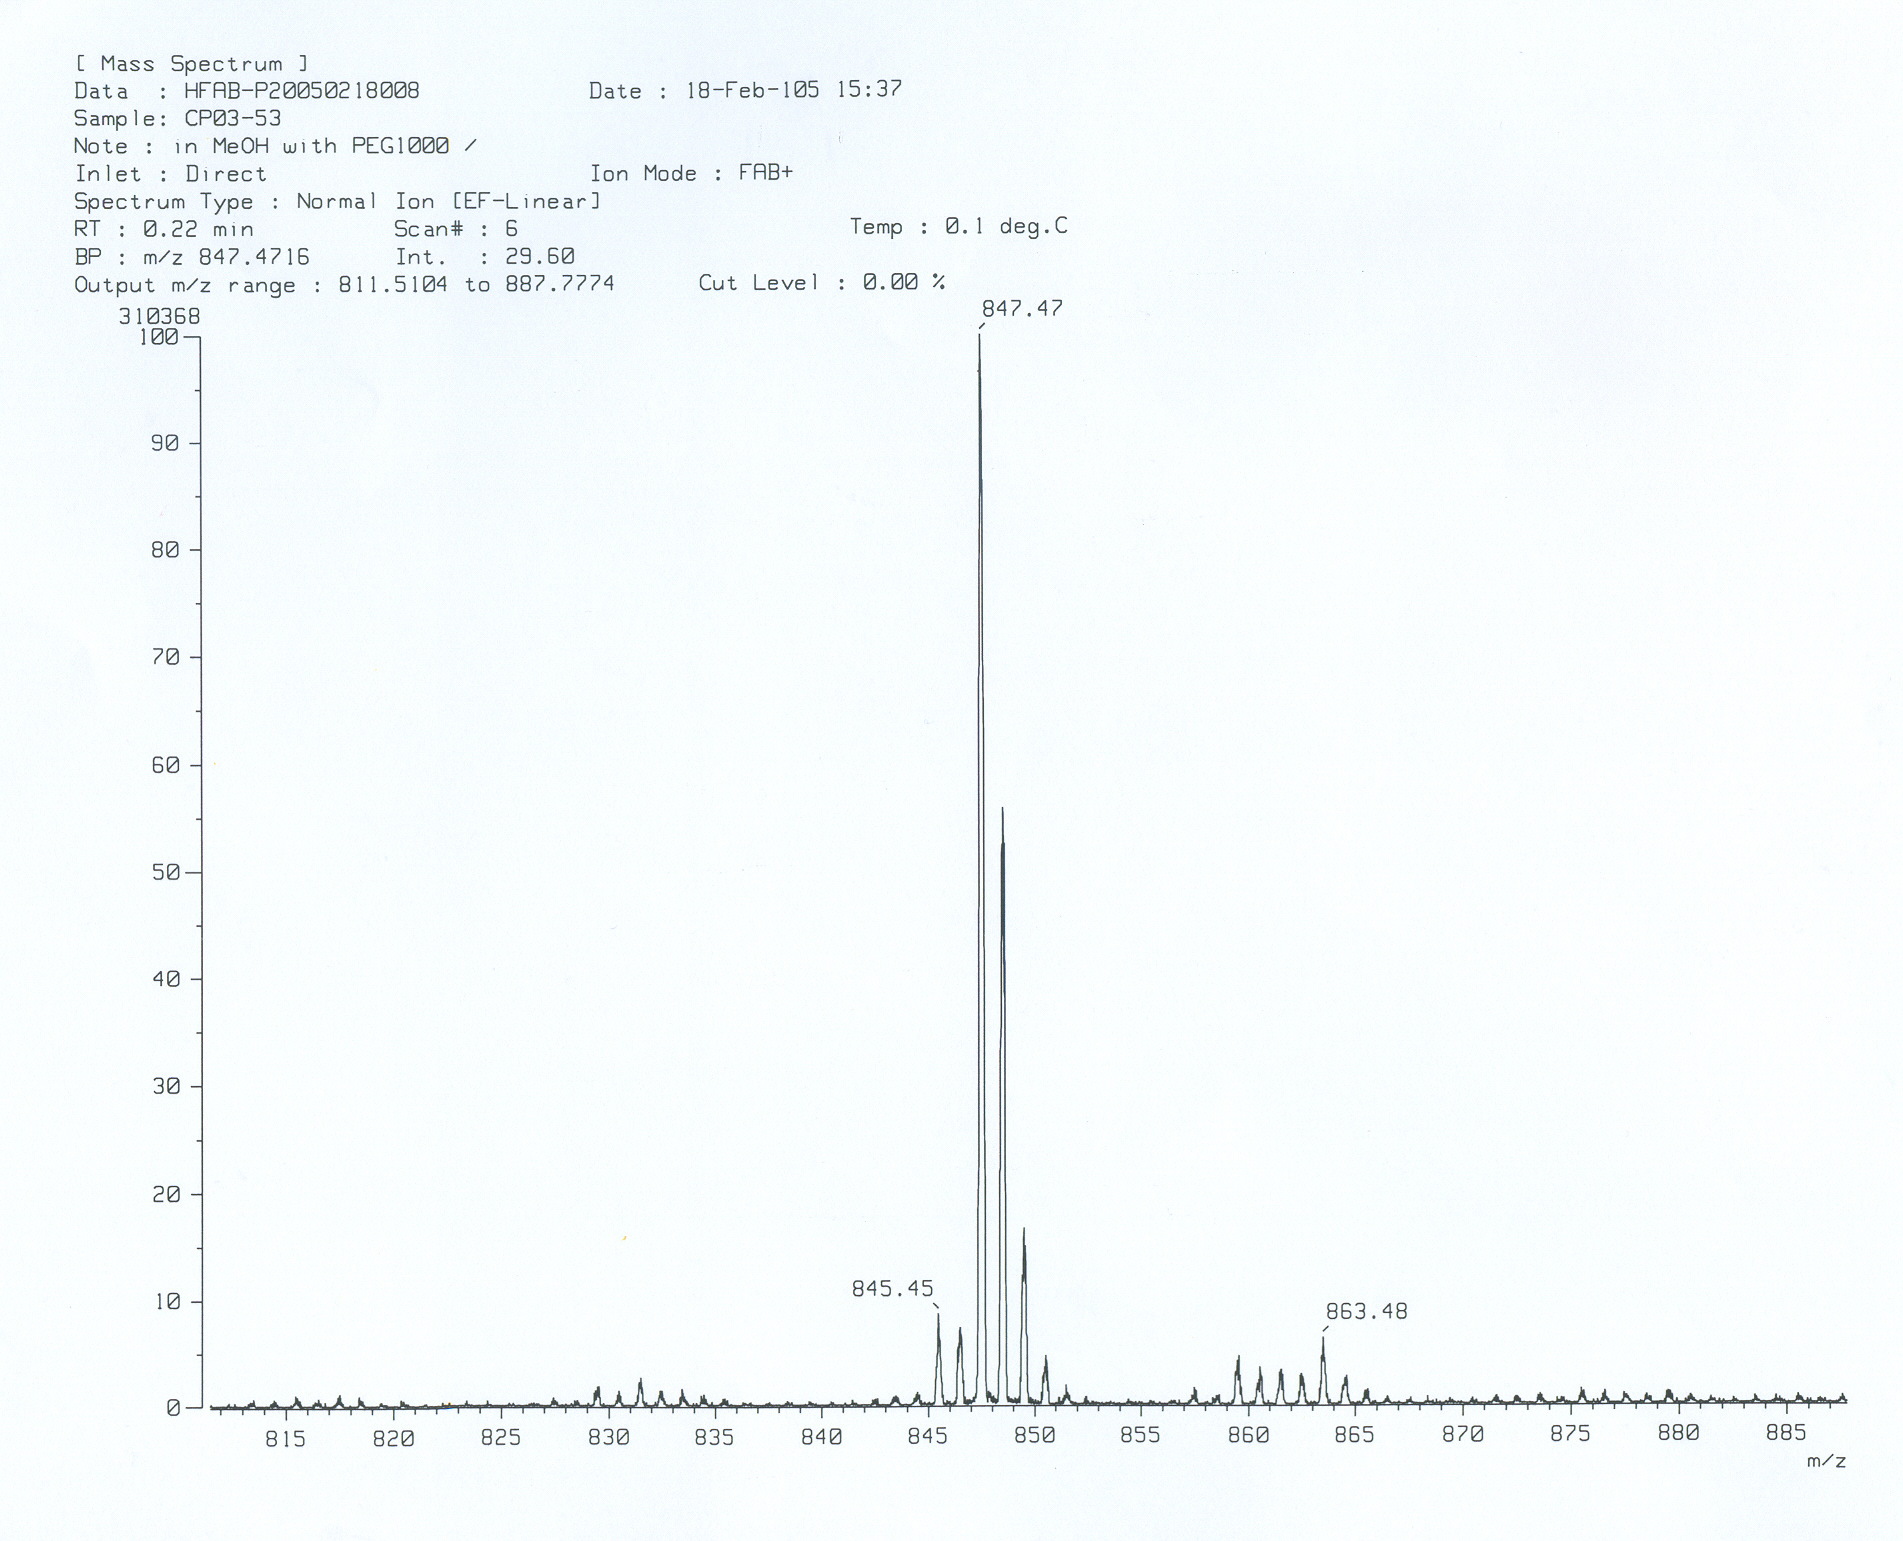

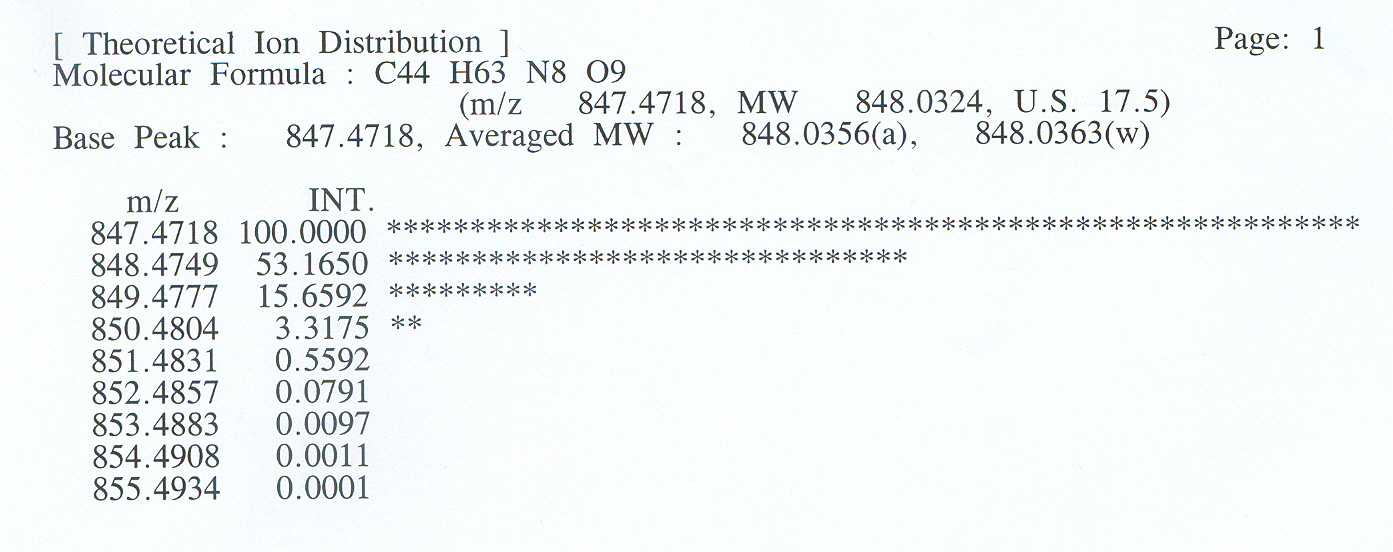

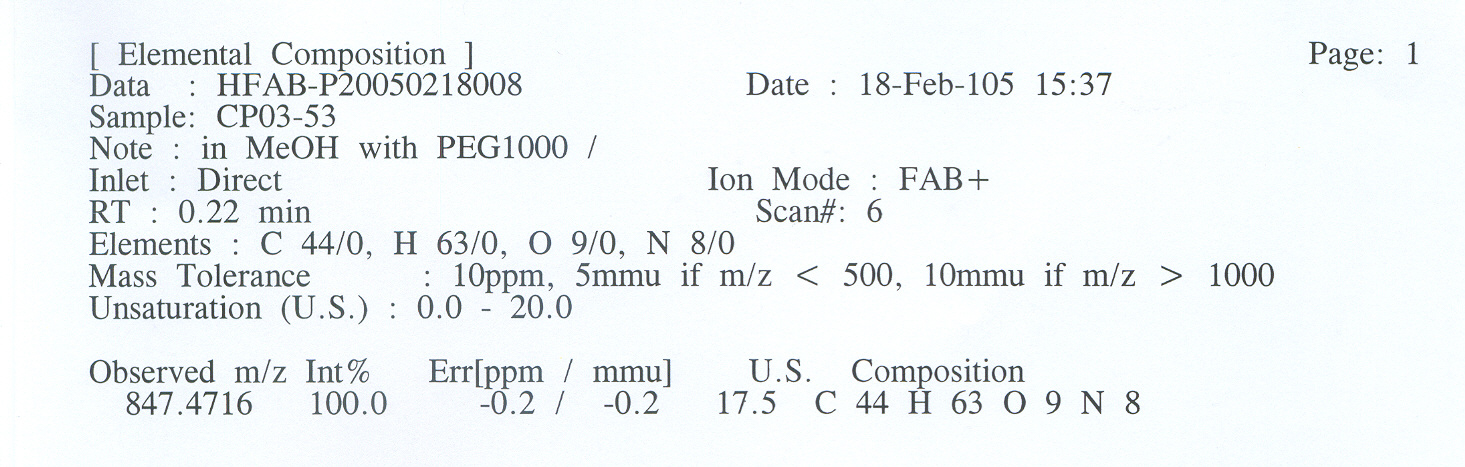


**Peptide 12 (LVVYPWA)**


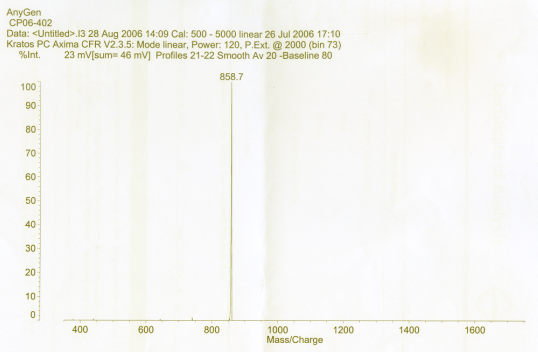


**Peptide 13 (cyclic LVVYPWT)**


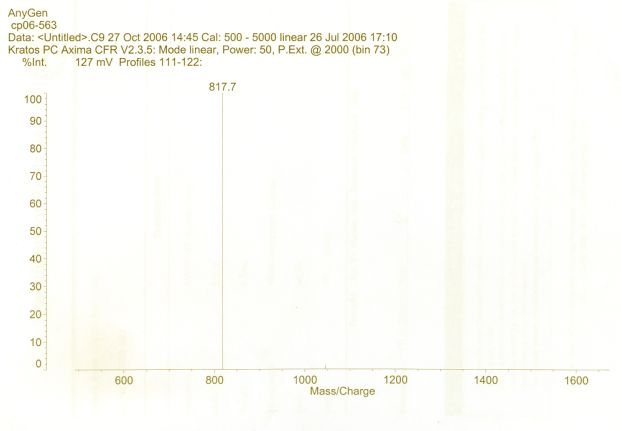


**Peptide 14 (cyclic AVVYPWT)**


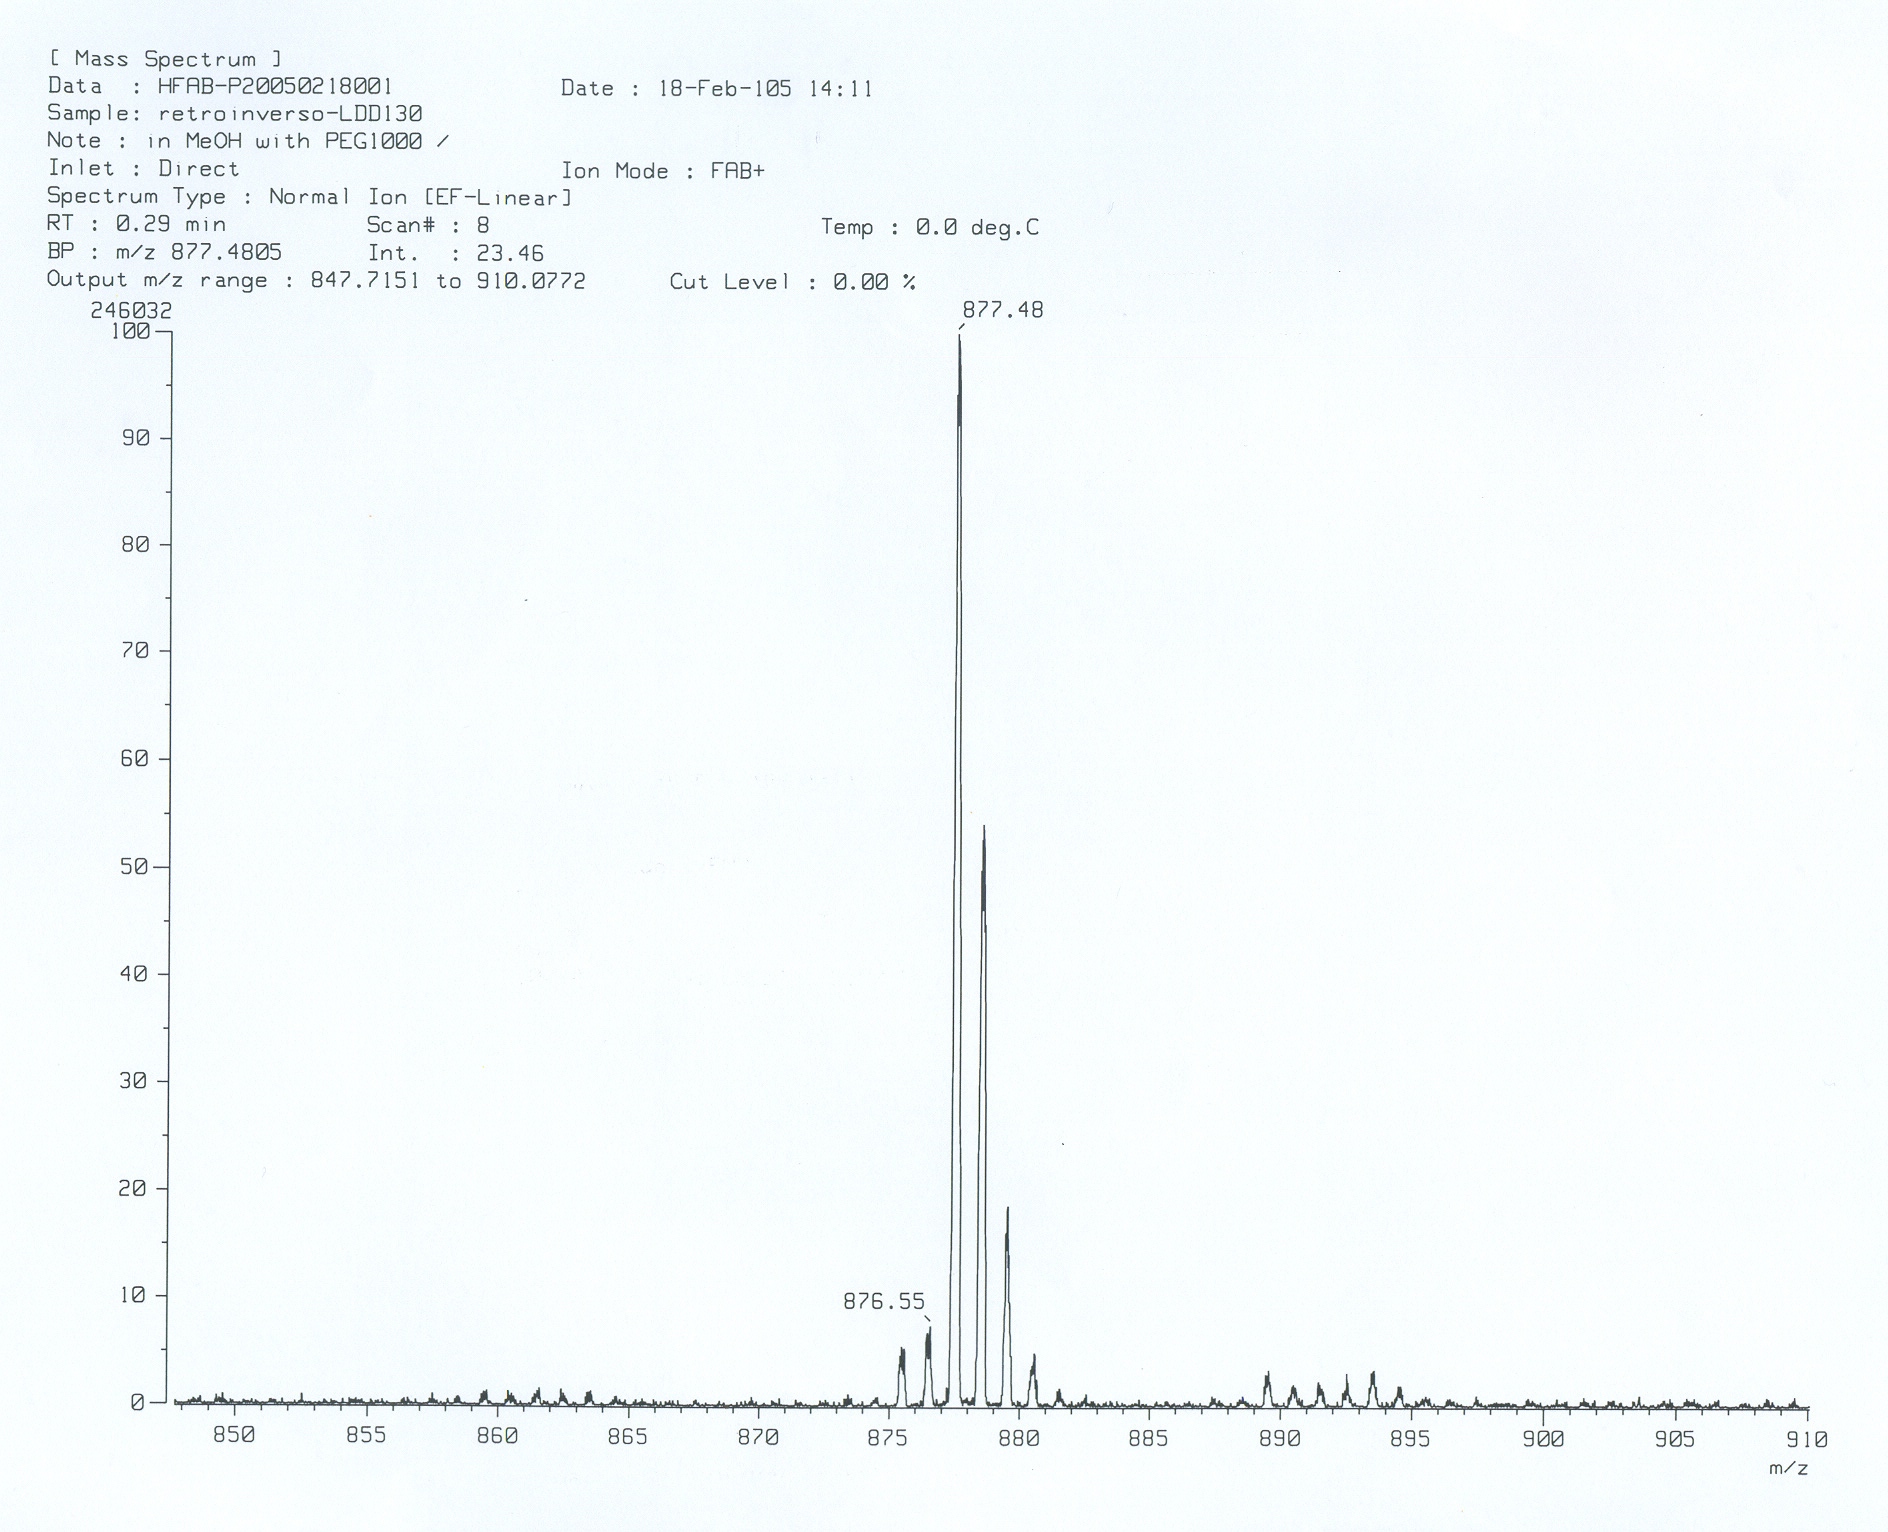

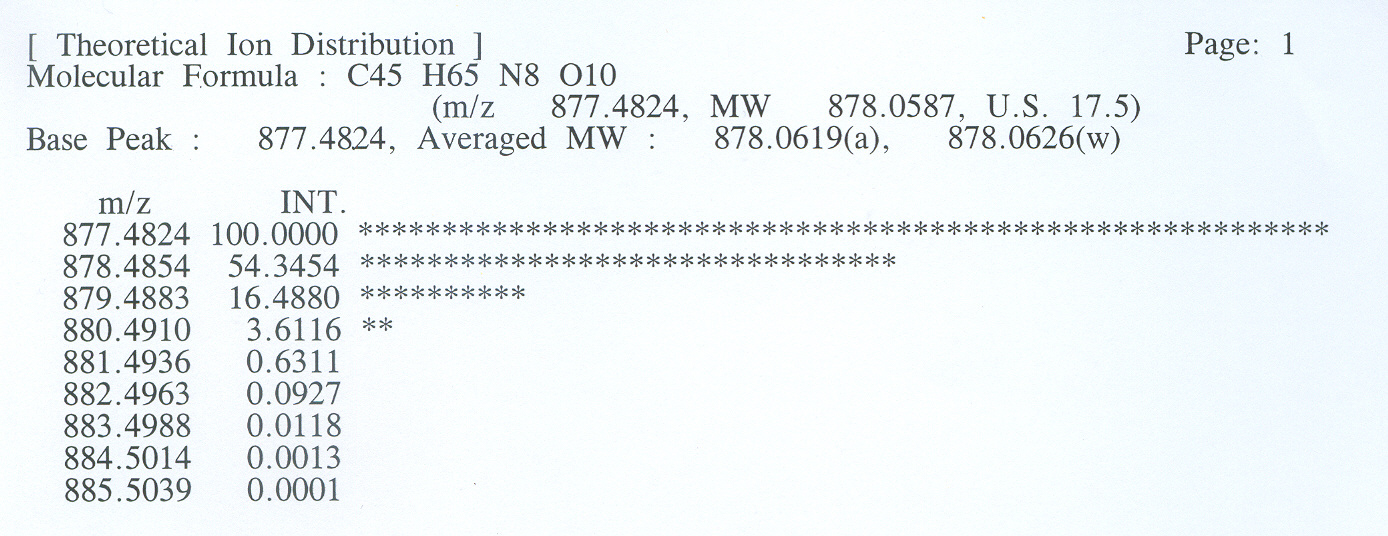

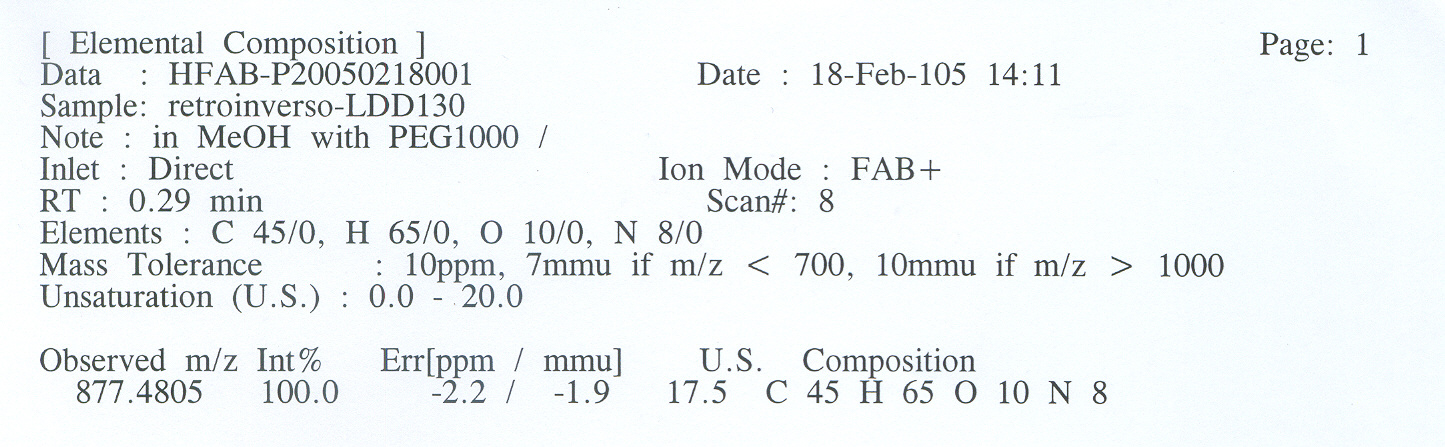


**Peptide 15 (D)-TWPYVVL**

**HPLC chromatograms of peptide derivatives**


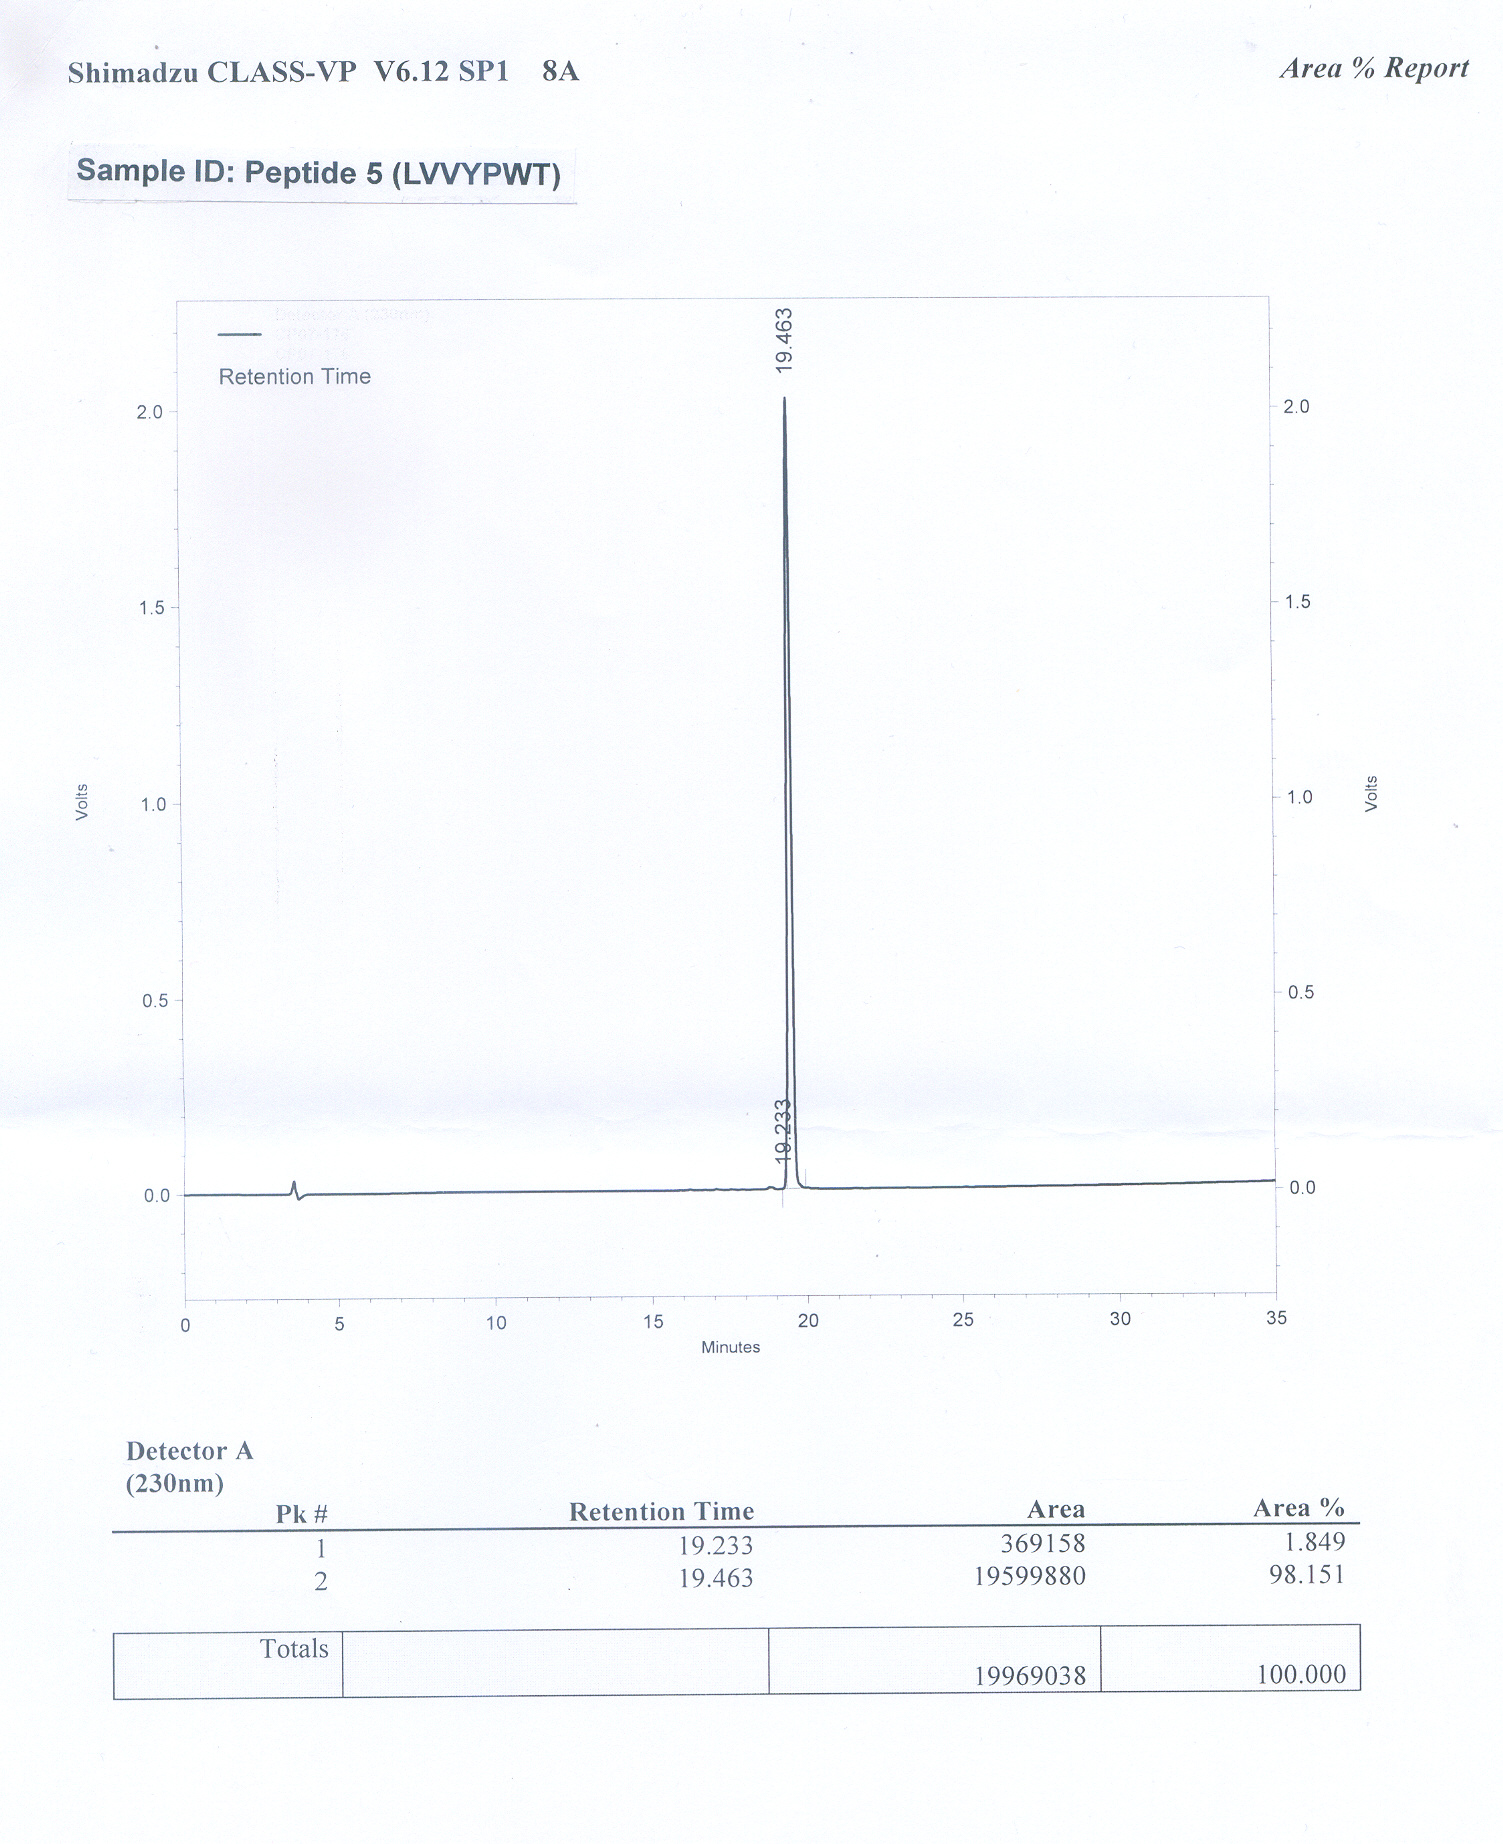


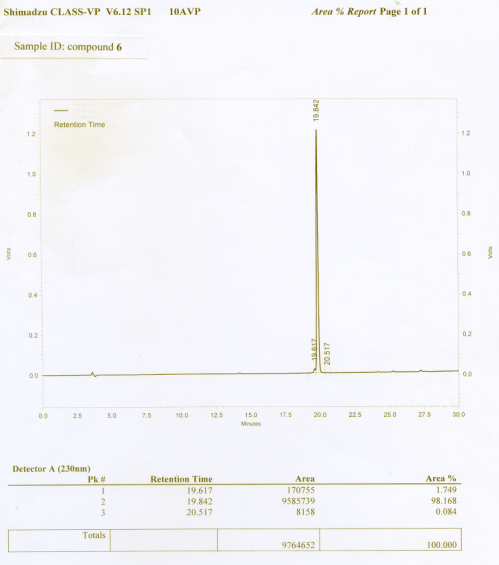


**Sample ID: Peptide 6 (AVVYPWT)**


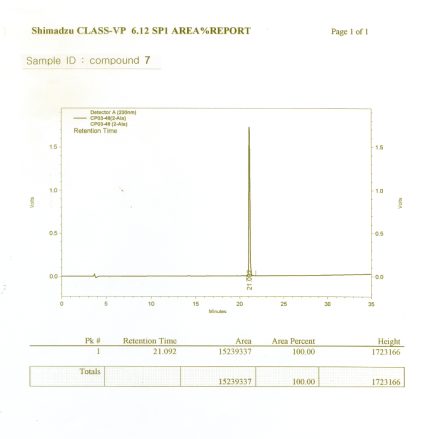


**Sample ID: Peptide 7 (LAVYPWT)**


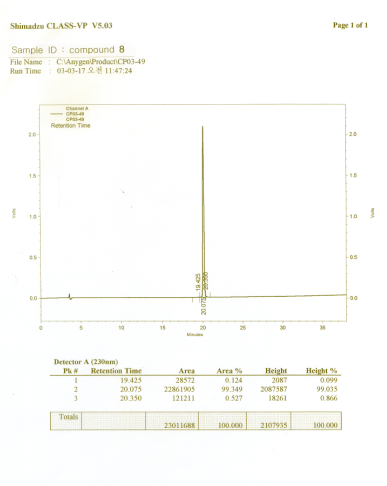


**Sample ID: Peptide 8 (LVAYPWT)**


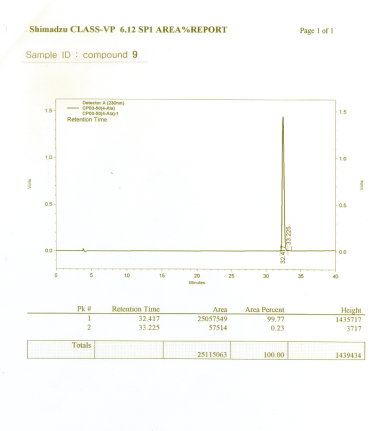


**Sample ID: Peptide 9 (LVVAPWT)**


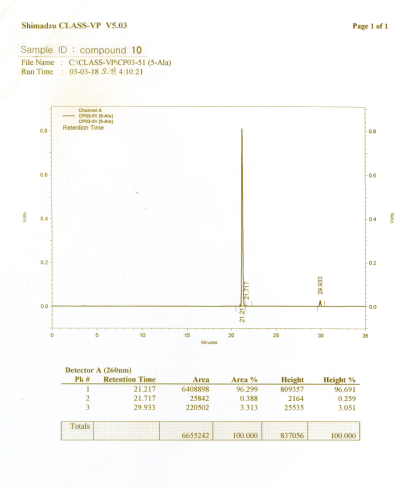


**Sample ID: Peptide 10 (LVVYAWT)**


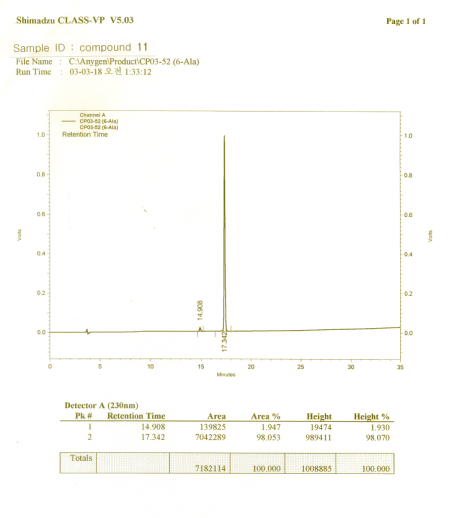


**Sample ID: Peptide 11 (LVVYPAT)**


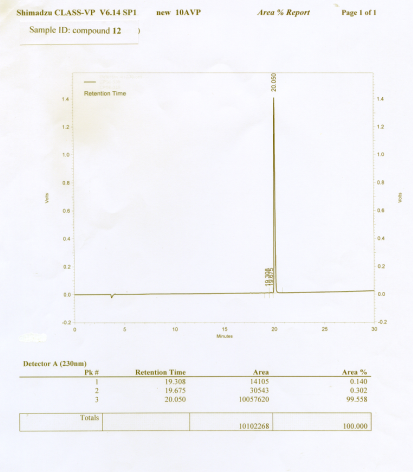


**Sample ID: Peptide 12 (LVVYPWA)**


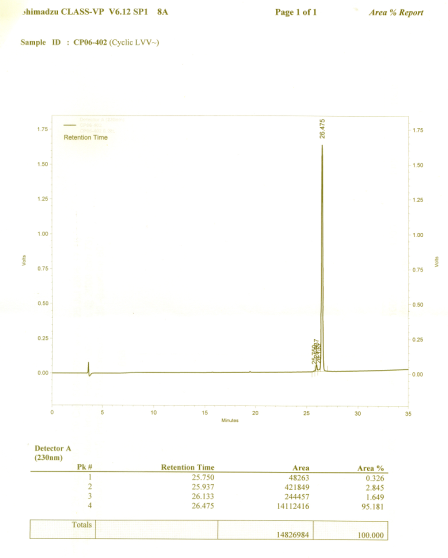


**Sample ID: Peptide 13 (cyclic LVVYPWT)**


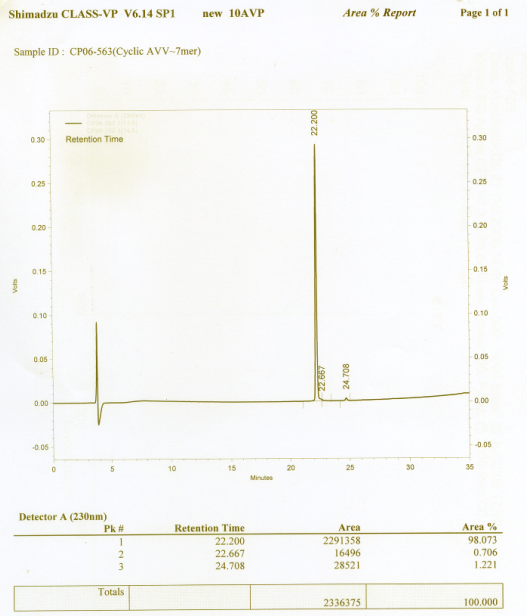


**Sample ID: Peptide 14 (cyclic AVVYPWT)**


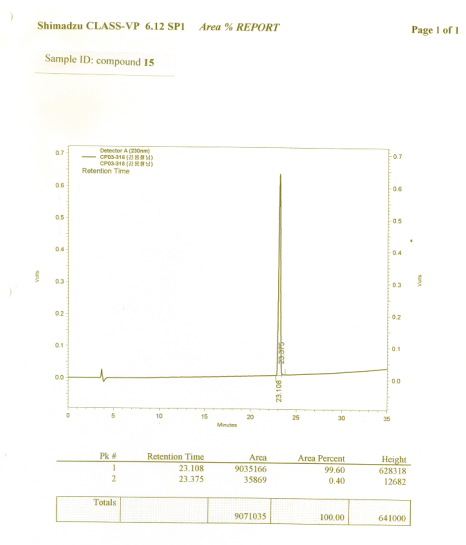


**Sample ID: Peptide 15 (D)-TWPYVVL**


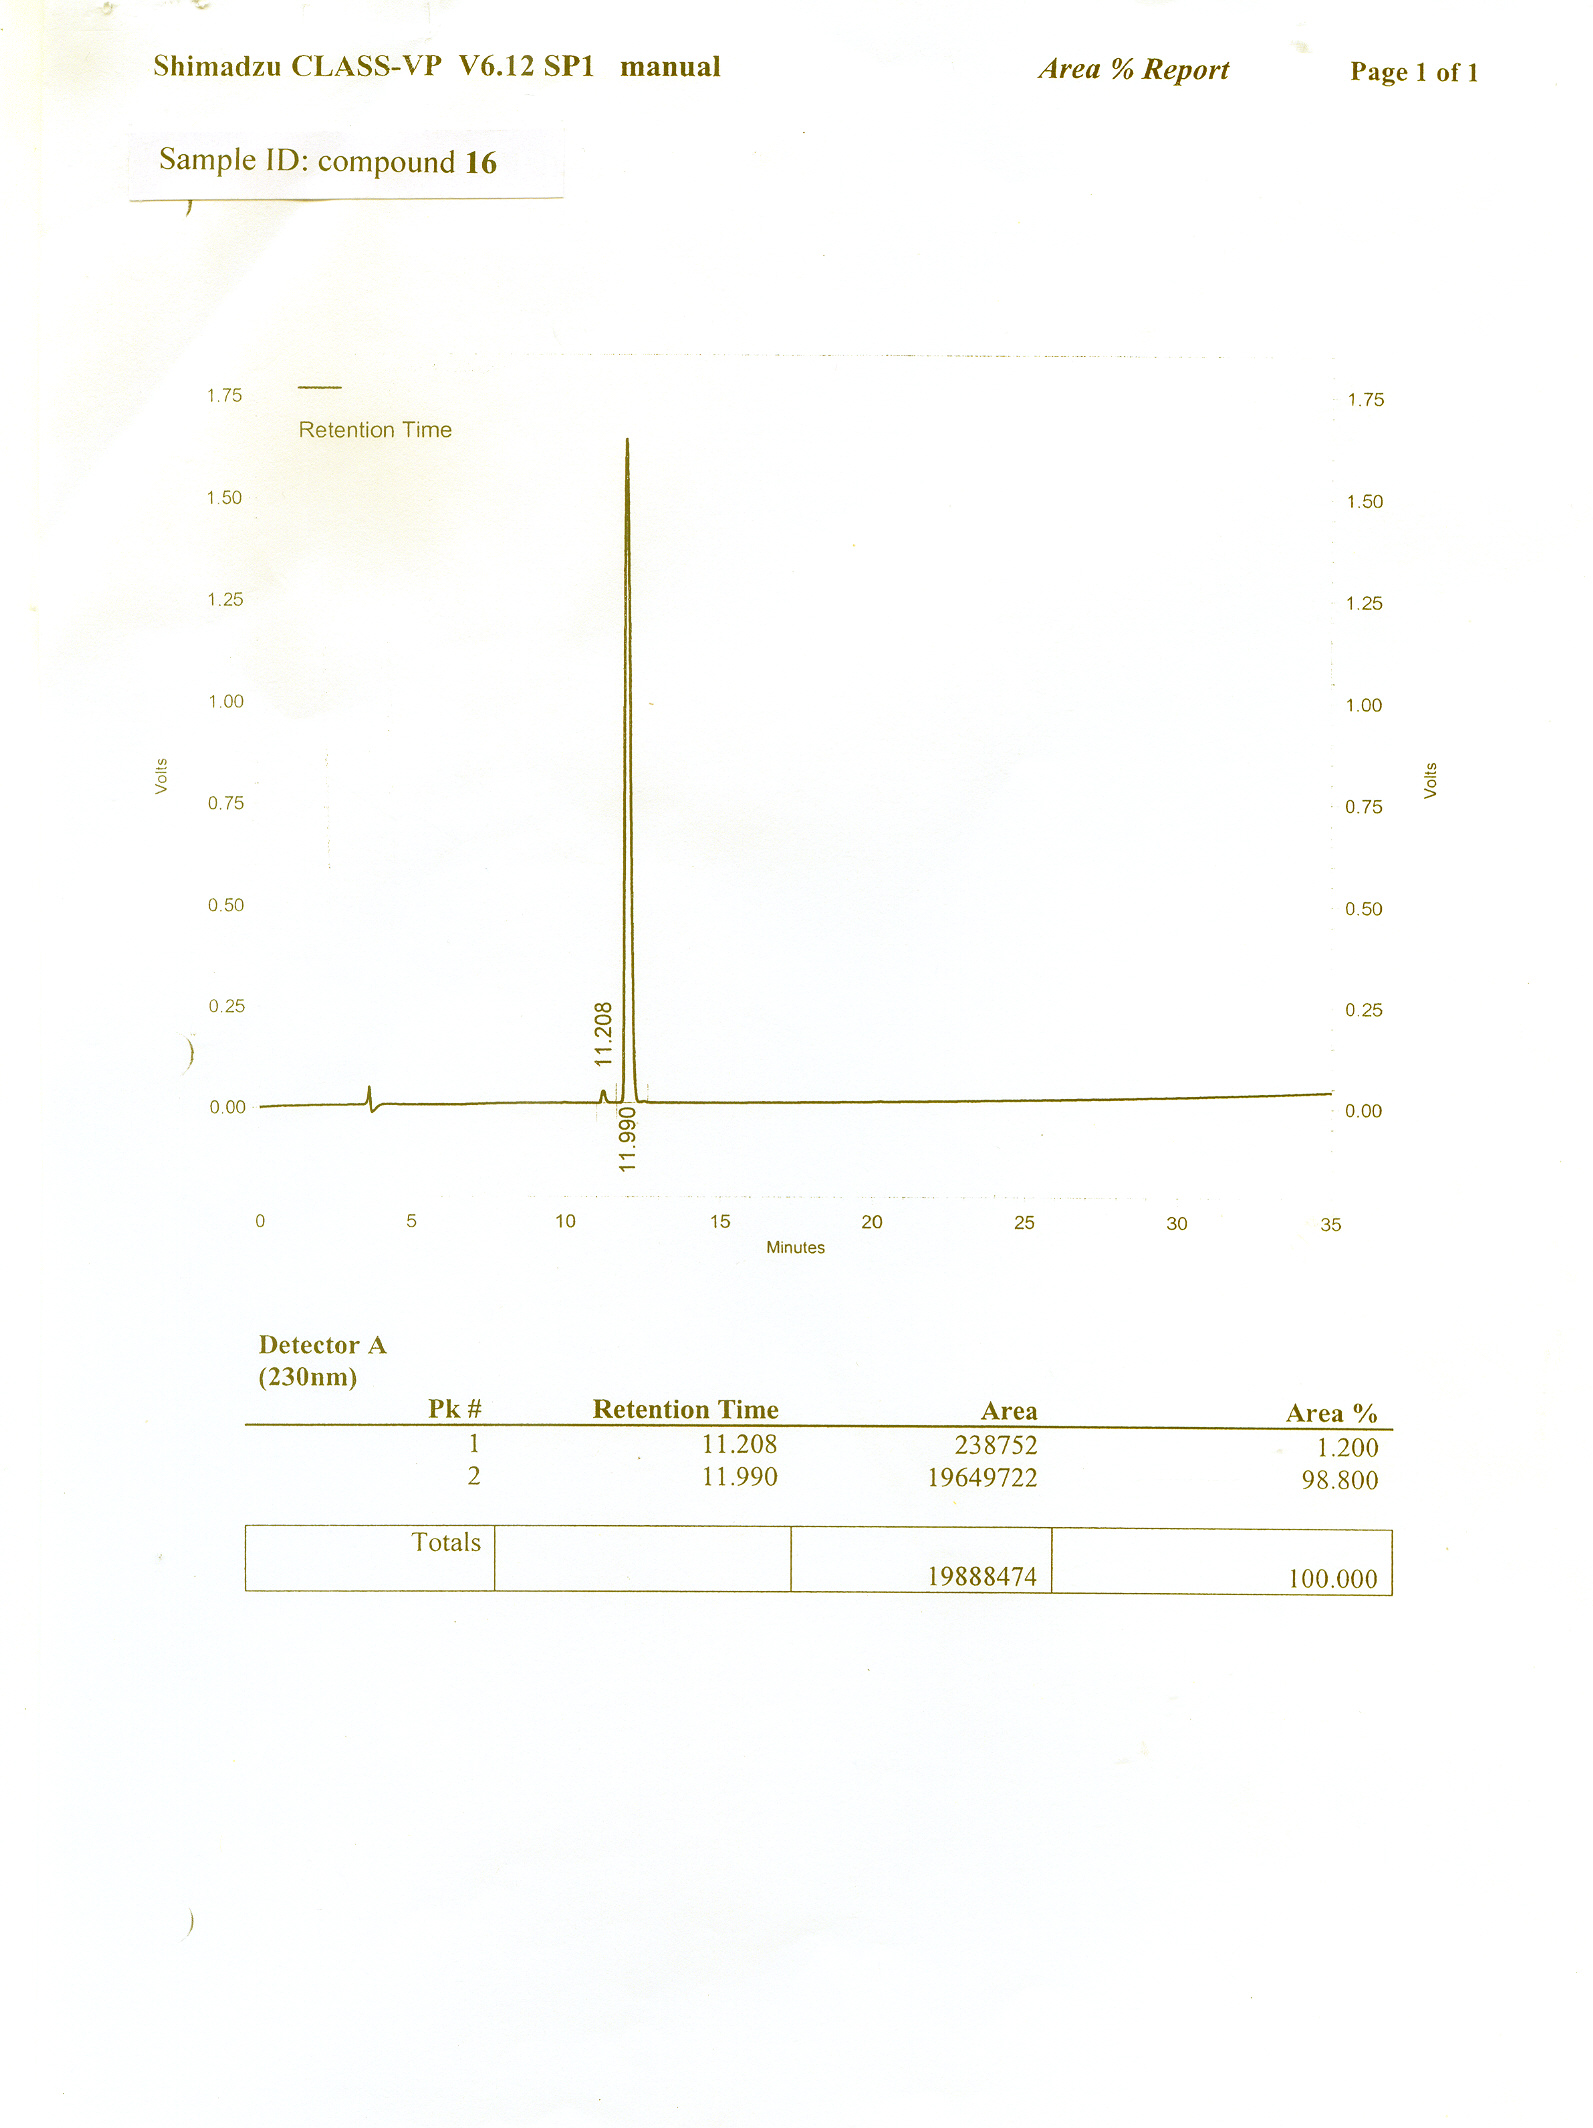


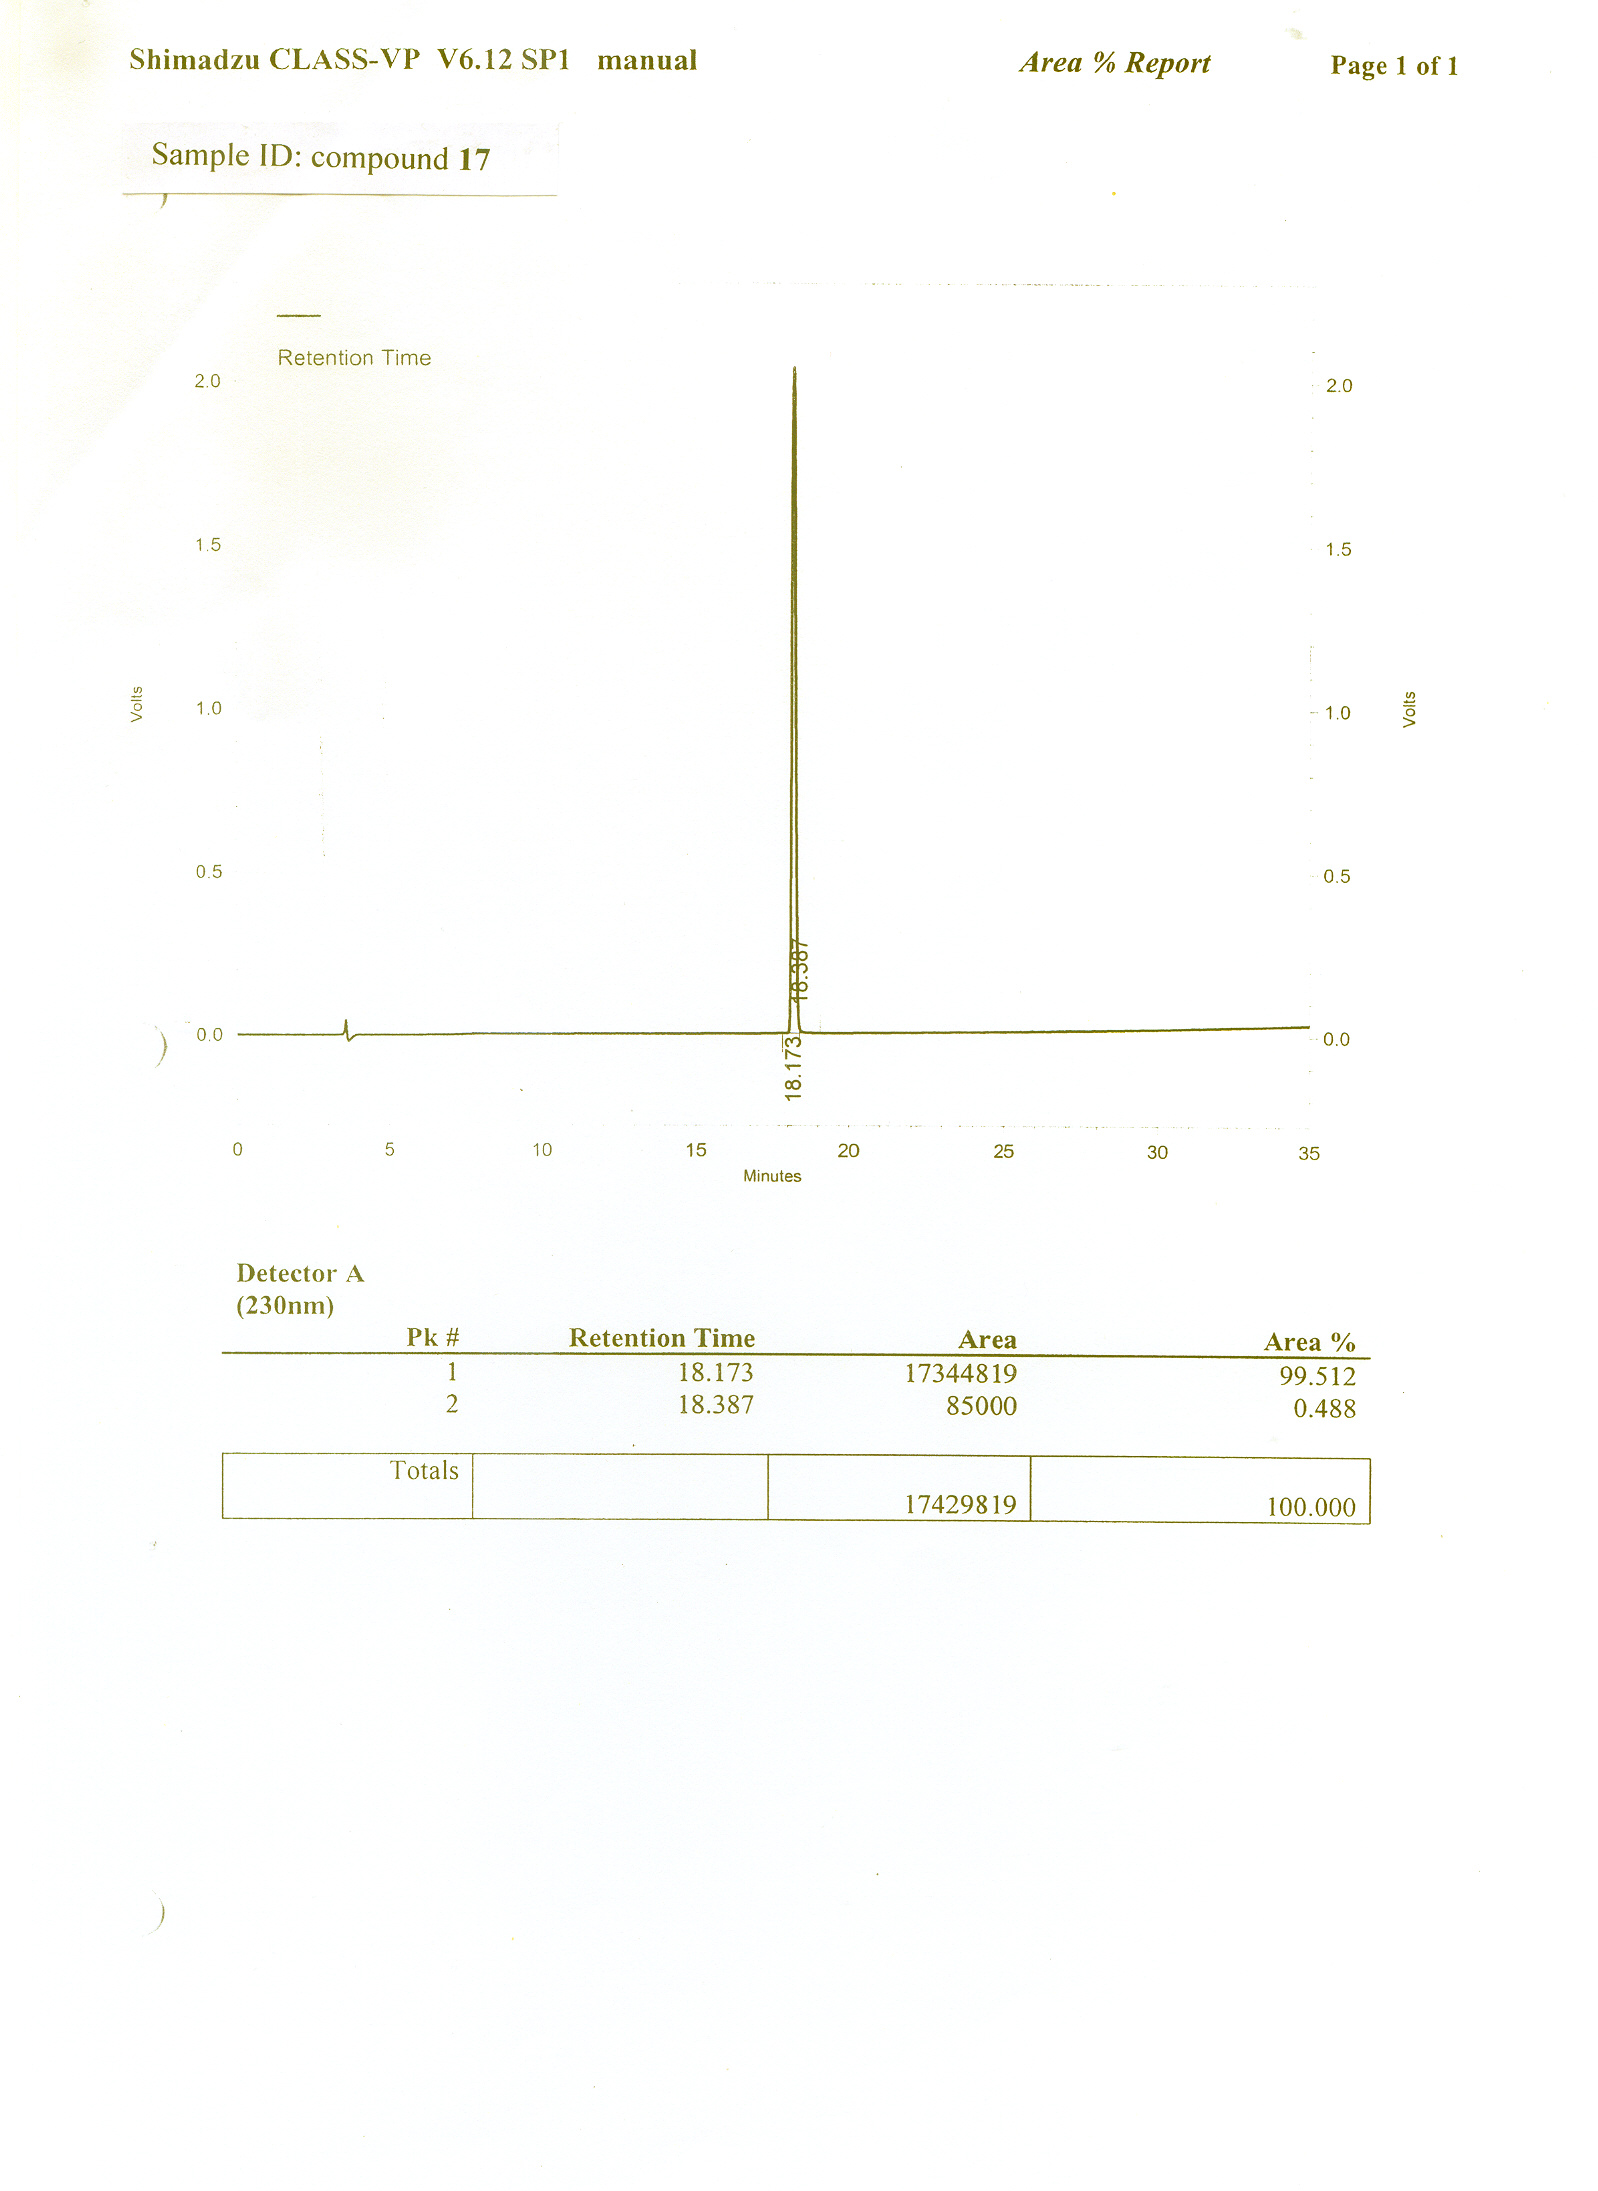


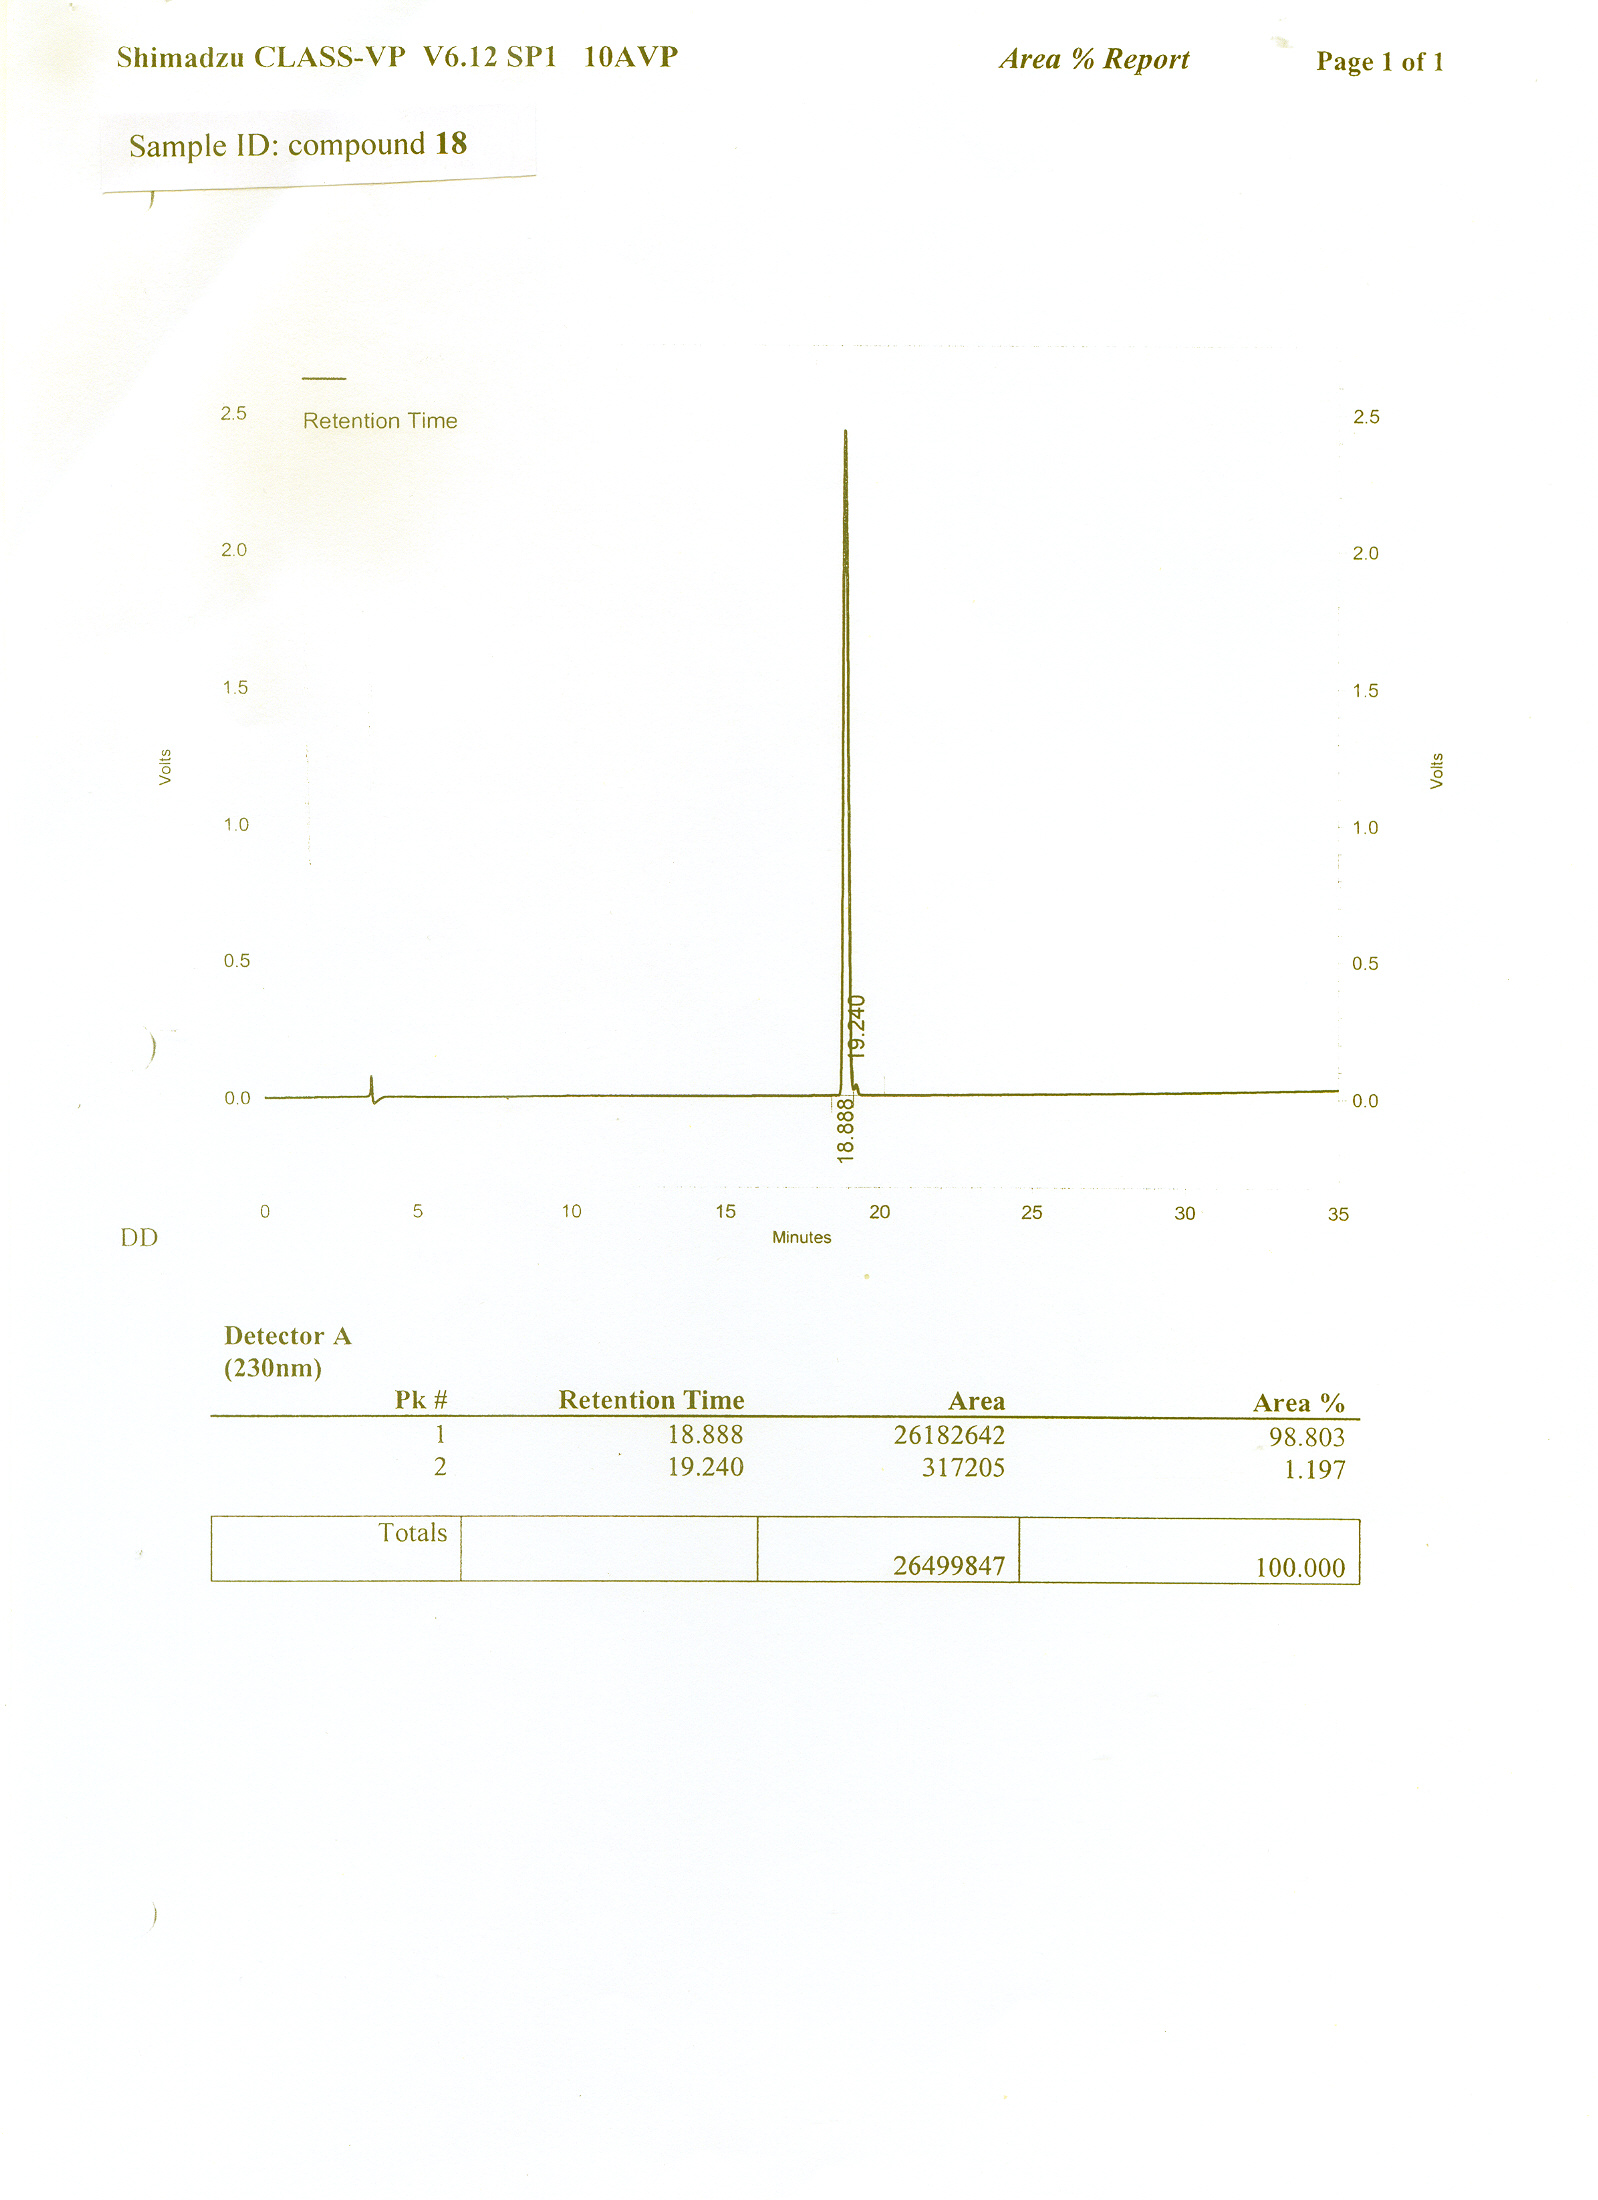


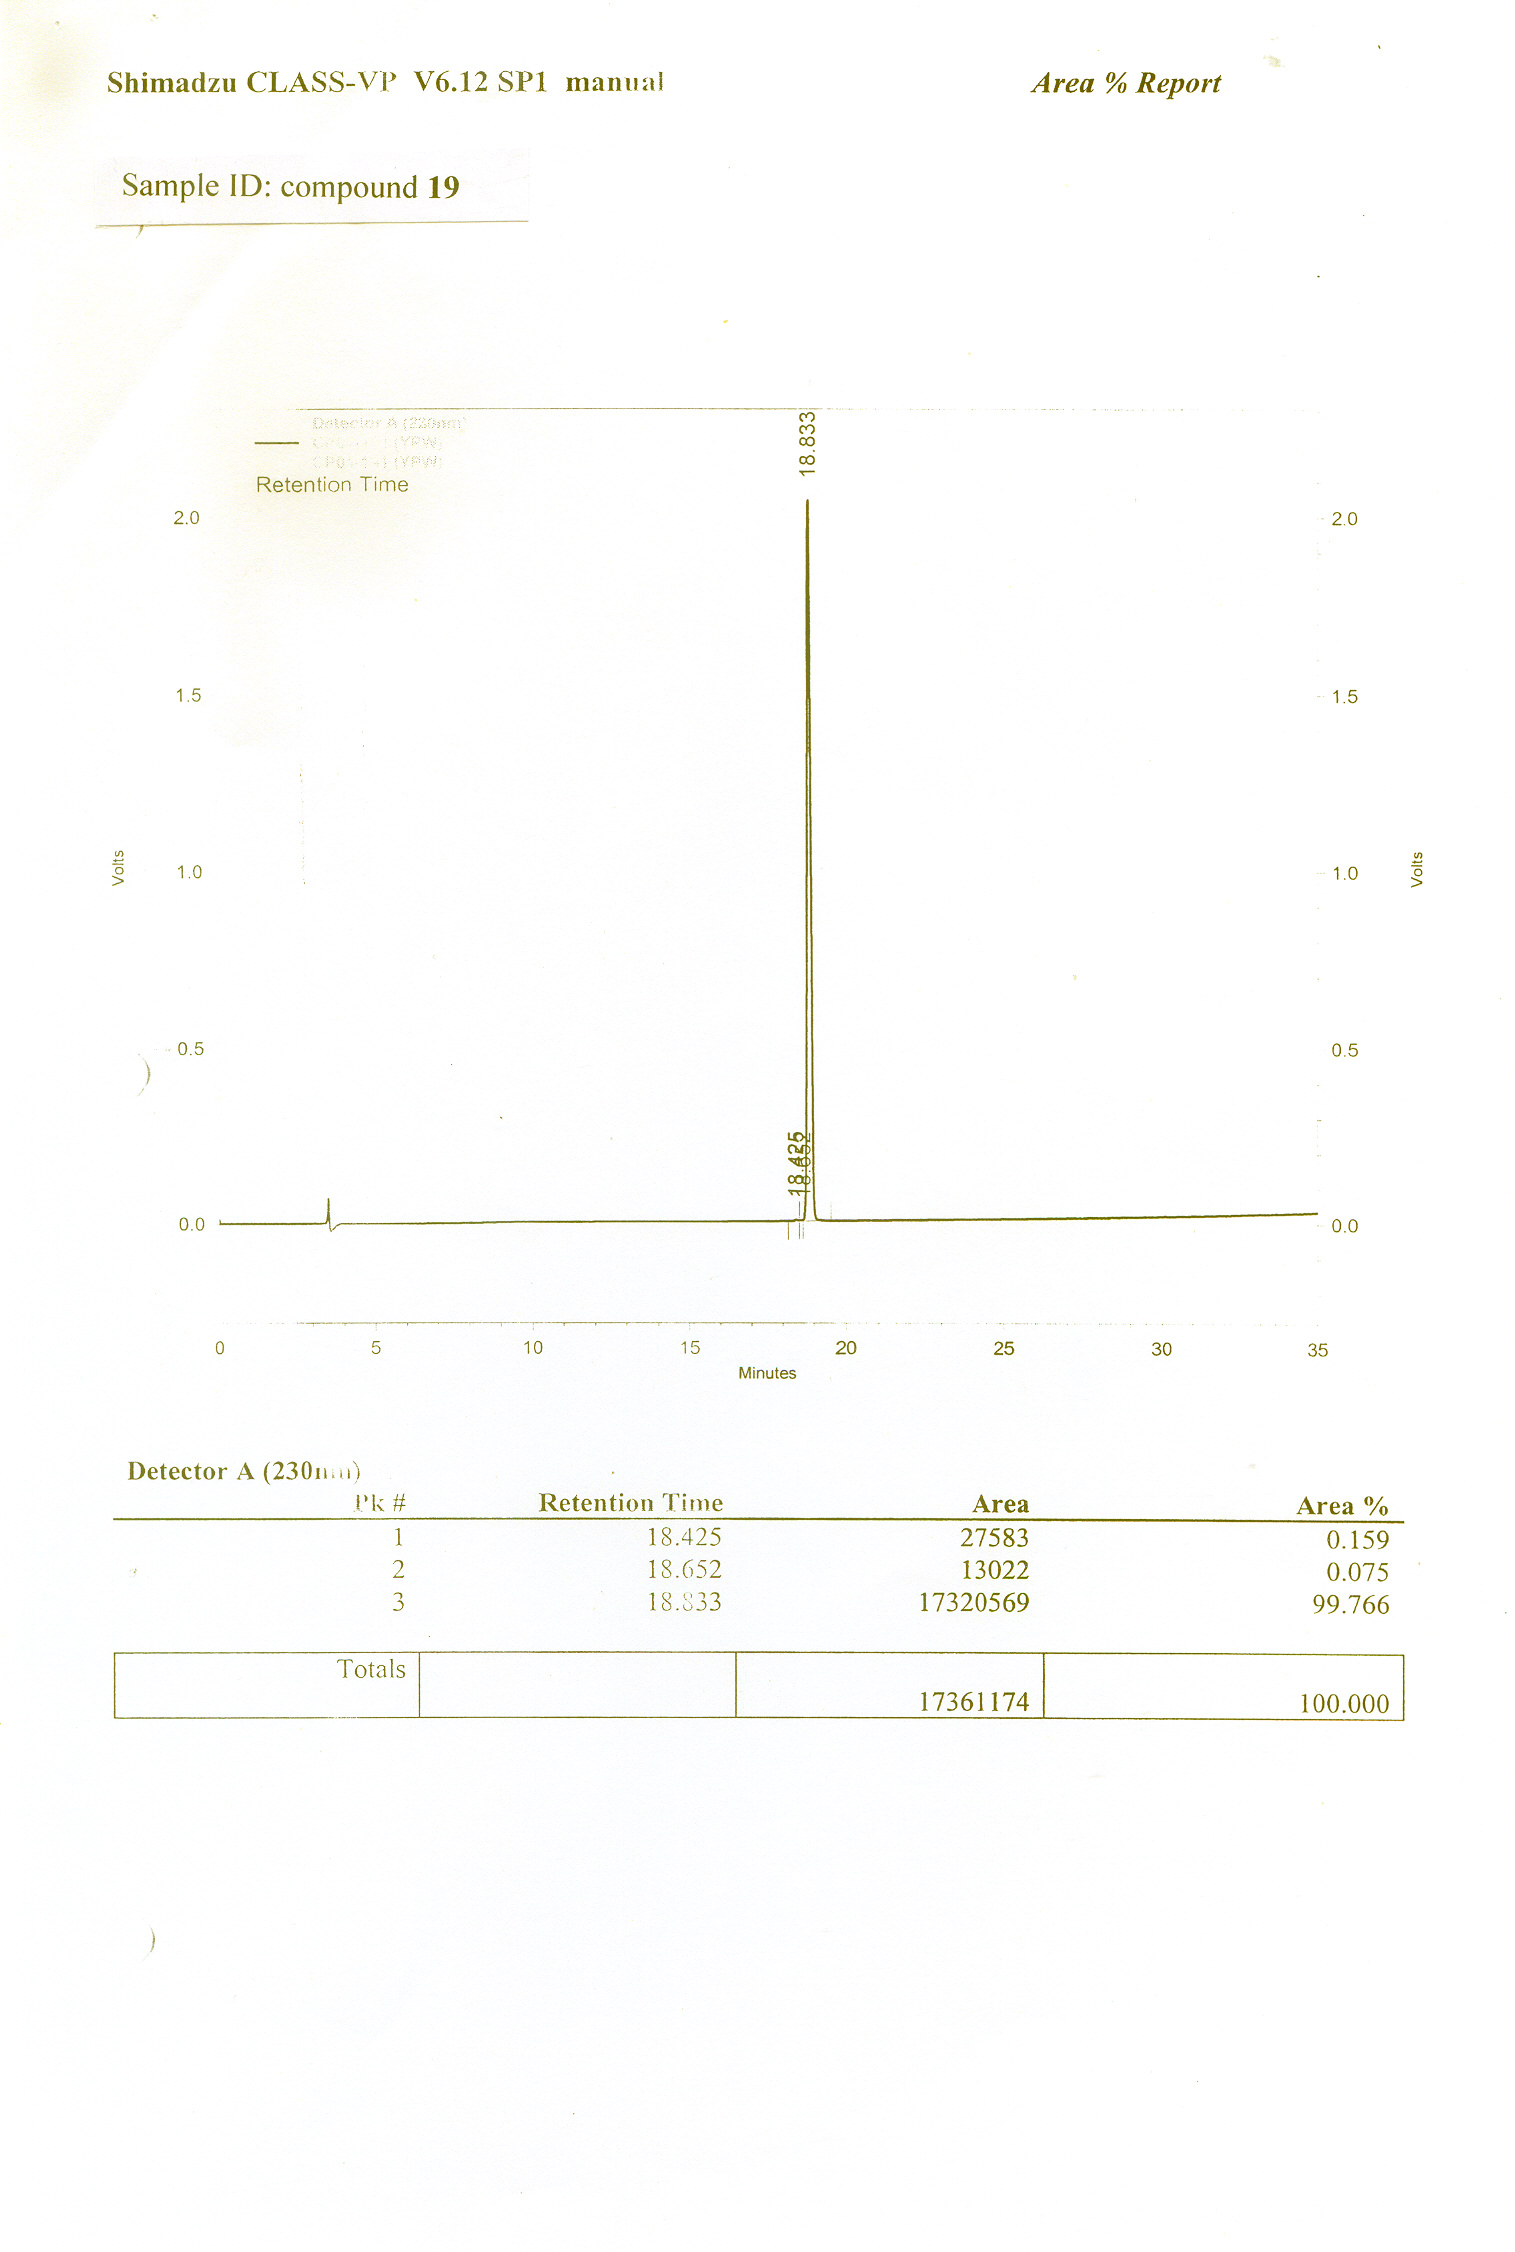


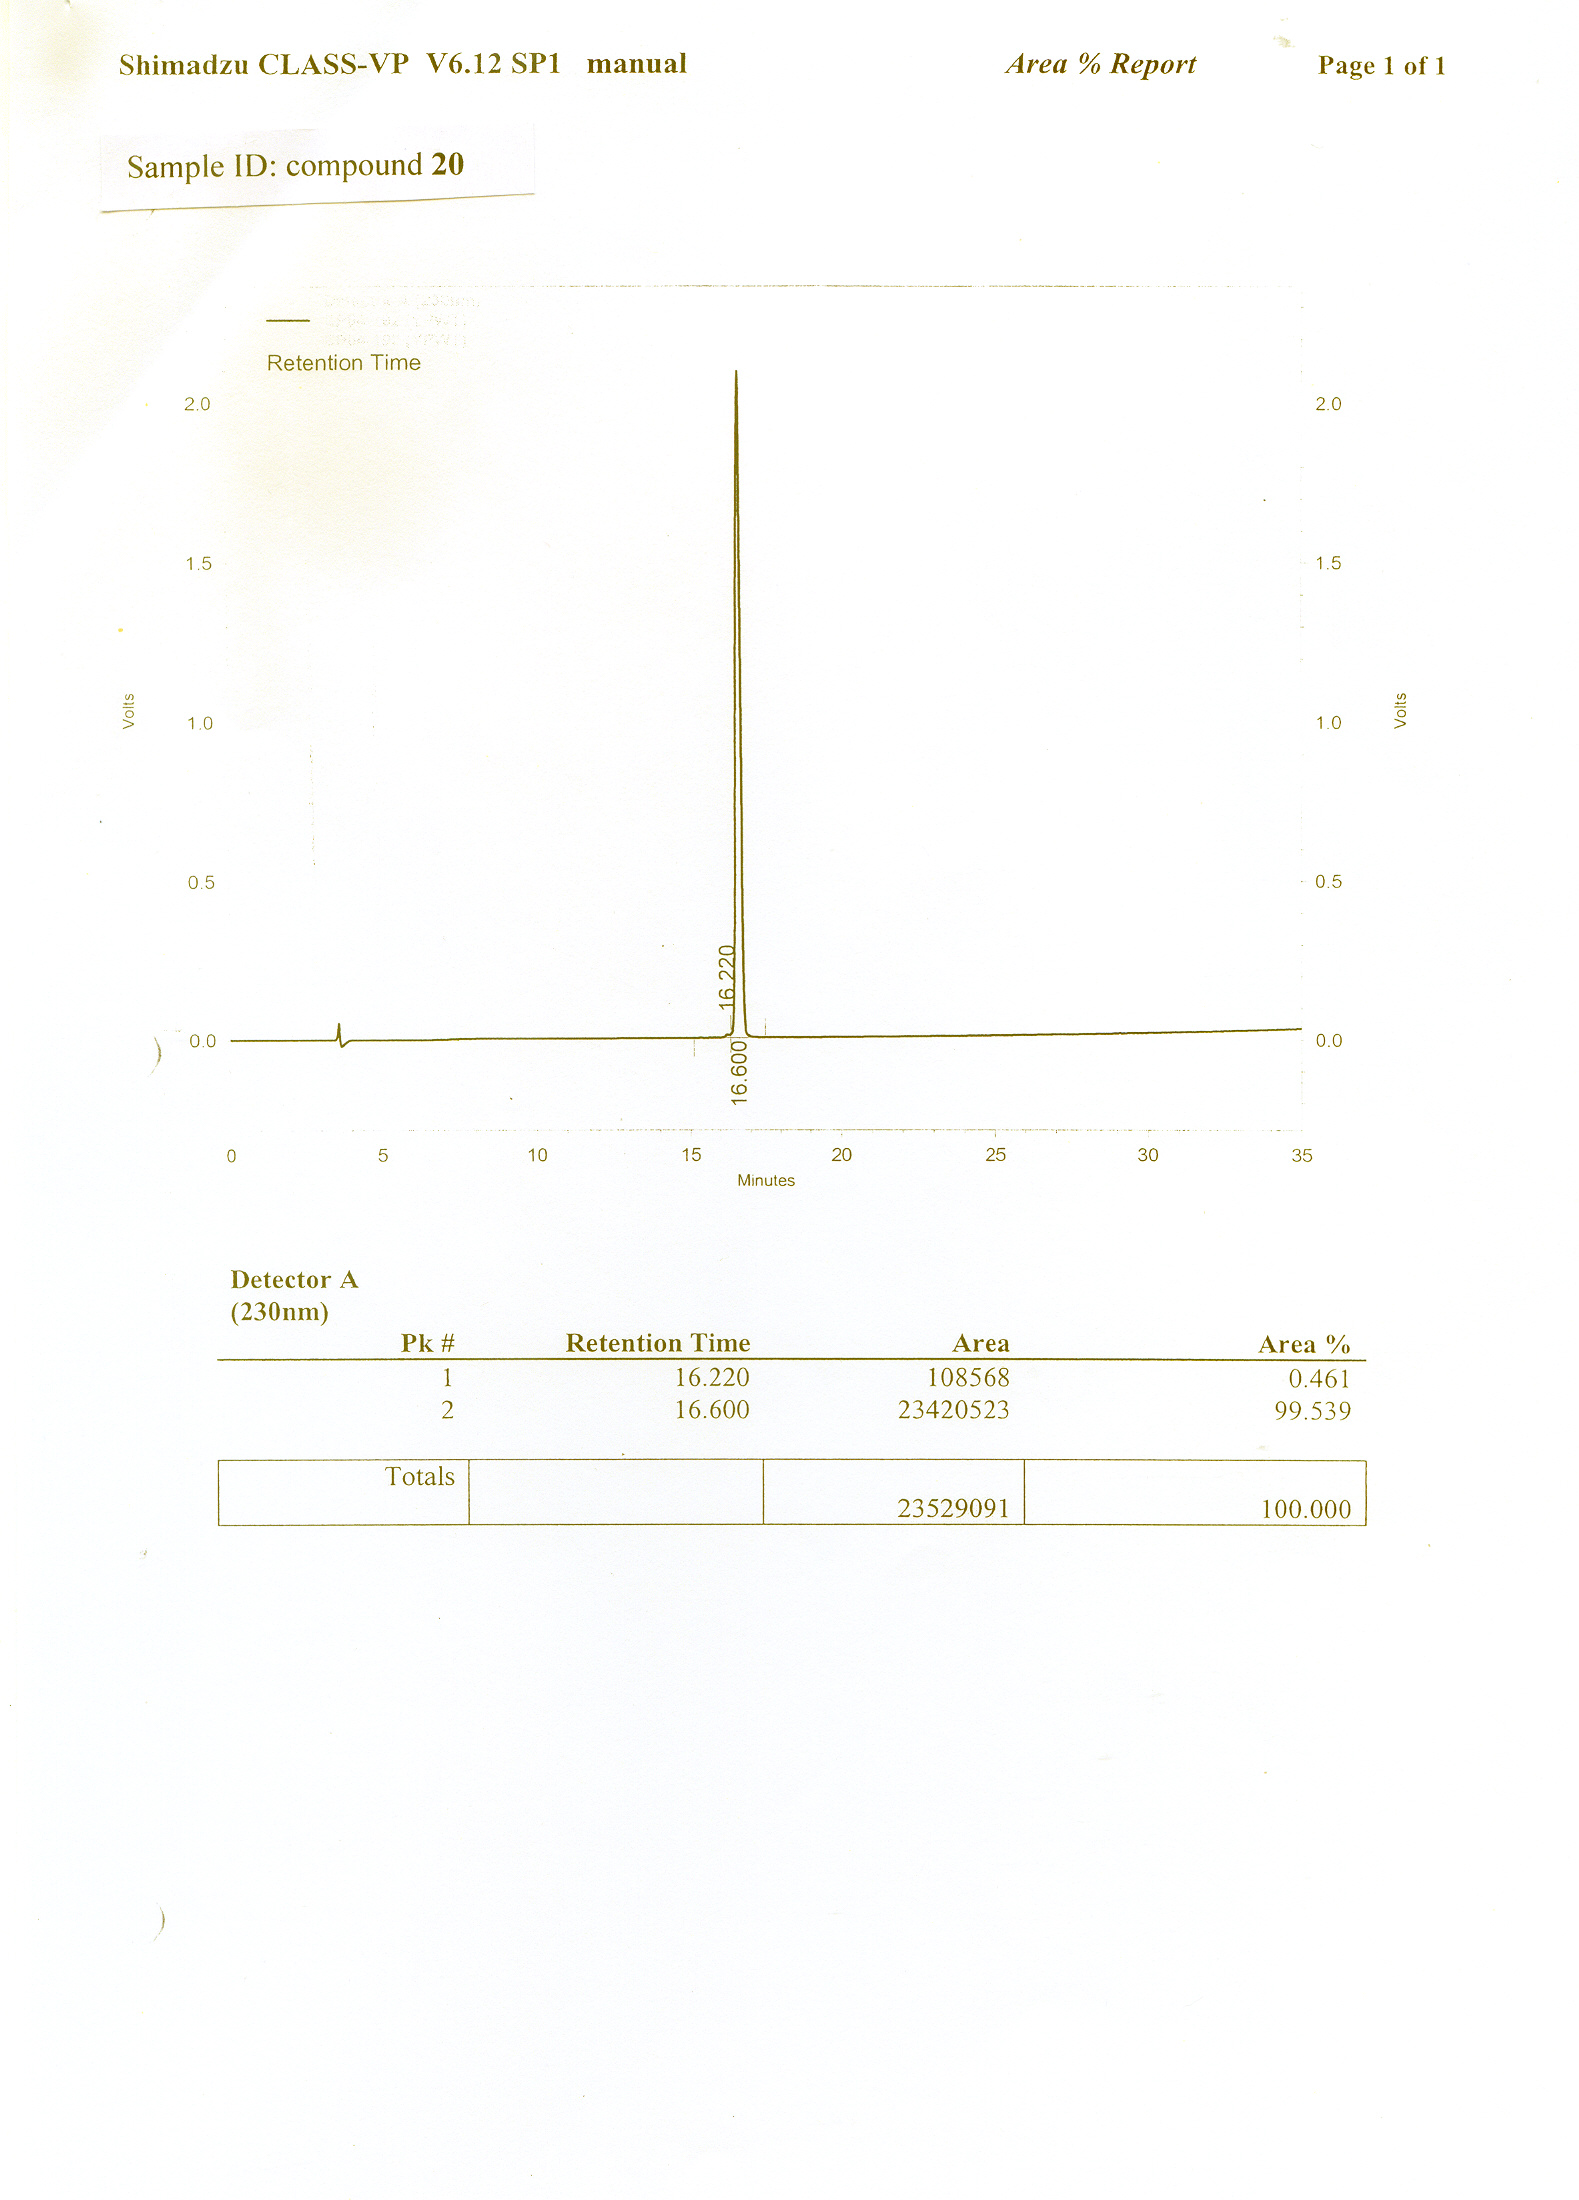


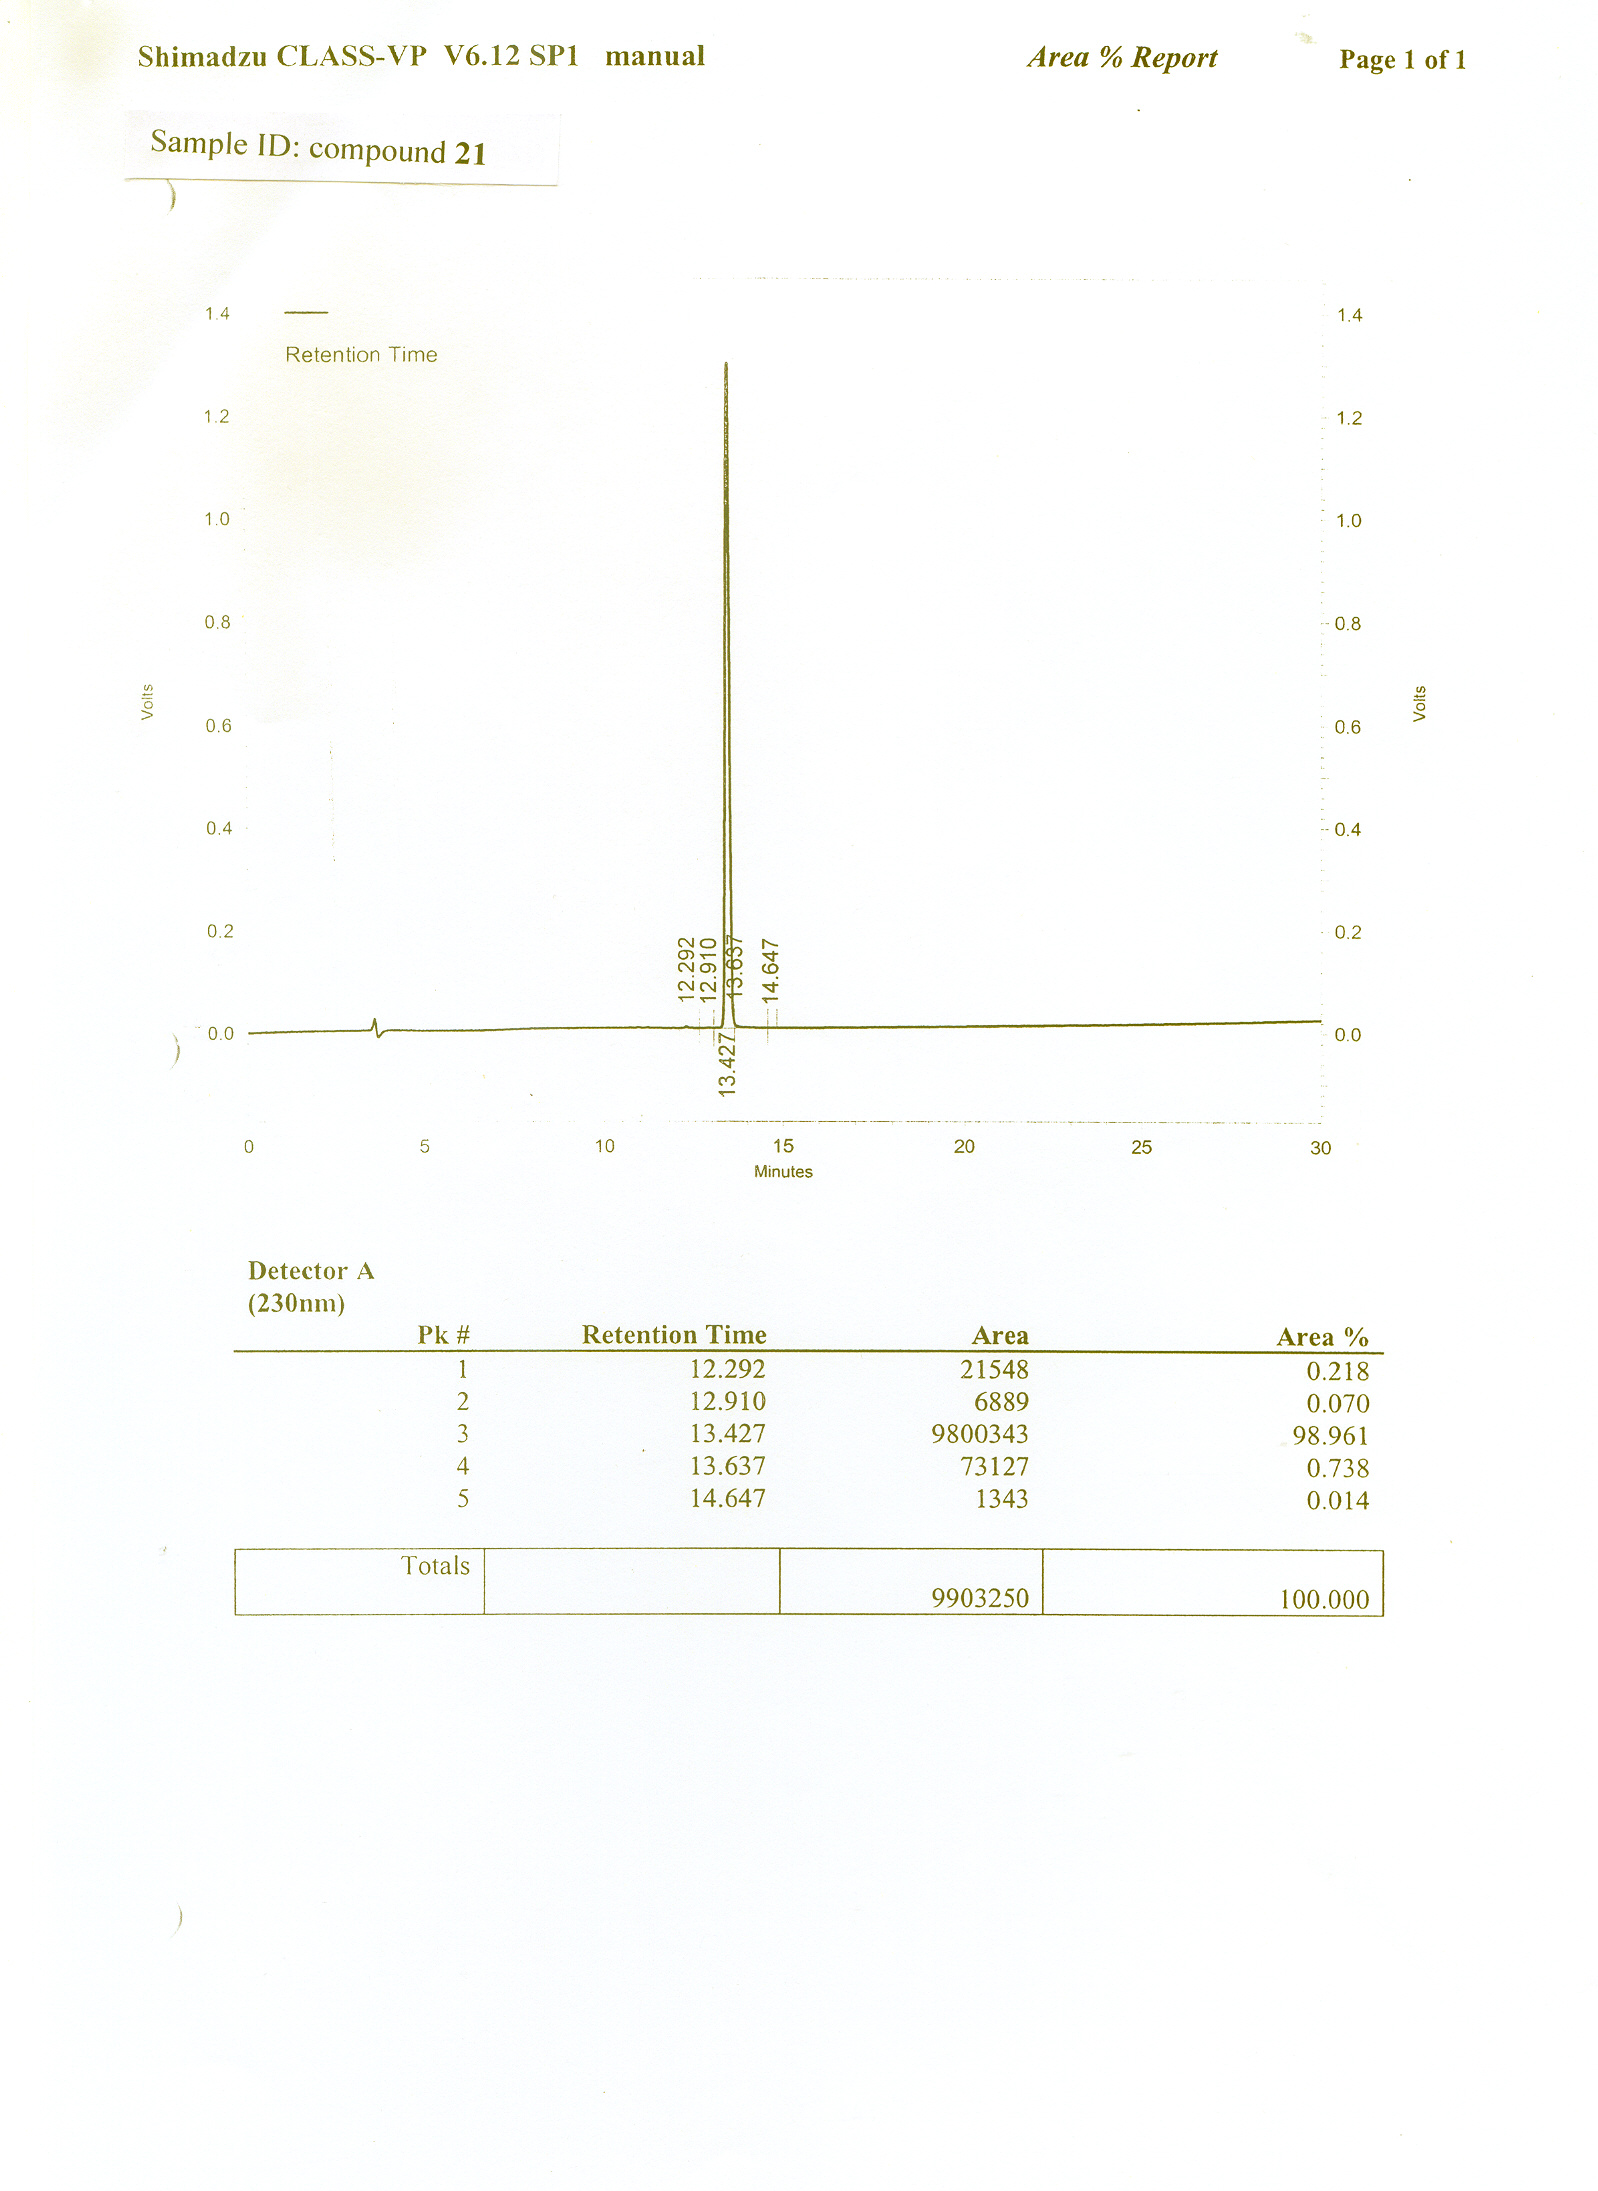


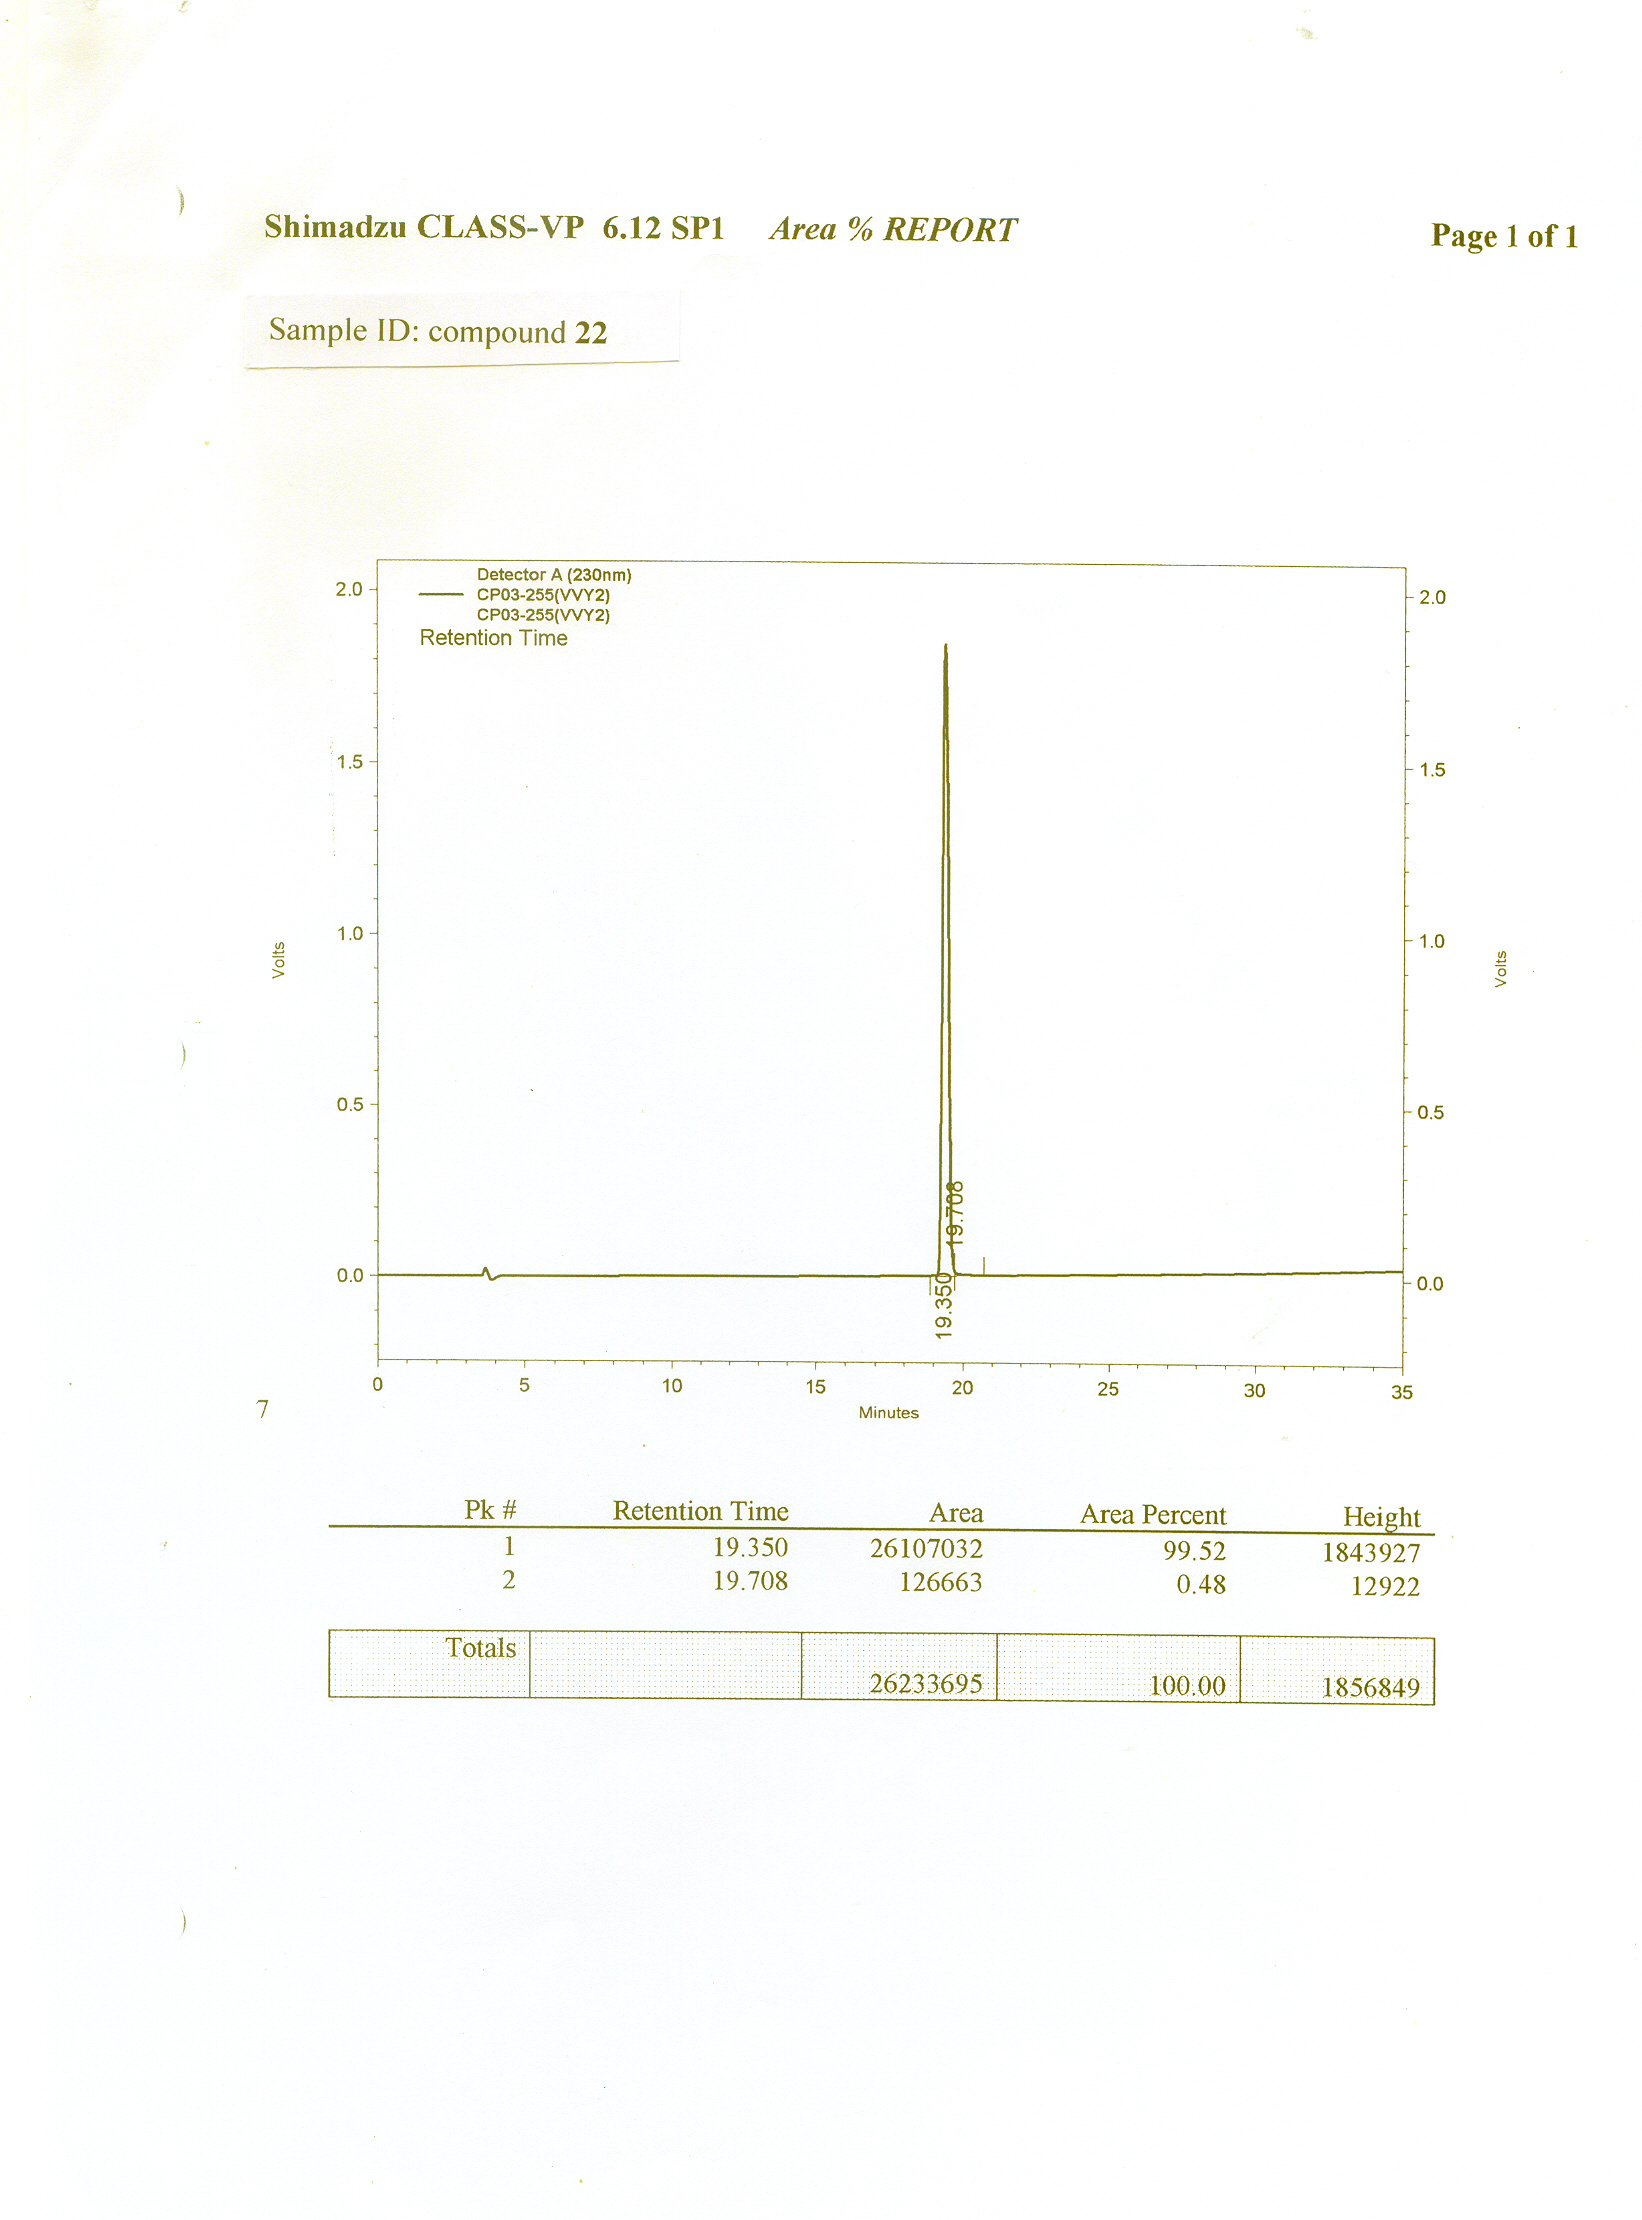

Supplement: Supplementary file 1 [file 4687375]
